# Supplementary material for: Synthesis of polycyclic spirooxindoles via an asymmetric catalytic one-pot stepwise Aldol/chloroetherification/aromatization procedure
Source: Royal Society of Chemistry journal article supplement (doi:10.1039/c8ob01713a), 2018-01-01
Supplement: c8ob01713a1.pdf [file c8ob01713a1.pdf]

# Supporting Information

## Synthesis of Polycyclic Spirooxindoles via Asymmetric Catalytic One-pot Stepwise Aldol/ Chloroetherification/Aromatization Procedure

Yan Jiang,<sup>a,b,\*</sup> Shuo-Wen Yu,<sup>b</sup> Yi Yang,<sup>a</sup> Ying-Le Liu,<sup>a</sup> Xiao-Ying Xu,<sup>b</sup> Xiao-Mei Zhang,<sup>b</sup>

Wei-Cheng Yuan<sup>b,\*</sup>

<sup>a</sup> School of Chemistry and Environmental Engineering, Sichuan University of Science & Engineering, 180  
Xueyuan Street, Huixing Lu, Zigong, Sichuan 643000, China

E-mail: jiangyan199@126.com

<sup>b</sup> Key Laboratory of Asymmetric Synthesis and Chirotechnology of Sichuan Province, Chengdu Institute of  
Organic Chemistry, Chinese Academy of Sciences, Chengdu 610041, China

|                                                                                                      |     |
|------------------------------------------------------------------------------------------------------|-----|
| General information.....                                                                             | S2  |
| General procedure for the preparation of the substrates <b>1</b> .....                               | S2  |
| Experiment data for <b>1</b> .....                                                                   | S3  |
| General procedure for the one-pot stepwise Aldol/Chloroetherification/Aromatization<br>reaction..... | S9  |
| Experiment data for <b>2</b> .....                                                                   | S9  |
| General procedure for the one-pot stepwise construction of <b>4</b> .....                            | S17 |
| Synthesis of bispirooxindole <b>5</b> .....                                                          | S18 |
| Synthesis of compound <b>6</b> .....                                                                 | S19 |
| Synthesis of compound <b>1r a</b> .....                                                              | S20 |
| X-ray crystal structure of compound <b>6</b> and <b>1r a</b> .....                                   | S20 |
| References.....                                                                                      | S22 |
| Copies of NMR and HPLC spectra.....                                                                  | S23 |

## General Information.

All starting materials were of the highest commercially available grade and used without further purification. All solvents used in the reactions were distilled from appropriate drying agents prior to use. Reactions were monitored by thin layer chromatography using silica gel HSGF254 plates. Flash chromatography (FC) was performed using silica gel HG/T2354-2010.  $^1\text{H}$  and  $^{13}\text{C}$  NMR (300 and 75 MHz or 400 and 100 MHz or 600 MHz and 151 MHz respectively) spectra were recorded in  $\text{DMSO-}d_6$  and  $\text{CDCl}_3$ .  $^1\text{H}$  NMR chemical shifts are reported in ppm ( $\delta$ ) relative to tetramethylsilane (TMS) with the solvent resonance employed as the internal standard ( $\text{CDCl}_3$ ,  $\delta = 7.26$  ppm;  $\text{DMSO-}d_6$ ,  $\delta = 2.50$  ppm). Data are reported as follows: chemical shift, multiplicity (s = singlet, br s = broad singlet, d = doublet, t = triplet, q = quartet, m = multiplet), coupling constants (Hz) and integration.  $^{13}\text{C}$  NMR chemical shifts are reported in ppm from tetramethylsilane (TMS) with the solvent resonance as the internal standard ( $\text{CDCl}_3$ ,  $\delta = 77.16$  ppm;  $\text{DMSO-}d_6$ ,  $\delta = 39.52$  ppm). ESI HRMS spectra were recorded on BioTOF Q.

### General procedure for preparation of the substrates **1**<sup>[1, 2, 3, 4]</sup>

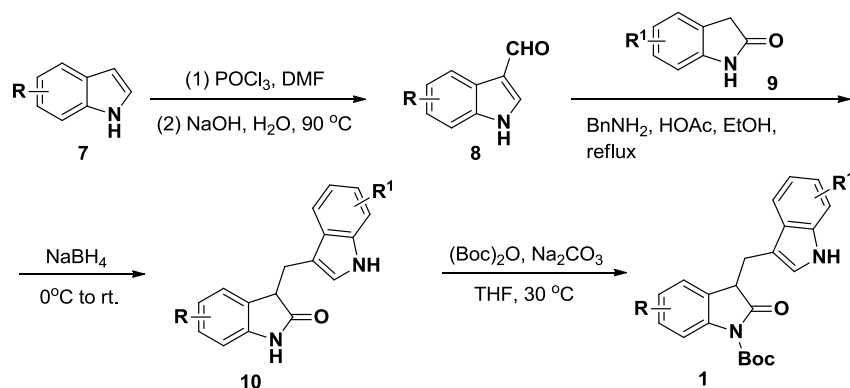

To a solution of POCl<sub>3</sub> (0.93 mL, 10 mmol) in DMF (15 mL) was added indole **7** (5 mmol) at 0 °C, the reaction was performed at room temperature until indole **7** disappeared. Then the solution was cooled to 0 °C, neutralized with aq NaOH to pH = 7, and the reaction mixture was stirred at 90 °C for 2 h later. The resulting mixture was poured into ice water (150 mL) and solid precipitated, filtered, dried to get pure indole-3-carbaldehyde **8**.

Indole-3-carbaldehyde **8** (4 mmol), BnNH<sub>2</sub> (44  $\mu\text{L}$ , 0.4 mmol), HOAc (23  $\mu\text{L}$ , 0.4 mmol) and oxindole **9** (4 mmol) were reflux in EtOH (20 mL) for 5-12 h. The resulting mixture was cooled to 0 °C, NaBH<sub>4</sub> (0.76 g, 20 mmol) was added, and the mixture was stirred at room temperature overnight. The reaction was quenched with a saturated aqueous solution of NH<sub>4</sub>Cl, and extracted with EtOAc for three times, washed with brine, dried over anhydrous Na<sub>2</sub>SO<sub>4</sub>, evaporated and the residue was purified by recrystallization or column chromatography (silica gel, hexane/EtOAc =

5/1 to 3/1) to afford **10**.

3-((1H-indol-3-yl)methyl)indolin-2-one **10** (3 mmol), (Boc)<sub>2</sub>O (2.76 mL, 12 mmol) and Na<sub>2</sub>CO<sub>3</sub> (2.54 g, 24 mmol) were stirred in THF at 30 °C for 5-12 h. The resulting mixture was filtrated, evaporated and purified by column chromatography (silica gel, hexane/EtOAc = 50/1 to 30/1) to afford **1**.

#### Experiment data for the substrates **1**

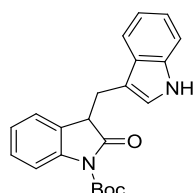

#### Tert-butyl 3-((1H-indol-3-yl)methyl)-2-oxoindoline-1-carboxylate (**1a**):

white solid, <sup>1</sup>H NMR (600 MHz, CDCl<sub>3</sub>): δ 8.03 (br s, 1H), 7.74 (d, *J* = 8.1 Hz, 1H), 7.63 (d, *J* = 7.8 Hz, 1H), 7.35 (d, *J* = 8.1 Hz, 1H), 7.17-7.23 (m, 2H), 7.09-7.12 (m, 1H), 6.98 (t, *J* = 7.5 Hz, 1H), 6.89 (d, *J* = 2.2 Hz, 1H), 6.85 (d, *J* = 7.4 Hz, 1H), 3.92 (dd, *J* = 8.8, 4.5 Hz, 1H), 3.62 (dd, *J* = 14.5, 4.5 Hz, 1H), 3.17 (dd, *J* = 14.5, 8.8 Hz, 1H), 1.61 (s, 9H). <sup>13</sup>C NMR (151 MHz, CDCl<sub>3</sub>): δ 176.08, 149.40, 140.25, 136.33, 128.16, 128.13, 127.28, 124.56, 124.00, 123.16, 122.31, 119.69, 119.05, 114.87, 111.89, 111.26, 84.32, 46.68, 28.21, 27.87. ESI HRMS exact mass calcd. for (C<sub>22</sub>H<sub>22</sub>N<sub>2</sub>O<sub>3</sub> + Na)<sup>+</sup> requires *m/z* 385.1523, found *m/z* 385.1520.

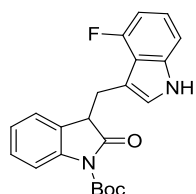

#### Tert-butyl 3-((4-fluoro-1H-indol-3-yl)methyl)-2-oxoindoline-1-carboxylate

(**1b**): white solid, <sup>1</sup>H NMR (600 MHz, CDCl<sub>3</sub>): δ 8.38 (br s, 1H), 7.77 (d, *J* = 8.1 Hz, 1H), 7.23 (t, *J* = 7.9 Hz, 1H), 7.14 (d, *J* = 8.1 Hz, 1H), 7.07 (td, *J* = 8.0, 5.0 Hz, 1H), 6.99 (td, *J* = 7.5, 0.7 Hz, 1H), 6.88 (dd, *J* = 11.7, 4.8 Hz, 2H), 6.75 (dd, *J* = 11.1, 7.8 Hz, 1H), 3.97 (dd, *J* = 8.1, 5.9 Hz, 1H), 3.67 (dd, *J* = 14.5, 5.8 Hz, 1H), 3.22 (dd, *J* = 14.5, 8.3 Hz, 1H), 1.64 (s, 9H). <sup>13</sup>C NMR (151 MHz, CDCl<sub>3</sub>): δ 176.10, 157.41 (d, *J* = 245.6 Hz), 149.53, 140.01, 139.24 (d, *J* = 11.7 Hz), 128.08, 128.05, 124.61, 124.04, 123.48, 122.70 (d, *J* = 7.7 Hz), 116.14 (d, *J* = 19.8 Hz), 114.79, 110.94, 107.58, 104.84 (d, *J* = 19.7 Hz), 84.39, 47.04, 28.90, 28.25. ESI HRMS exact mass calcd. for (C<sub>22</sub>H<sub>21</sub>FN<sub>2</sub>O<sub>3</sub> + Na)<sup>+</sup> requires *m/z* 403.1428, found *m/z* 403.1430.

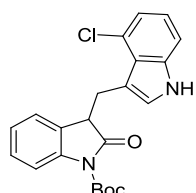

#### Tert-butyl 3-((4-chloro-1H-indol-3-yl)methyl)-2-oxoindoline-1-carboxylate

(**1c**): white solid, <sup>1</sup>H NMR (600 MHz, CDCl<sub>3</sub>): δ 8.37 (br s, 1H), 7.83 (d, *J* = 8.1 Hz, 1H), 7.21-7.37 (m, 2H), 7.05-7.15 (m, 2H), 6.92-7.03 (m, 2H), 6.80 (d, *J* = 7.5 Hz, 1H), 4.09 (dd, *J* = 8.7, 6.1 Hz, 1H), 3.85 (dd, *J* = 14.6, 6.1 Hz, 1H), 3.25 (dd, *J* = 14.6, 8.9 Hz, 1H), 1.66 (s, 9H). <sup>13</sup>C NMR (151 MHz, CDCl<sub>3</sub>): δ 175.89, 149.63, 140.02, 138.10, 128.16, 128.08, 126.52, 125.19, 124.71, 124.16, 123.93, 122.82, 120.81, 114.88, 112.60, 110.31, 84.38, 47.32, 29.26, 28.28. ESI HRMS exact mass calcd. for (C<sub>22</sub>H<sub>21</sub>ClN<sub>2</sub>O<sub>3</sub> + Na)<sup>+</sup> requires *m/z* 419.1133, found *m/z* 419.1141.

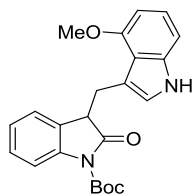

### Tert-butyl

#### 3-((4-methoxy-1H-indol-3-yl)methyl)-2-oxoindoline-1-carboxylate (1d):

white solid,  $^1\text{H}$  NMR (600 MHz,  $\text{CDCl}_3$ ):  $\delta$  8.01 (br s, 1H), 7.80 (d,  $J = 8.1$  Hz, 1H), 7.22 (t,  $J = 7.7$  Hz, 1H), 7.11 (t,  $J = 8.0$  Hz, 1H), 7.00 (d,  $J = 8.0$  Hz, 1H), 6.92 (t,  $J = 7.5$  Hz, 1H), 6.80 (d,  $J = 1.9$  Hz, 1H), 6.65 (d,  $J = 7.5$  Hz, 1H), 6.51 (d,  $J = 7.8$  Hz, 1H), 4.13 (dd,  $J = 9.6, 5.1$  Hz, 1H), 3.93 (s, 3H), 3.83 (dd,  $J = 13.9, 5.1$  Hz, 1H), 3.00 (dd,  $J = 13.9, 9.7$  Hz, 1H), 1.65 (s, 9H).  $^{13}\text{C}$  NMR (151 MHz,  $\text{CDCl}_3$ ):  $\delta$  176.29, 154.98, 149.71, 140.03, 138.41, 128.71, 127.79, 124.81, 123.68, 123.25, 122.09, 117.33, 114.70, 113.20, 104.68, 99.69, 84.18, 55.26, 47.23, 29.97, 28.29. ESI HRMS exact mass calcd. for  $(\text{C}_{23}\text{H}_{24}\text{N}_2\text{O}_4 + \text{Na})^+$  requires  $m/z$  415.1628, found  $m/z$  415.1641.

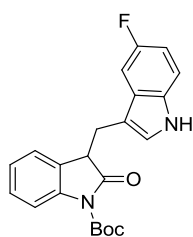

#### Tert-butyl 3-((5-fluoro-1H-indol-3-yl)methyl)-2-oxoindoline-1-carboxylate

(1e): white solid,  $^1\text{H}$  NMR (600 MHz,  $\text{CDCl}_3$ ):  $\delta$  8.01 (br s, 1H), 7.72 (d,  $J = 8.1$  Hz, 1H), 7.21-7.24 (m, 3H), 7.03 (t,  $J = 7.5$  Hz, 1H), 6.90-6.94 (m, 3H), 3.87 (dd,  $J = 7.9, 4.6$  Hz, 1H), 3.51 (dd,  $J = 14.6, 4.5$  Hz, 1H), 3.22 (dd,  $J = 14.6, 8.0$  Hz, 1H), 1.59 (s, 9H).  $^{13}\text{C}$  NMR (151 MHz,  $\text{CDCl}_3$ ):  $\delta$  175.83, 157.79

(d,  $J = 234.5$  Hz), 149.21, 140.22, 132.56, 128.12, 127.80, 127.60 (d,  $J = 9.8$  Hz), 124.86, 124.21, 123.96, 114.81, 111.71, 111.64, 110.54 (d,  $J = 26.4$  Hz), 103.91 (d,  $J = 23.4$  Hz), 84.22, 46.58, 28.04, 27.52. ESI HRMS exact mass calcd. for  $(\text{C}_{22}\text{H}_{21}\text{FN}_2\text{O}_3 + \text{Na})^+$  requires  $m/z$  403.1428, found  $m/z$  403.1421.

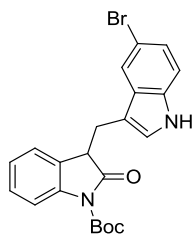

#### Tert-butyl 3-((5-bromo-1H-indol-3-yl)methyl)-2-oxoindoline-1-carboxylate

(1f): yellow solid,  $^1\text{H}$  NMR (600 MHz,  $\text{CDCl}_3$ ):  $\delta$  8.11 (br s, 1H), 7.73 (d,  $J = 8.1$  Hz, 1H), 7.68 (d,  $J = 1.5$  Hz, 1H), 7.23-7.25 (m, 2H), 7.19-7.21 (m, 1H), 7.04 (t,  $J = 7.5$  Hz, 1H), 6.92 (d,  $J = 7.5$  Hz, 1H), 6.88 (d,  $J = 2.2$  Hz, 1H), 3.88 (dd,  $J = 8.0, 4.6$  Hz, 1H), 3.51 (dd,  $J = 14.6, 4.6$  Hz, 1H), 3.21 (dd,  $J = 14.6,$

8.1 Hz, 1H), 1.60 (s, 9H).  $^{13}\text{C}$  NMR (151 MHz,  $\text{CDCl}_3$ ):  $\delta$  175.89, 149.33, 140.33, 134.85, 129.05, 128.33, 127.88, 125.14, 124.48, 124.38, 124.12, 121.68, 114.99, 112.98, 112.69, 111.41, 84.41, 46.68, 28.20, 27.59. ESI HRMS exact mass calcd. for  $(\text{C}_{22}\text{H}_{21}\text{BrN}_2\text{O}_3 + \text{Na})^+$  requires  $m/z$  463.0628, found  $m/z$  463.0632.

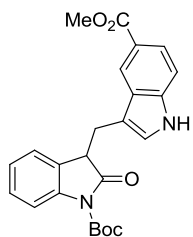

### Methyl

#### 3-((1-(tert-butoxycarbonyl)-2-oxoindolin-3-yl)methyl)-1H-indole-5-carboxylate (1g):

white solid,  $^1\text{H}$  NMR (600 MHz,  $\text{CDCl}_3$ ):  $\delta$  8.34 (br s, 2H), 7.89 (d,  $J = 8.5$  Hz, 1H), 7.72 (d,  $J = 8.1$  Hz, 1H), 7.35 (d,  $J = 8.5$  Hz, 1H), 7.22 (t,  $J = 7.9$  Hz, 1H), 7.01 (t,  $J = 7.5$  Hz, 1H), 6.96 (d,  $J = 1.5$  Hz, 1H), 6.91 (d,  $J = 7.4$  Hz, 1H), 3.95 (dd,  $J = 8.1, 4.8$  Hz, 1H), 3.92 (s, 3H), 3.61 (dd,  $J = 14.7, 4.8$  Hz, 1H), 3.27 (dd,  $J =$

14.7, 8.3 Hz, 1H), 1.60 (s, 9H).  $^{13}\text{C}$  NMR (151 MHz,  $\text{CDCl}_3$ ):  $\delta$  175.89, 168.22, 149.33, 140.24, 138.84, 128.30, 127.82, 126.95, 124.53, 124.44, 124.15, 123.74, 122.00, 121.81, 114.94, 113.21, 111.01, 84.42, 51.99, 46.65, 28.19, 27.45. ESI HRMS exact mass calcd. for  $(\text{C}_{24}\text{H}_{24}\text{N}_2\text{O}_5 + \text{Na})^+$  requires  $m/z$  443.1577, found  $m/z$  443.1585.

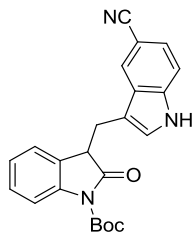

**Tert-butyl 3-((5-cyano-1H-indol-3-yl)methyl)-2-oxoindoline-1-carboxylate**

**(1h):** white solid,  $^1\text{H}$  NMR (600 MHz,  $\text{CDCl}_3$ ):  $\delta$  8.45 (br s, 1H), 7.84 (s, 1H), 7.68 (d,  $J = 8.1$  Hz, 1H), 7.37 (s, 2H), 7.24-7.27 (m, 1H), 7.09-7.11 (m, 2H), 6.98 (d,  $J = 2.1$  Hz, 1H), 3.88-3.90 (m, 1H), 3.49 (dd,  $J = 14.7, 4.8$  Hz, 1H), 3.40 (dd,  $J = 14.7, 7.0$  Hz, 1H), 1.57 (s, 9H).  $^{13}\text{C}$  NMR (151 MHz,  $\text{CDCl}_3$ ):  $\delta$

175.78, 149.21, 140.42, 137.71, 128.56, 127.57, 127.25, 125.49, 125.11, 124.87, 124.33, 124.14, 120.77, 115.11, 112.39, 112.12, 102.82, 84.54, 46.87, 28.17, 27.12. ESI HRMS exact mass calcd. for  $(\text{C}_{23}\text{H}_{21}\text{N}_3\text{O}_3 + \text{Na})^+$  requires  $m/z$  410.1475, found  $m/z$  410.1476.

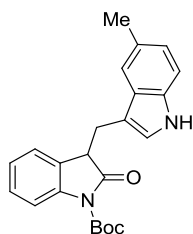

**Tert-butyl 3-((5-methyl-1H-indol-3-yl)methyl)-2-oxoindoline-1-carboxylate**

**(1i):** white solid,  $^1\text{H}$  NMR (600 MHz,  $\text{CDCl}_3$ ):  $\delta$  7.96 (br s, 1H), 7.76 (d,  $J = 8.1$  Hz, 1H), 7.42 (s, 1H), 7.20-7.28 (m, 2H), 7.02 (dd,  $J = 8.2, 0.9$  Hz, 1H), 6.98 (t,  $J = 7.5$  Hz, 1H), 6.86 (d,  $J = 2.1$  Hz, 1H), 6.81 (d,  $J = 7.5$  Hz, 1H), 3.92 (dd,  $J = 9.2, 4.3$  Hz, 1H), 3.58-3.65 (m, 1H), 3.09 (dd,  $J = 14.5, 9.3$  Hz, 1H),

2.44 (s, 3H), 1.62 (s, 9H).  $^{13}\text{C}$  NMR (151 MHz,  $\text{CDCl}_3$ ):  $\delta$  176.12, 149.43, 140.21, 134.74, 128.92, 128.29, 128.09, 127.43, 124.66, 123.94, 123.33, 118.67, 114.85, 111.42, 110.96, 84.30, 46.55, 28.22, 28.08, 21.62. ESI HRMS exact mass calcd. for  $(\text{C}_{23}\text{H}_{24}\text{N}_2\text{O}_3 + \text{Na})^+$  requires  $m/z$  399.1679, found  $m/z$  399.1686.

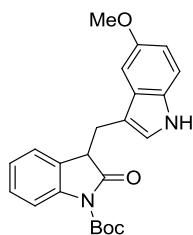

**Tert-butyl**

**3-((5-methoxy-1H-indol-3-yl)methyl)-2-oxoindoline-1-carboxylate (1j):**

white solid,  $^1\text{H}$  NMR (600 MHz,  $\text{CDCl}_3$ ):  $\delta$  7.93 (br s, 1H), 7.74 (d,  $J = 8.2$  Hz, 1H), 7.23 (t,  $J = 7.4$  Hz, 2H), 6.96-7.06 (m, 2H), 6.85 (dt,  $J = 8.8, 4.9$  Hz, 3H), 3.90 (dd,  $J = 8.8, 4.4$  Hz, 1H), 3.84 (s, 3H), 3.58 (dd,  $J = 14.6, 4.4$  Hz, 1H),

3.16 (dd,  $J = 14.6, 8.8$  Hz, 1H), 1.61 (s, 9H).  $^{13}\text{C}$  NMR (151 MHz,  $\text{CDCl}_3$ ):  $\delta$  176.13, 154.22, 149.37, 140.32, 131.41, 128.15, 127.65, 124.60, 124.01, 124.00, 114.91, 112.75, 111.99, 111.55, 111.54, 100.63, 84.32, 56.02, 46.65, 28.20, 27.95. ESI HRMS exact mass calcd. for  $(\text{C}_{23}\text{H}_{24}\text{N}_2\text{O}_4 + \text{Na})^+$  requires  $m/z$  415.1628, found  $m/z$  415.1625.

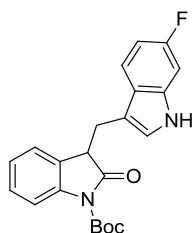

**Tert-butyl 3-((6-fluoro-1H-indol-3-yl)methyl)-2-oxoindoline-1-carboxylate**

**(1k):** white solid,  $^1\text{H}$  NMR (600 MHz,  $\text{CDCl}_3$ ):  $\delta$  8.02 (br s, 1H), 7.72 (d,  $J = 8.2$  Hz, 1H), 7.50 (dd,  $J = 8.7, 5.3$  Hz, 1H), 7.23 (t,  $J = 7.8$  Hz, 1H), 6.98-7.06 (m, 2H), 6.90 (d,  $J = 7.4$  Hz, 1H), 6.81-6.88 (m, 2H), 3.88 (dd,  $J = 8.2, 4.5$  Hz,

1H), 3.56 (dd,  $J = 14.6, 4.5$  Hz, 1H), 3.21 (dd,  $J = 14.6, 8.3$  Hz, 1H), 1.60 (s, 9H).  $^{13}\text{C}$  NMR (151 MHz,  $\text{CDCl}_3$ ):  $\delta$  176.00, 160.17 (d,  $J = 237.5$  Hz), 149.32, 140.33, 136.16 (d,  $J = 12.4$  Hz), 128.24, 127.98, 124.41, 124.07, 123.92, 123.38 (d,  $J = 3.3$  Hz), 119.85 (d,  $J = 10.4$  Hz), 114.94, 111.88, 108.45 (d,  $J = 24.5$  Hz), 97.52 (d,  $J = 26.2$  Hz), 84.37, 46.76, 28.20, 27.68. ESI HRMS exact mass calcd. for  $(\text{C}_{22}\text{H}_{21}\text{FN}_2\text{O}_3 + \text{Na})^+$  requires  $m/z$  403.1428, found  $m/z$  403.1423.

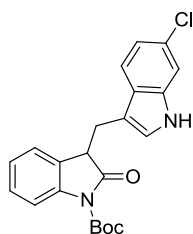

**Tert-butyl 3-((6-chloro-1H-indol-3-yl)methyl)-2-oxoindoline-1-carboxylate**

**(1l):** white solid,  $^1\text{H}$  NMR (600 MHz,  $\text{CDCl}_3$ ):  $\delta$  8.05 (br s, 1H), 7.71 (d,  $J = 8.2$  Hz, 1H), 7.48 (d,  $J = 8.5$  Hz, 1H), 7.32 (d,  $J = 1.7$  Hz, 1H), 7.23 (t,  $J = 7.8$  Hz, 1H), 6.98-7.08 (m, 2H), 6.91 (d,  $J = 7.5$  Hz, 1H), 6.85 (d,  $J = 2.3$  Hz, 1H), 3.87 (dd,  $J = 8.1, 4.6$  Hz, 1H), 3.54 (ddd,  $J = 14.6, 4.6, 0.7$  Hz, 1H), 3.23 (dd,  $J = 14.6, 8.2$  Hz, 1H), 1.60 (s, 9H).  $^{13}\text{C}$  NMR (151 MHz,  $\text{CDCl}_3$ ):  $\delta$  175.98, 149.28, 140.33, 136.56, 128.27, 128.21, 127.90, 125.94, 124.37, 124.10, 123.83, 120.42, 119.99, 114.96, 111.89, 111.17, 84.41, 46.78, 28.19, 27.57. ESI HRMS exact mass calcd. for  $(\text{C}_{22}\text{H}_{21}\text{ClN}_2\text{O}_3 + \text{Na})^+$  requires  $m/z$  419.1133, found  $m/z$  419.1124.

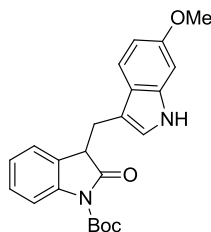

**Tert-butyl**

**3-((6-methoxy-1H-indol-3-yl)methyl)-2-oxoindoline-1-carboxylate (1m):**

white solid,  $^1\text{H}$  NMR (600 MHz,  $\text{CDCl}_3$ ):  $\delta$  7.89 (br s, 1H), 7.74 (d,  $J = 8.2$  Hz, 1H), 7.48 (d,  $J = 8.7$  Hz, 1H), 7.22 (t,  $J = 7.9$  Hz, 1H), 6.99 (t,  $J = 7.5$  Hz, 1H), 6.83-6.85 (m, 2H), 6.76-6.77 (m, 2H), 3.89 (dd,  $J = 8.8, 4.4$  Hz, 1H), 3.83 (s, 3H), 3.58 (dd,  $J = 14.5, 4.4$  Hz, 1H), 3.13 (dd,  $J = 14.6, 8.8$  Hz, 1H), 1.61 (s, 9H).  $^{13}\text{C}$  NMR (151 MHz,  $\text{CDCl}_3$ ):  $\delta$  176.08, 156.74, 149.40, 140.25, 137.11, 128.17, 128.11, 124.57, 123.99, 121.90, 121.71, 119.70, 114.85, 111.88, 109.62, 94.78, 84.30, 55.78, 46.72, 28.22, 27.94. ESI HRMS exact mass calcd. for  $(\text{C}_{23}\text{H}_{24}\text{N}_2\text{O}_4 + \text{Na})^+$  requires  $m/z$  415.1628, found  $m/z$  415.1621.

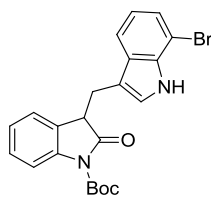

**Tert-butyl**

**3-((7-bromo-1H-indol-3-yl)methyl)-2-oxoindoline-1-carboxylate (1n):**

yellow solid,  $^1\text{H}$  NMR (600 MHz,  $\text{CDCl}_3$ ):  $\delta$  8.17 (br s, 1H), 7.73 (d,  $J = 8.2$  Hz, 1H), 7.55 (d,  $J = 7.9$  Hz, 1H), 7.33 (d,  $J = 7.6$  Hz, 1H), 7.24 (t,  $J = 7.9$  Hz, 1H), 7.02 (t,  $J = 7.5$  Hz, 1H), 6.98 (t,  $J = 7.8$  Hz, 1H), 6.93 (d,  $J = 2.0$  Hz, 1H), 6.90 (d,  $J = 7.5$  Hz, 1H), 3.89 (dd,  $J = 8.3, 4.5$  Hz, 1H), 3.57 (dd,  $J = 14.6, 4.5$  Hz, 1H), 3.22 (dd,  $J = 14.7, 8.3$  Hz, 1H), 1.60 (s, 9H).  $^{13}\text{C}$  NMR (151 MHz,  $\text{CDCl}_3$ ):  $\delta$  175.89, 149.28, 140.33, 134.93, 128.52, 128.29, 127.86, 124.65, 124.40, 124.10, 123.73, 120.89, 118.39, 114.98, 113.09, 104.84, 84.38, 46.70, 28.20, 27.79. ESI HRMS exact mass calcd. for  $(\text{C}_{22}\text{H}_{21}\text{BrN}_2\text{O}_3 + \text{Na})^+$  requires  $m/z$  463.0628, found  $m/z$  463.0614.

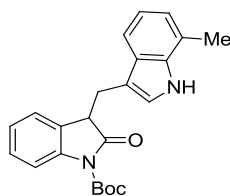

**Tert-butyl**

**3-((7-methyl-1H-indol-3-yl)methyl)-2-oxoindoline-1-carboxylate (1o):**

white solid,  $^1\text{H}$  NMR (600 MHz,  $\text{CDCl}_3$ ):  $\delta$  7.94 (br s, 1H), 7.75 (d,  $J = 8.2$  Hz, 1H), 7.49 (d,  $J = 7.8$  Hz, 1H), 7.23 (t,  $J = 7.8$  Hz, 1H), 7.04 (t,  $J = 7.4$  Hz, 1H), 6.96-7.02 (m, 2H), 6.92 (d,  $J = 2.2$  Hz, 1H), 6.84 (d,  $J = 7.5$  Hz, 1H), 3.92 (dd,  $J = 9.0$ , 4.4 Hz, 1H), 3.60-3.69 (m, 1H), 3.14 (dd,  $J = 14.6$ , 9.0 Hz, 1H), 2.49 (s, 3H), 1.62 (s, 9H).  $^{13}\text{C}$  NMR (151 MHz,  $\text{CDCl}_3$ ):  $\delta$  176.07, 149.43, 140.24, 135.96, 128.22, 128.12, 126.83, 124.61, 123.99, 122.88, 122.85, 120.40, 119.93, 116.79, 114.87, 112.51, 84.31, 46.65, 28.22, 28.02, 16.73. ESI HRMS exact mass calcd. for  $(\text{C}_{23}\text{H}_{24}\text{N}_2\text{O}_3 + \text{Na})^+$  requires  $m/z$  399.1679, found  $m/z$  399.1683.

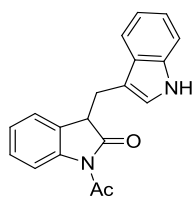

**3-((1H-indol-3-yl)methyl)-1-acetylindolin-2-one (1p):** white solid,  $^1\text{H}$  NMR

(600 MHz,  $\text{CDCl}_3$ ):  $\delta$  8.13 (d,  $J = 8.2$  Hz, 1H), 7.98 (s, 1H), 7.64 (d,  $J = 7.9$  Hz, 1H), 7.33 (d,  $J = 8.1$  Hz, 1H), 7.23-7.29 (m, 1H), 7.19 (t,  $J = 7.6$  Hz, 1H), 7.06-7.15 (m, 2H), 7.00 (d,  $J = 7.5$  Hz, 1H), 6.75 (d,  $J = 1.8$  Hz, 1H), 3.98 (dd,  $J = 7.8$ , 4.6 Hz, 1H), 3.56 (dd,  $J = 14.6$ , 4.5 Hz, 1H), 3.34 (dd,  $J = 14.6$ , 7.9 Hz, 1H), 2.55 (s, 3H).  $^{13}\text{C}$  NMR (151 MHz,  $\text{CDCl}_3$ ):  $\delta$  178.34, 171.07, 140.78, 136.16, 128.35, 127.19, 124.84, 124.20, 123.03, 122.38, 119.71, 118.97, 116.45, 111.29, 111.19, 46.88, 27.76, 26.69. ESI HRMS exact mass calcd. for  $(\text{C}_{19}\text{H}_{16}\text{N}_2\text{O}_2 + \text{Na})^+$  requires  $m/z$  327.1104, found  $m/z$  327.1100.

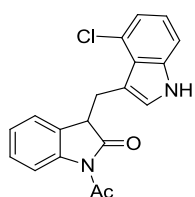

**1-acetyl-3-((4-chloro-1H-indol-3-yl)methyl)indolin-2-one (1q):** white solid,

$^1\text{H}$  NMR (600 MHz,  $\text{CDCl}_3$ ):  $\delta$  8.22-8.24 (m, 2H), 7.27-7.33 (m, 2H), 7.08-7.15 (m, 2H), 7.05 (td,  $J = 7.5$ , 0.9 Hz, 1H), 6.92 (d,  $J = 2.3$  Hz, 1H), 6.83 (d,  $J = 7.5$  Hz, 1H), 4.15 (dd,  $J = 8.8$ , 6.1 Hz, 1H), 3.84 (ddd,  $J = 14.5$ , 6.0, 0.6 Hz, 1H), 3.29 (dd,  $J = 14.5$ , 8.8 Hz, 1H), 2.69 (s, 3H).  $^{13}\text{C}$  NMR (151 MHz,  $\text{CDCl}_3$ ):  $\delta$  178.06, 171.28, 140.40, 138.05, 128.36, 128.29, 126.50, 124.91, 124.72, 124.44, 124.10, 123.03, 121.00, 116.50, 112.48, 110.33, 47.41, 29.33, 26.91. ESI HRMS exact mass calcd. for  $(\text{C}_{19}\text{H}_{15}\text{ClN}_2\text{O}_2 + \text{Na})^+$  requires  $m/z$  361.0714, found  $m/z$  361.0709.

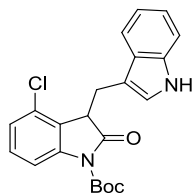

**Tert-butyl 3-((1H-indol-3-yl)methyl)-4-chloro-2-oxoindoline-1-carboxylate**

**(1r):** white solid,  $^1\text{H}$  NMR (600 MHz,  $\text{CDCl}_3$ ):  $\delta$  7.85 (s, 1H), 7.56 (d,  $J = 7.9$

Hz, 1H), 7.47 (dd,  $J = 6.0$ , 3.0 Hz, 1H), 7.21 (d,  $J = 8.1$  Hz, 1H), 7.10-7.15 (m, 2H), 7.05-7.10 (m, 1H), 6.98-7.03 (m, 1H), 6.76 (d,  $J = 2.3$  Hz, 1H), 3.94 (dd,  $J = 5.4$ , 3.9 Hz, 1H), 3.78 (dd,  $J = 14.7$ , 5.5 Hz, 1H), 3.70 (dd,  $J = 14.6$ , 3.8 Hz, 1H), 1.48 (s, 9H).  $^{13}\text{C}$  NMR (151 MHz,  $\text{CDCl}_3$ ):  $\delta$  175.31, 148.82, 142.11, 135.77, 130.44, 129.39, 127.51, 125.69, 124.62, 123.29, 121.88, 119.53, 119.23, 113.32, 110.79, 110.11, 84.35, 47.78, 28.04, 25.20. ESI HRMS exact mass calcd. for  $(\text{C}_{22}\text{H}_{21}\text{ClN}_2\text{O}_3 + \text{Na})^+$  requires  $m/z$  419.1133, found  $m/z$  419.1128.

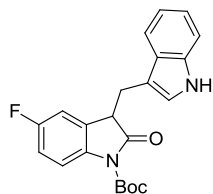

**Tert-butyl**

**3-((1H-indol-3-yl)methyl)-5-fluoro-2-oxoindoline-1-carboxylate (1s):**

white solid,  $^1\text{H}$  NMR (600 MHz,  $\text{CDCl}_3$ ):  $\delta$  8.07 (s, 1H), 7.73 (dd,  $J = 8.9$ , 4.6 Hz, 1H), 7.64 (d,  $J = 7.9$  Hz, 1H), 7.38 (d,  $J = 8.1$  Hz, 1H), 7.18-7.24 (m, 1H), 7.15-7.10 (m, 1H), 6.88-6.96 (m, 2H), 6.53 (dd,  $J = 8.0$ , 2.6 Hz, 1H), 3.90 (dd,  $J = 9.1$ , 4.4 Hz, 1H), 3.64 (ddd,  $J = 14.5$ , 4.4, 0.8 Hz, 1H), 3.14 (dd,  $J = 14.6$ , 9.1 Hz, 1H), 1.61 (s, 9H).  $^{13}\text{C}$  NMR (151 MHz,  $\text{CDCl}_3$ ):  $\delta$  175.54, 159.58 (d,  $J = 242.5$  Hz), 149.33, 136.41, 136.21, 129.93 (d,  $J = 8.6$  Hz), 127.05, 123.20, 122.50, 119.85, 118.93, 116.05 (d,  $J = 8.0$  Hz), 114.54 (d,  $J = 23.0$  Hz), 112.09 (d,  $J = 24.9$  Hz), 111.46, 111.40, 84.52, 46.72, 28.20, 27.89. ESI HRMS exact mass calcd. for  $(\text{C}_{22}\text{H}_{21}\text{FN}_2\text{O}_3 + \text{Na})^+$  requires  $m/z$  403.1428, found  $m/z$  403.1429.

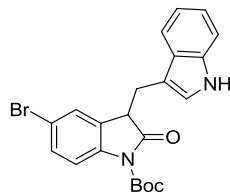

**Tert-butyl**

**3-((1H-indol-3-yl)methyl)-5-bromo-2-oxoindoline-1-carboxylate (1t):**

white solid,  $^1\text{H}$  NMR (600 MHz,  $\text{CDCl}_3$ ):  $\delta$  8.06 (s, 1H), 7.64 (t,  $J = 9.0$  Hz, 2H), 7.33-7.40 (m, 2H), 7.21 (dd,  $J = 11.2$ , 3.9 Hz, 1H), 7.13 (dd,  $J = 11.0$ , 3.9 Hz, 1H), 6.96 (d,  $J = 0.7$  Hz, 1H), 6.91 (d,  $J = 1.9$  Hz, 1H), 3.88 (dd,  $J = 8.7$ , 4.4 Hz, 1H), 3.61 (dd,  $J = 14.5$ , 4.4 Hz, 1H), 3.16 (dd,  $J = 14.6$ , 8.8 Hz, 1H), 1.60 (s, 9H).  $^{13}\text{C}$  NMR (151 MHz,  $\text{CDCl}_3$ ):  $\delta$  175.09, 149.18, 139.33, 136.37, 131.05, 130.26, 127.63, 127.04, 123.20, 122.49, 119.85, 118.94, 117.01, 116.51, 111.37, 84.69, 46.52, 28.18, 27.90. ESI HRMS exact mass calcd. for  $(\text{C}_{22}\text{H}_{21}\text{BrN}_2\text{O}_3 + \text{Na})^+$  requires  $m/z$  463.0628, found  $m/z$  463.0620.

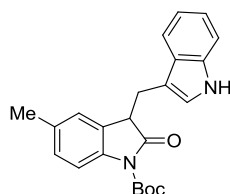

**Tert-butyl**

**3-((1H-indol-3-yl)methyl)-5-methyl-2-oxoindoline-1-carboxylate (1u):**

white solid,  $^1\text{H}$  NMR (600 MHz,  $\text{CDCl}_3$ ):  $\delta$  8.02 (s, 1H), 7.61 (t,  $J = 8.0$  Hz, 2H), 7.36 (d,  $J = 8.1$  Hz, 1H), 7.19 (t,  $J = 7.6$  Hz, 1H), 7.10 (t,  $J = 7.5$  Hz, 1H), 7.03 (d,  $J = 7.9$  Hz, 1H), 6.90 (d,  $J = 2.1$  Hz, 1H), 6.71 (s, 1H), 3.87 (dd,  $J = 8.4$ , 4.5 Hz, 1H), 3.59 (dd,  $J = 14.6$ , 4.5 Hz, 1H), 3.19 (dd,  $J = 14.6$ , 8.5 Hz, 1H), 2.21 (s, 3H), 1.60 (s, 9H).  $^{13}\text{C}$  NMR (151 MHz,  $\text{CDCl}_3$ ):  $\delta$  176.25, 149.44, 137.86, 136.30, 133.58, 128.53, 128.17, 127.37, 125.22, 123.03, 122.27, 119.62, 119.08, 114.63, 112.05, 111.23, 84.13, 46.78, 28.22, 27.81, 21.14. ESI HRMS exact mass calcd. for  $(\text{C}_{23}\text{H}_{24}\text{N}_2\text{O}_3 + \text{Na})^+$  requires  $m/z$  399.1679, found  $m/z$  399.1674.

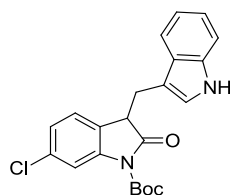

**Tert-butyl**

**3-((1H-indol-3-yl)methyl)-6-chloro-2-oxoindoline-1-carboxylate (1v):**

white solid,  $^1\text{H}$  NMR (600 MHz,  $\text{CDCl}_3$ ):  $\delta$  8.06 (s, 1H), 7.82 (d,  $J = 1.8$  Hz, 1H), 7.62 (d,  $J = 7.9$  Hz, 1H), 7.37 (d,  $J = 8.1$  Hz, 1H), 7.20 (t,  $J = 7.6$  Hz, 1H), 7.12 (t,  $J = 7.5$  Hz, 1H), 6.96 (dd,  $J = 8.0$ , 1.8 Hz, 1H), 6.88 (d,  $J = 2.0$  Hz, 1H), 6.71 (d,  $J =$



8.0 Hz, 1H), 3.88 (dd,  $J = 8.9, 4.5$  Hz, 1H), 3.61 (dd,  $J = 14.5, 4.5$  Hz, 1H), 3.14 (dd,  $J = 14.5, 8.9$  Hz, 1H), 1.61 (s, 9H).  $^{13}\text{C}$  NMR (151 MHz,  $\text{CDCl}_3$ ):  $\delta$  175.53, 149.12, 141.15, 136.34, 133.90, 127.12, 126.43, 125.38, 124.01, 123.17, 122.45, 119.82, 118.96, 115.65, 111.50, 111.35, 84.85, 46.38, 28.16, 27.86. ESI HRMS exact mass calcd. for  $(\text{C}_{22}\text{H}_{21}\text{ClN}_2\text{O}_3 + \text{Na})^+$  requires  $m/z$  419.1133, found  $m/z$  419.1127.

**General procedure for the one-pot stepwise Aldol/Chloroetherification/Aromatization reaction**

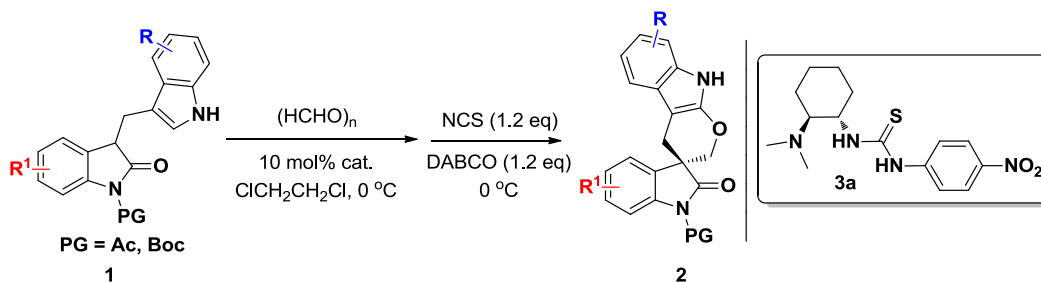

3-(3-indolomethyl)oxindole **1** (0.1 mmol), paraformaldehyde (18 mg, 0.6 mmol) and catalyst **3a** (3.2 mg, 0.01 mmol) were stirred in  $\text{ClCH}_2\text{CH}_2\text{Cl}$  at  $0^\circ\text{C}$  until the reaction finished. Then, DABCO (13.5 mg, 0.12 mmol) and NCS (16 mg, 0.12 mmol) were added and the reaction mixture was vigorously stirred at  $0^\circ\text{C}$  for 30 min. The crude reaction mixture was directly loaded on a silica-gel column and next chromatograph afforded the corresponding product **2**.

**Experiment data for the products 2**

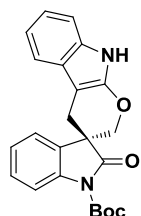

**(R)-tert-butyl**

**2-oxo-4',9'-dihydro-2'H-spiro[indoline-3,3'-pyrano[2,3-b]indole]-1-carboxylate**

**(2a)**: white solid, 31 mg, 79% yield, 95% ee, mp  $142.8\text{--}144.5^\circ\text{C}$ ;  $^1\text{H}$  NMR (300

MHz,  $\text{DMSO-}d_6$ ):  $\delta$  11.20 (s, 1H), 7.85 (d,  $J = 8.1$  Hz, 1H), 7.35 (t,  $J = 7.5$  Hz, 1H),

7.21-7.24 (m, 2H), 7.06 (t,  $J = 7.5$  Hz, 1H), 6.90-6.97 (m, 3H), 4.42 (d,  $J = 10.6$  Hz,

1H), 4.30 (d,  $J = 10.6$  Hz, 1H), 3.11 (d,  $J = 15.0$  Hz, 1H), 2.82 (d,  $J = 15.0$  Hz, 1H), 1.58 (s, 9H);

$^{13}\text{C}$  NMR (75 MHz,  $\text{DMSO-}d_6$ ):  $\delta$  174.53, 148.61, 148.09, 138.69, 130.93, 130.06, 128.49, 126.87,

124.45, 123.50, 119.22, 118.95, 116.25, 114.50, 110.49, 84.07, 83.88, 71.06, 45.23, 28.06, 27.68;

The enantiomeric ratio was determined by HPLC analysis using Daicel Chiralpak OD-H column

(90/10 hexane/*i*-PrOH; flow rate: 1.0 mL/min;  $\lambda = 254$  nm;  $t_{\text{major}} = 20.21$  min,  $t_{\text{minor}} = 12.28$  min);

$[\alpha]_{\text{D}}^{20} = +33.3$  ( $c = 1.25$ ,  $\text{CH}_2\text{Cl}_2$ ); ESI HRMS exact mass calcd. for  $(\text{C}_{23}\text{H}_{22}\text{N}_2\text{O}_4 + \text{H})^+$  requires

$m/z$  391.1652, found  $m/z$  391.1649.

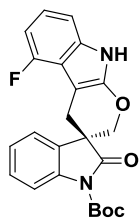

**(R)-tert-butyl**

**5'-fluoro-2-oxo-4',9'-dihydro-2'H-spiro[indoline-3,3'-pyrano[2,3-b]indole]-1-carboxylate (2b):** white solid, 24.5 mg, 60% yield, 89% ee, mp 177.0-178.3 °C; <sup>1</sup>H NMR (300 MHz, DMSO-*d*<sub>6</sub>): δ 11.49 (s, 1H), 7.82 (d, *J* = 8.1 Hz, 1H), 7.32 (t, *J* = 7.6 Hz, 1H), 7.02-7.08 (m, 2H), 6.94-6.96 (m, 1H), 6.87-6.89 (m, 1H), 6.63-6.70 (m, 1H), 4.40 (d, *J* = 10.7 Hz, 1H), 4.28 (d, *J* = 10.7 Hz, 1H), 3.21 (d, *J* = 15.2 Hz, 1H), 2.95 (d, *J* = 15.3 Hz, 1H), 1.54 (s, 9H); <sup>13</sup>C NMR (75 MHz, DMSO-*d*<sub>6</sub>): δ 174.25, 155.15 (d, *J* = 238 Hz), 148.63, 147.81, 138.84, 133.43 (d, *J* = 12.6 Hz), 129.81, 128.56, 124.47, 123.45, 119.47 (d, *J* = 7.8 Hz), 114.93 (d, *J* = 20.1 Hz), 114.58, 107.18, 104.34 (d, *J* = 18.0 Hz), 83.79, 82.09, 70.98, 45.10, 28.90, 27.67; The enantiomeric ratio was determined by HPLC analysis using Daicel Chiralpak AD-H column (90/10 hexane/*i*-PrOH; flow rate: 1.0 mL/min; λ = 254 nm; *t*<sub>major</sub> = 10.97 min, *t*<sub>minor</sub> = 10.23 min); [α]<sub>D</sub><sup>20</sup> = +4.7 (c = 1.0, CH<sub>2</sub>Cl<sub>2</sub>); ESI HRMS exact mass calcd. for (C<sub>23</sub>H<sub>21</sub>FN<sub>2</sub>O<sub>4</sub> + H)<sup>+</sup> requires m/z 409.1558, found m/z 409.1565.

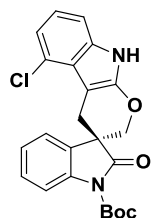

**(R)-tert-butyl**

**5'-chloro-2-oxo-4',9'-dihydro-2'H-spiro[indoline-3,3'-pyrano[2,3-b]indole]-1-carboxylate (2c):** white solid, 24.2 mg, 57% yield, 87% ee, mp 188.1-189.7 °C; <sup>1</sup>H NMR (300 MHz, DMSO-*d*<sub>6</sub>): δ 11.59 (s, 1H), 7.85 (d, *J* = 8.1 Hz, 1H), 7.34-7.39 (m, 1H), 7.18-7.21 (m, 1H), 7.08-7.13 (m, 1H), 7.01 (d, *J* = 6.8 Hz, 1H), 6.92-6.94 (m, 2H), 4.45 (d, *J* = 10.7 Hz, 1H), 4.32 (d, *J* = 10.7 Hz, 1H), 3.36 (d, *J* = 15.4 Hz, 1H), 3.18 (d, *J* = 15.4 Hz, 1H), 1.57 (s, 9H); <sup>13</sup>C NMR (75 MHz, DMSO-*d*<sub>6</sub>): δ 174.27, 148.83, 148.62, 138.84, 132.02, 129.83, 128.60, 124.51, 124.12, 123.50, 122.49, 119.99, 119.26, 114.59, 109.63, 84.08, 83.81, 70.78, 45.07, 29.47, 27.68; The enantiomeric ratio was determined by HPLC analysis using Daicel Chiralpak AD-H column (90/10 hexane/*i*-PrOH; flow rate: 1.0 mL/min; λ = 254 nm; *t*<sub>major</sub> = 6.18 min, *t*<sub>minor</sub> = 7.47 min); [α]<sub>D</sub><sup>20</sup> = -9.3 (c = 0.9, CH<sub>2</sub>Cl<sub>2</sub>); ESI HRMS exact mass calcd. for (C<sub>23</sub>H<sub>21</sub>ClN<sub>2</sub>O<sub>4</sub> + H)<sup>+</sup> requires m/z 425.1263, found m/z 425.1245.

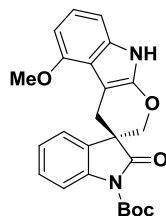

**(R)-tert-butyl**

**5'-methoxy-2-oxo-4',9'-dihydro-2'H-spiro[indoline-3,3'-pyrano[2,3-b]indole]-1-carboxylate (2d):** white solid, 24.0 mg, 57% yield, 88% ee, mp 168.3-169.9 °C; <sup>1</sup>H NMR (300 MHz, DMSO-*d*<sub>6</sub>): δ 11.17 (s, 1H), 7.83 (d, *J* = 8.1 Hz, 1H), 7.35 (t, *J* = 7.5 Hz, 1H), 7.08 (t, *J* = 7.5 Hz, 1H), 6.82-6.94 (m, 3H), 6.43-6.46 (m, 1H), 4.38 (d, *J* = 10.3 Hz, 1H), 4.25 (d, *J* = 10.5 Hz, 1H), 3.71 (s, 3H), 3.25 (d, *J* = 15.5 Hz, 1H), 2.99 (d, *J* = 15.2 Hz, 1H), 1.57 (s, 9H); <sup>13</sup>C NMR (75 MHz, DMSO-*d*<sub>6</sub>): δ 174.56, 152.51, 148.62, 146.39, 138.72, 131.77, 130.16, 128.45, 124.43, 123.51, 119.88, 116.27, 114.49, 104.34, 100.05, 83.81, 83.45, 70.71, 54.97, 45.31, 30.18, 27.69; The enantiomeric ratio was determined by HPLC

analysis using Daicel Chiralpak AD-H column (90/10 hexane/*i*-PrOH; flow rate: 1.0 mL/min;  $\lambda$  = 254 nm;  $t_{\text{major}}$  = 8.11 min,  $t_{\text{minor}}$  = 10.25 min);  $[\alpha]_{\text{D}}^{20}$  = +19.0 ( $c$  = 1.0,  $\text{CH}_2\text{Cl}_2$ ); ESI HRMS exact mass calcd. for  $(\text{C}_{24}\text{H}_{24}\text{N}_2\text{O}_5 + \text{Na})^+$  requires  $m/z$  443.1577, found  $m/z$  443.1566.

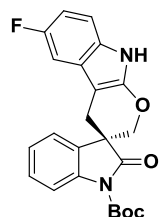

**(R)-tert-butyl**

**6'-fluoro-2-oxo-4',9'-dihydro-2'H-spiro[indoline-3,3'-pyrano[2,3-b]indole]-1-carboxylate (2e):** white solid, 28.1 mg, 69% yield, 95% ee, mp 180.3-181.3 °C;

$^1\text{H}$  NMR (300 MHz,  $\text{DMSO}-d_6$ ):  $\delta$  11.31 (s, 1H), 7.85 (d,  $J$  = 8.0 Hz, 1H), 7.35 (t,  $J$  = 7.5 Hz, 1H), 7.18-7.22 (m, 1H), 7.05-7.09 (m, 1H), 7.01 (dd,  $J$  = 2.5 and 9.9

Hz, 1H), 6.92-6.95 (m, 1H), 6.77 (t,  $J$  = 7.8 Hz, 1H), 4.44 (d,  $J$  = 10.7 Hz, 1H), 4.32 (d,  $J$  = 10.7 Hz, 1H), 3.09 (d,  $J$  = 15.1 Hz, 1H), 2.82 (d,  $J$  = 15.1 Hz, 1H), 1.58 (s, 9H);  $^{13}\text{C}$  NMR (75 MHz,  $\text{DMSO}-d_6$ ):  $\delta$  174.40, 157.25 (d,  $J$  = 229 Hz), 149.61, 148.63, 138.74, 129.89, 128.58, 127.47 (d,  $J$  = 6.6 Hz), 127.37, 124.50, 123.50, 114.56, 111.22 (d,  $J$  = 9.6 Hz), 106.39 (d,  $J$  = 25.1 Hz), 101.78 (d,  $J$  = 23.9 Hz), 84.92 (d,  $J$  = 4.0 Hz), 83.91, 71.11, 45.11, 27.96, 27.68; The enantiomeric ratio was determined by HPLC analysis using Daicel Chiralpak OD-H column (90/10 hexane/*i*-PrOH; flow rate: 1.0 mL/min;  $\lambda$  = 254 nm;  $t_{\text{major}}$  = 13.44 min,  $t_{\text{minor}}$  = 11.48 min);  $[\alpha]_{\text{D}}^{20}$  = +38.4 ( $c$  = 1.2,  $\text{CH}_2\text{Cl}_2$ ); ESI HRMS exact mass calcd. for  $(\text{C}_{23}\text{H}_{21}\text{FN}_2\text{O}_4 + \text{H})^+$  requires  $m/z$  409.1558, found  $m/z$  409.1559.

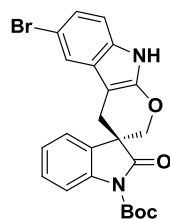

**(R)-tert-butyl**

**6'-bromo-2-oxo-4',9'-dihydro-2'H-spiro[indoline-3,3'-pyrano[2,3-b]indole]-1-**

**-carboxylate (2f):** yellow solid, 33.8 mg, 72% yield, 95% ee, mp 163.4-165.4 °C;  $^1\text{H}$  NMR (300 MHz,  $\text{DMSO}-d_6$ ):  $\delta$  11.44 (s, 1H), 7.84 (d,  $J$  = 8.1 Hz, 1H),

7.34-7.39 (m, 2H), 7.18 (d,  $J$  = 8.5 Hz, 1H), 7.06-7.11 (m, 2H), 6.91-6.93 (m,

1H), 4.45 (d,  $J$  = 10.5 Hz, 1H), 4.32 (d,  $J$  = 10.7 Hz, 1H), 3.08 (d,  $J$  = 15.3 Hz, 1H), 2.84 (d, 15.1 Hz, 1H), 1.57 (s, 9H);  $^{13}\text{C}$  NMR (75 MHz,  $\text{DMSO}-d_6$ ):  $\delta$  174.31, 149.15, 148.59, 138.71, 129.80, 129.65, 128.78, 128.60, 124.52, 123.47, 121.46, 118.55, 114.54, 112.39, 111.59, 84.32, 83.92, 71.11, 44.99, 27.77, 27.68; The enantiomeric ratio was determined by HPLC analysis using Daicel Chiralpak OD-H column (90/10 hexane/*i*-PrOH; flow rate: 1.0 mL/min;  $\lambda$  = 254 nm;  $t_{\text{major}}$  = 14.55 min,  $t_{\text{minor}}$  = 12.81 min);  $[\alpha]_{\text{D}}^{20}$  = +48.5 ( $c$  = 0.73,  $\text{CH}_2\text{Cl}_2$ ); ESI HRMS exact mass calcd. for  $(\text{C}_{23}\text{H}_{21}\text{BrN}_2\text{O}_4 + \text{H})^+$  requires  $m/z$  469.0757, found  $m/z$  469.0748.

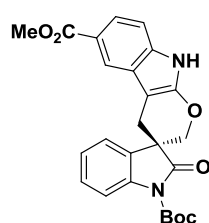

**(R)-1-tert-butyl**

**6'-methyl**

**2-oxo-4',9'-dihydro-2'H-spiro[indoline-3,3'-pyrano[2,3-b]indole]-1,6'-dic**

**arboxylate (2g):** white solid, 22.8 mg, 51% yield, 90% ee, mp 187.8-189.5 °

C;  $^1\text{H}$  NMR (300 MHz,  $\text{DMSO}-d_6$ ):  $\delta$  11.71 (s, 1H), 7.93 (s, 1H), 7.85 (d,  $J$  = 8.1 Hz, 1H), 7.67 (d,  $J$  = 8.4 Hz, 1H), 7.31-7.38 (m, 2H), 7.09 (t,  $J$  = 7.5 Hz,

1H), 6.95 (d,  $J = 7.4$  Hz, 1H), 4.47 (d,  $J = 10.7$  Hz, 1H), 4.35 (d,  $J = 10.7$  Hz, 1H), 3.80 (s, 3H), 3.16 (d,  $J = 15.2$  Hz, 1H), 2.93 (d,  $J = 15.2$  Hz, 1H), 1.57 (s, 9H);  $^{13}\text{C}$  NMR (75 MHz, DMSO- $d_6$ ):  $\delta$  174.31, 167.33, 149.30, 148.63, 138.77, 133.99, 129.82, 128.58, 126.51, 124.51, 123.46, 120.73, 120.44, 118.32, 114.57, 110.33, 85.37, 83.89, 71.24, 51.59, 45.05, 27.67, 27.57; The enantiomeric ratio was determined by HPLC analysis using Daicel Chiralpak OD-H column (90/10 hexane/*i*-PrOH; flow rate: 1.0 mL/min;  $\lambda = 254$  nm;  $t_{\text{major}} = 32.04$  min,  $t_{\text{minor}} = 29.60$  min);  $[\alpha]_{\text{D}}^{20} = +41.3$  (c = 0.35,  $\text{CH}_2\text{Cl}_2$ ); ESI HRMS exact mass calcd. for  $(\text{C}_{25}\text{H}_{24}\text{N}_2\text{O}_6 + \text{Na})^+$  requires  $m/z$  471.1527, found  $m/z$  471.1525.

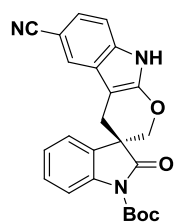

**(R)-tert-butyl**

**6'-cyano-2-oxo-4',9'-dihydro-2'H-spiro[indoline-3,3'-pyrano[2,3-b]indole]-1-carboxylate (2h):** white solid, 24.9 mg, 60% yield, 95% ee, mp 188.5-190.2 °C;

$^1\text{H}$  NMR (300 MHz, DMSO- $d_6$ ):  $\delta$  11.90 (s, 1H), 7.84 (d,  $J = 8.0$  Hz, 1H), 7.74 (s, 1H), 7.32-7.40 (m, 3H), 7.10 (t,  $J = 7.4$  Hz, 1H), 6.96 (d,  $J = 7.4$  Hz, 1H),

4.50 (d,  $J = 10.7$  Hz, 1H), 4.36 (d,  $J = 10.8$  Hz, 1H), 3.11 (d,  $J = 15.3$  Hz, 1H), 2.90 (d,  $J = 15.3$  Hz, 1H), 1.57 (s, 9H);  $^{13}\text{C}$  NMR (75 MHz, DMSO- $d_6$ ):  $\delta$  174.20, 149.89, 148.59, 138.79, 133.15, 129.59, 128.70, 126.85, 124.58, 123.47, 122.55, 121.05, 120.93, 114.59, 111.50, 100.95, 85.27, 83.95, 71.22, 44.80, 27.68, 27.60; The enantiomeric ratio was determined by HPLC analysis using Daicel Chiralpak OD-H column (90/10 hexane/*i*-PrOH; flow rate: 1.0 mL/min;  $\lambda = 254$  nm;  $t_{\text{major}} = 26.02$  min,  $t_{\text{minor}} = 22.55$  min);  $[\alpha]_{\text{D}}^{20} = +45.7$  (c = 0.5,  $\text{CH}_2\text{Cl}_2$ ); ESI HRMS exact mass calcd. for  $(\text{C}_{24}\text{H}_{21}\text{N}_3\text{O}_4 + \text{Na})^+$  requires  $m/z$  438.1424, found  $m/z$  438.1407.

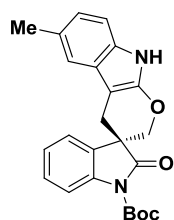

**(R)-tert-butyl**

**6'-methyl-2-oxo-4',9'-dihydro-2'H-spiro[indoline-3,3'-pyrano[2,3-b]indole]-1-carboxylate (2i):** white solid, 29.1 mg, 72% yield, 96% ee, mp 176.9-179.2 °C;

$^1\text{H}$  NMR (300 MHz, DMSO- $d_6$ ):  $\delta$  10.99 (s, 1H), 7.80 (d,  $J = 8.0$  Hz, 1H), 7.31 (t,  $J = 7.5$  Hz, 1H), 6.96-7.07 (m, 3H), 6.84 (d,  $J = 7.7$  Hz, 1H), 6.74 (d,  $J =$

8.0 Hz, 1H), 4.21-4.34 (m, 2H), 3.04 (d,  $J = 15.2$  Hz, 1H), 2.74 (d,  $J = 15.3$  Hz, 1H), 2.27 (s, 3H), 1.54 (s, 9H);  $^{13}\text{C}$  NMR (75 MHz, DMSO- $d_6$ ):  $\delta$  174.59, 148.61, 148.20, 138.67, 130.12, 129.13, 128.49, 127.39, 127.08, 124.46, 123.50, 120.49, 116.28, 114.51, 110.22, 83.91, 83.67, 71.05, 45.30, 28.05, 27.70, 21.34; The enantiomeric ratio was determined by HPLC analysis using Daicel Chiralpak AD-H column (90/10 hexane/*i*-PrOH; flow rate: 1.0 mL/min;  $\lambda = 254$  nm;  $t_{\text{major}} = 7.45$  min,  $t_{\text{minor}} = 13.54$  min);  $[\alpha]_{\text{D}}^{20} = +56.2$  (c = 0.9,  $\text{CH}_2\text{Cl}_2$ ); ESI HRMS exact mass calcd. for  $(\text{C}_{24}\text{H}_{24}\text{N}_2\text{O}_4 + \text{Na})^+$  requires  $m/z$  427.1628, found  $m/z$  427.1610.

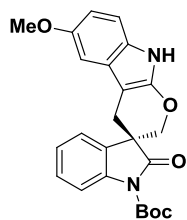

**(R)-tert-butyl**

**6'-methoxy-2-oxo-4',9'-dihydro-2'H-spiro[indoline-3,3'-pyrano[2,3-b]indole]-1-carboxylate (2j):** white solid, 26 mg, 62% yield, 94% ee, mp 180.5-182.3

°C; <sup>1</sup>H NMR (300 MHz, DMSO-*d*<sub>6</sub>): δ 10.99 (s, 1H), 7.84 (d, *J* = 8.1 Hz, 1H),

7.36 (t, *J* = 7.8 Hz, 1H), 7.05-7.33 (m, 2H), 6.91 (d, *J* = 7.5 Hz, 1H), 6.77 (d, *J*

= 2.3 Hz, 1H), 6.59 (dd, *J* = 8.6 and 2.4 Hz, 1H), 4.41 (d, *J* = 10.7 Hz, 1H), 4.28 (d, *J* = 10.7 Hz,

1H), 3.69 (s, 3H), 3.09 (d, *J* = 15.0 Hz, 1H), 2.80 (d, *J* = 15.0 Hz, 1H), 1.58 (s, 3H); <sup>13</sup>C NMR (75

MHz, DMSO-*d*<sub>6</sub>): δ 174.56, 153.54, 148.69, 148.62, 138.69, 130.07, 128.51, 127.46, 125.68,

124.47, 123.53, 114.51, 111.06, 107.76, 99.89, 84.29, 83.91, 71.02, 55.32, 45.27, 28.20, 27.70;

The enantiomeric ratio was determined by HPLC analysis using Daicel Chiralpak AD-H column

(90/10 hexane/*i*-PrOH; flow rate: 1.0 mL/min; λ = 254 nm; *t*<sub>major</sub> = 12.43 min, *t*<sub>minor</sub> = 19.61 min);

[α]<sub>D</sub><sup>20</sup> = +56.6 (c = 1.25, CH<sub>2</sub>Cl<sub>2</sub>); ESI HRMS exact mass calcd. for (C<sub>24</sub>H<sub>24</sub>N<sub>2</sub>O<sub>5</sub> + Na)<sup>+</sup> requires

*m/z* 443.1577, found *m/z* 443.1572.

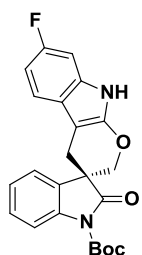

**(R)-tert-butyl**

**7'-fluoro-2-oxo-4',9'-dihydro-2'H-spiro[indoline-3,3'-pyrano[2,3-b]indole]-1-ca**

**rbboxylate (2k):** white solid, 25.7 mg, 63% yield, 95% ee, mp 185.4-186.3 °C; <sup>1</sup>H

NMR (300 MHz, DMSO-*d*<sub>6</sub>): δ 11.34 (s, 1H), 7.84 (d, *J* = 8.0 Hz, 1H), 7.35 (t, *J* =

6.9 Hz, 1H), 7.17-7.21 (m, 1H), 7.00-7.08 (m, 2H), 6.93 (d, *J* = 6.7 Hz, 1H),

6.77-6.81 (m, 1H), 4.41 (d, *J* = 10.6 Hz, 1H), 4.28 (d, *J* = 10.6 Hz, 1H), 3.08 (d, *J* = 15.1 Hz, 1H),

2.82 (d, *J* = 15.0 Hz, 1H), 1.57 (s, 9H); <sup>13</sup>C NMR (75 MHz, DMSO-*d*<sub>6</sub>): δ 174.46, 157.70 (d, *J* =

230 Hz), 148.61, 148.27 (d, *J* = 2.7 Hz), 138.72, 130.82 (d, *J* = 12.4 Hz), 129.97, 128.56, 124.51,

123.56, 123.50, 116.91 (d, *J* = 9.6 Hz), 114.53, 106.62 (d, *J* = 23.3 Hz), 97.32 (d, *J* = 26.0 Hz),

84.08, 83.90, 70.98, 45.12, 27.94, 27.69; The enantiomeric ratio was determined by HPLC

analysis using Daicel Chiralpak AD-H column (90/10 hexane/*i*-PrOH; flow rate: 1.0 mL/min; λ =

254 nm; *t*<sub>major</sub> = 8.66 min, *t*<sub>minor</sub> = 13.37 min); [α]<sub>D</sub><sup>20</sup> = -15.2 (c = 0.65, CH<sub>2</sub>Cl<sub>2</sub>); ESI HRMS exact

mass calcd. for (C<sub>23</sub>H<sub>21</sub>FN<sub>2</sub>O<sub>4</sub> + Na)<sup>+</sup> requires *m/z* 431.1378, found *m/z* 431.1365.

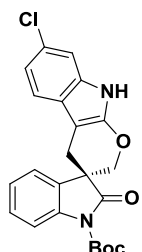

**(R)-tert-butyl**

**7'-chloro-2-oxo-4',9'-dihydro-2'H-spiro[indoline-3,3'-pyrano[2,3-b]indole]-1-ca**

**rbboxylate (2l):** white solid, 29.3 mg, 69% yield, 93% ee, mp 128.0-130.2 °C; <sup>1</sup>H

NMR (300 MHz, DMSO-*d*<sub>6</sub>): δ 11.42 (s, 1H), 7.83 (d, *J* = 8.2 Hz, 1H), 7.36 (t, *J* =

7.6 Hz, 1H), 7.21-7.24 (m, 2H), 7.09 (t, *J* = 7.6 Hz, 1H), 6.91-6.97 (m, 2H), 4.44 (d,

*J* = 10.6 Hz, 1H), 4.31 (d, *J* = 10.8 Hz, 1H), 3.08 (d, *J* = 15.1 Hz, 1H), 2.85 (d, *J* = 15.0 Hz, 1H),

1.57 (s, 1H); <sup>13</sup>C NMR (75 MHz, DMSO-*d*<sub>6</sub>): δ 174.37, 148.76, 148.61, 138.75, 131.40, 129.84,

128.61, 125.69, 124.52, 123.50, 119.10, 117.52, 114.55, 110.23, 84.50, 83.91, 71.06, 45.01, 27.83,

27.69; The enantiomeric ratio was determined by HPLC analysis using Daicel Chiralpak AD-H column (90/10 hexane/*i*-PrOH; flow rate: 1.0 mL/min;  $\lambda = 254$  nm;  $t_{\text{major}} = 9.15$  min,  $t_{\text{minor}} = 13.78$  min);  $[\alpha]_{\text{D}}^{20} = +0.9$  ( $c = 1.0$ ,  $\text{CH}_2\text{Cl}_2$ ); ESI HRMS exact mass calcd. for  $(\text{C}_{23}\text{H}_{21}\text{ClN}_2\text{O}_4 + \text{Na})^+$  requires  $m/z$  447.1082, found  $m/z$  447.1070.

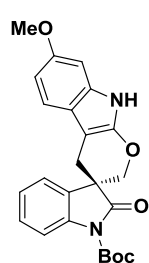

**(R)-tert-butyl**

**7'-methoxy-2-oxo-4',9'-dihydro-2'H-spiro[indoline-3,3'-pyrano[2,3-b]indole]-1-**

**-carboxylate (2m):** white solid, 6.3 mg, 15% yield, 95% ee, mp 261.9-263.4 °C;

$^1\text{H}$  NMR (400 MHz,  $\text{CDCl}_3$ ):  $\delta$  7.90 (d,  $J = 6.4$  Hz, 1H), 7.79 (s, 1H), 7.30 (t,  $J = 6.4$  Hz, 1H), 7.16 (d,  $J = 6.8$  Hz, 1H), 6.99 (t,  $J = 6.0$  Hz, 1H), 6.93-6.94 (m, 1H), 6.84 (s, 1H), 6.75 (d,  $J = 6.4$  Hz, 1H), 4.40 (d,  $J = 8.4$  Hz, 1H), 4.12 (d,  $J = 8.4$  Hz,

1H), 3.83 (s, 3H), 3.35 (d,  $J = 12$  Hz, 1H), 2.76 (d,  $J = 12$  Hz, 1H), 1.66 (s, 9H);  $^{13}\text{C}$  NMR (100 MHz,  $\text{CDCl}_3$ ):  $\delta$  175.65, 155.30, 149.09, 146.59, 138.61, 131.58, 130.32, 128.60, 124.85, 124.07, 121.62, 117.40, 114.86, 108.50, 95.99, 85.30, 84.86, 72.00, 55.94, 46.40, 28.32, 28.13; The enantiomeric ratio was determined by HPLC analysis using Daicel Chiralpak OD-H column (90/10 hexane/*i*-PrOH; flow rate: 1.0 mL/min;  $\lambda = 254$  nm;  $t_{\text{major}} = 14.49$  min,  $t_{\text{minor}} = 13.10$  min);  $[\alpha]_{\text{D}}^{20} = +23.1$  ( $c = 0.55$ ,  $\text{CH}_2\text{Cl}_2$ ); ESI HRMS exact mass calcd. for  $(\text{C}_{24}\text{H}_{24}\text{N}_2\text{O}_5 + \text{H})^+$  requires  $m/z$  421.1758, found  $m/z$  421.1755.

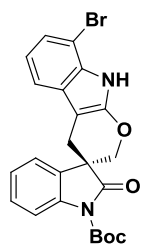

**(R)-tert-butyl**

**8'-bromo-2-oxo-4',9'-dihydro-2'H-spiro[indoline-3,3'-pyrano[2,3-b]indole]-1-ca**

**rboxylate (2n):** white solid, 17.8 mg, 38% yield, 93% ee, mp 178.8-180.5 °C;  $^1\text{H}$

NMR (300 MHz,  $\text{DMSO}-d_6$ ):  $\delta$  11.52 (s, 1H), 7.84 (d,  $J = 8.1$  Hz, 1H), 7.37 (t,  $J = 7.8$  Hz, 1H), 7.24 (d,  $J = 7.6$  Hz, 1H), 7.07-7.17 (m, 2H), 6.86-6.96 (m, 2H), 4.47 (d,

$J = 10.5$  Hz, 1H), 4.33 (d,  $J = 10.7$  Hz, 1H), 3.10 (d,  $J = 15.1$  Hz, 1H), 2.86 (d,  $J = 15.3$  Hz, 1H), 1.57 (s, 9H);  $^{13}\text{C}$  NMR (75 MHz,  $\text{DMSO}-d_6$ ):  $\delta$  174.32, 149.10, 148.60, 138.75, 129.79, 129.46, 128.58, 124.53, 123.49, 121.79, 120.53, 115.67, 114.53, 103.28, 85.62, 83.89, 71.12, 44.93, 27.92, 27.68; The enantiomeric ratio was determined by HPLC analysis using Daicel Chiralpak AD-H column (90/10 hexane/*i*-PrOH; flow rate: 1.0 mL/min;  $\lambda = 254$  nm;  $t_{\text{major}} = 7.56$  min,  $t_{\text{minor}} = 9.66$  min);  $[\alpha]_{\text{D}}^{20} = -14.7$  ( $c = 0.85$ ,  $\text{CH}_2\text{Cl}_2$ ); ESI HRMS exact mass calcd. for  $(\text{C}_{23}\text{H}_{21}\text{BrN}_2\text{O}_4 + \text{Na})^+$  requires  $m/z$  491.0577, found  $m/z$  491.0573.

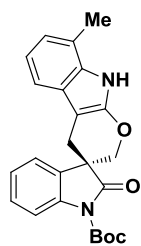

**(R)-tert-butyl**

**8'-methyl-2-oxo-4',9'-dihydro-2'H-spiro[indoline-3,3'-pyrano[2,3-b]indole]-1-c**

**arboxylate (2o):** white solid, 27 mg, 67% yield, 95% ee, mp 161.9-163.5 °C;  $^1\text{H}$

NMR (300 MHz,  $\text{DMSO}-d_6$ ):  $\delta$  11.10 (s, 1H), 7.84 (d,  $J = 8.1$  Hz, 1H), 7.35 (t,  $J = 7.5$  Hz, 1H), 7.03-7.32 (m, 2H), 6.75-6.92 (m, 3H), 4.42 (d,  $J = 10.6$  Hz, 1H), 4.29

(d,  $J = 10.6$  Hz, 1H), 3.10 (d,  $J = 15.0$  Hz, 1H), 2.80 (d,  $J = 15.0$  Hz, 1H), 2.42 (s, 3H), 1.58 (s, 9H);  $^{13}\text{C}$  NMR (75 MHz, DMSO- $d_6$ ):  $\delta$  174.61, 148.62, 148.20, 138.69, 130.21, 130.14, 128.50, 126.53, 124.47, 123.52, 120.28, 119.64, 119.16, 114.52, 113.95, 84.44, 83.90, 71.07, 45.29, 28.19, 27.70, 16.85; The enantiomeric ratio was determined by HPLC analysis using Daicel Chiralpak AD-H column (90/10 hexane/*i*-PrOH; flow rate: 1.0 mL/min;  $\lambda = 254$  nm;  $t_{\text{major}} = 6.44$  min,  $t_{\text{minor}} = 9.83$  min);  $[\alpha]_{\text{D}}^{20} = +7.0$  ( $c = 1.0$ ,  $\text{CH}_2\text{Cl}_2$ ); ESI HRMS exact mass calcd. for  $(\text{C}_{24}\text{H}_{24}\text{N}_2\text{O}_4 + \text{Na})^+$  requires  $m/z$  427.1628, found  $m/z$  427.1623.

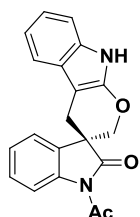

**(R)-1-acetyl-4',9'-dihydro-2'H-spiro[indoline-3,3'-pyrano[2,3-b]indol]-2-one**

**(2p)**: white solid, 21.9 mg, 66% yield, 81% ee, mp 196.8-198.3 °C;  $^1\text{H}$  NMR (300 MHz, DMSO- $d_6$ ):  $\delta$  11.16 (s, 1H), 8.15 (d,  $J = 7.9$  Hz, 1H), 7.30-7.33 (m, 1H), 7.17-7.20 (m, 2H), 7.06-7.09 (m, 1H), 6.89-6.93 (m, 3H), 4.41 (d,  $J = 10.5$  Hz, 1H), 4.30 (d,  $J = 10.6$  Hz, 1H), 3.11 (d,  $J = 15.0$  Hz, 1H), 2.83 (d,  $J = 15.3$  Hz, 1H), 2.46

(s, 3H);  $^{13}\text{C}$  NMR (75 MHz, DMSO- $d_6$ ):  $\delta$  177.19, 170.72, 148.13, 139.39, 130.92, 130.47, 128.47, 126.85, 125.06, 123.38, 119.25, 118.98, 116.24, 115.71, 110.50, 84.08, 71.03, 45.37, 28.05, 26.52; The enantiomeric ratio was determined by HPLC analysis using Daicel Chiralpak OD-H column (90/10 hexane/*i*-PrOH; flow rate: 1.0 mL/min;  $\lambda = 254$  nm;  $t_{\text{major}} = 26.92$  min,  $t_{\text{minor}} = 22.25$  min);  $[\alpha]_{\text{D}}^{20} = +60.7$  ( $c = 0.75$ ,  $\text{CH}_2\text{Cl}_2$ ); ESI HRMS exact mass calcd. for  $(\text{C}_{20}\text{H}_{16}\text{N}_2\text{O}_3 + \text{H})^+$  requires  $m/z$  333.1234, found  $m/z$  333.1243.

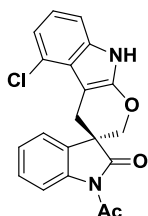

**(R)-1-acetyl-5'-chloro-4',9'-dihydro-2'H-spiro[indoline-3,3'-pyrano[2,3-b]indole]-2-one**

**(2q)**: white solid, 31 mg, 84% yield, 76% ee, mp 223.8-225.1 °C;  $^1\text{H}$  NMR (400 MHz,  $\text{CDCl}_3$ ):  $\delta$  8.30 (d,  $J = 6.4$  Hz, 1H), 7.92 (s, 1H), 7.35 (t,  $J = 6.0$  Hz, 1H), 7.16 (d,  $J = 6.0$  Hz, 1H), 7.10 (t,  $J = 5.6$  Hz, 1H), 6.99-7.02 (m, 3H), 4.41 (d,  $J = 8.0$  Hz, 1H), 4.21 (d,  $J = 8.4$  Hz, 1H), 3.60 (d,  $J = 12.4$  Hz, 1H), 3.30 (d,  $J =$

12.4 Hz, 1H), 2.72 (s, 3H);  $^{13}\text{C}$  NMR (100 MHz,  $\text{CDCl}_3$ ):  $\delta$  177.66, 170.82, 147.82, 139.14, 131.67, 130.17, 128.99, 125.62, 124.96, 124.55, 123.63, 121.01, 120.76, 116.57, 109.09, 85.90, 71.75, 46.27, 29.85, 26.85; The enantiomeric ratio was determined by HPLC analysis using Daicel Chiralpak OD-H column (60/40 hexane/*i*-PrOH; flow rate: 1.0 mL/min;  $\lambda = 254$  nm;  $t_{\text{major}} = 5.25$  min,  $t_{\text{minor}} = 6.17$  min);  $[\alpha]_{\text{D}}^{20} = +27.3$  ( $c = 1.0$ ,  $\text{CH}_2\text{Cl}_2$ ); ESI HRMS exact mass calcd. for  $(\text{C}_{20}\text{H}_{15}\text{ClN}_2\text{O}_3 + \text{Na})^+$  requires  $m/z$  389.0663, found  $m/z$  389.0648;

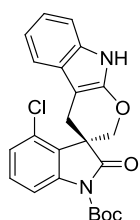

**(R)-tert-butyl**

**4-chloro-2-oxo-4',9'-dihydro-2'H-spiro[indoline-3,3'-pyrano[2,3-b]indole]-1-carboxylate**

**(2r)**: white solid, 34 mg, 80% yield, 94% ee, mp 173.2-175.1 °C;  $^1\text{H}$  NMR (300 MHz, DMSO- $d_6$ ):  $\delta$  11.05 (s, 1H), 7.86 (d,  $J = 8.2$  Hz, 1H), 7.45 (t,  $J = 8.2$  Hz, 1H), 7.29 (d,  $J = 8.2$  Hz, 1H), 7.17-7.23 (m, 2H), 6.92-6.95 (m, 2H), 4.81 (d,

$J = 11.1$  Hz, 1H), 4.53 (d,  $J = 11.1$  Hz, 1H), 3.58 (d,  $J = 15.8$  Hz, 1H), 2.92 (d,  $J = 15.8$  Hz, 1H), 1.52 (s, 9H);  $^{13}\text{C}$  NMR (75 MHz, DMSO- $d_6$ ):  $\delta$  172.32, 148.60, 148.37, 141.55, 130.78, 130.73, 129.43, 126.85, 125.71, 124.59, 118.98, 118.80, 116.10, 113.70, 110.32, 84.07, 83.03, 66.74, 45.62, 27.63, 22.94; The enantiomeric ratio was determined by HPLC analysis using Daicel Chiralpak OD-H column (90/10 hexane/*i*-PrOH; flow rate: 1.0 mL/min;  $\lambda = 254$  nm;  $t_{\text{major}} = 12.66$  min,  $t_{\text{minor}} = 8.47$  min);  $[\alpha]_{\text{D}}^{20} = +25.6$  ( $c = 1.0$ ,  $\text{CH}_2\text{Cl}_2$ ); ESI HRMS exact mass calcd. for  $(\text{C}_{23}\text{H}_{21}\text{ClN}_2\text{O}_4 + \text{H})^+$  requires  $m/z$  425.1263, found  $m/z$  425.1254.

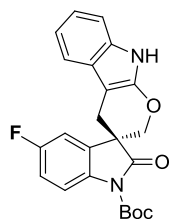

**(R)-tert-butyl**

**5-fluoro-2-oxo-4',9'-dihydro-2'H-spiro[indoline-3,3'-pyrano[2,3-b]indole]-1-carboxylate (2s):** white solid, 24 mg, 59% yield, 92% ee, mp 187.3-189.7 °C;  $^1\text{H}$  NMR (300 MHz, DMSO- $d_6$ ):  $\delta$  11.20 (s, 1H), 7.86 (dd,  $J = 8.8$  and 4.7 Hz, 1H), 7.18-7.25 (m, 3H), 6.91-7.00 (m, 2H), 6.72 (dd,  $J = 8.1$  and 2.7 Hz, 1H), 4.46 (d,  $J = 10.7$  Hz, 1H), 4.31 (d,  $J = 10.8$  Hz, 1H), 3.10 (d,  $J = 15.1$  Hz, 1H), 2.88 (d,  $J = 15.1$  Hz, 1H), 1.57 (s, 9H);  $^{13}\text{C}$  NMR (75 MHz, DMSO- $d_6$ ):  $\delta$  174.05, 159.05 (d,  $J = 238.8$  Hz), 148.58, 147.97, 135.14, 131.88 (d,  $J = 8.5$  Hz), 130.91, 126.76, 119.33, 119.02, 116.30, 116.07 (d,  $J = 8.2$  Hz), 114.88 (d,  $J = 22.4$  Hz), 110.84 (d,  $J = 24.6$  Hz), 110.53, 83.99, 83.90, 70.65, 45.37, 27.85, 27.67; The enantiomeric ratio was determined by HPLC analysis using Daicel Chiralpak AD-H column (90/10 hexane/*i*-PrOH; flow rate: 1.0 mL/min;  $\lambda = 254$  nm;  $t_{\text{major}} = 7.69$  min,  $t_{\text{minor}} = 12.11$  min);  $[\alpha]_{\text{D}}^{20} = +34.9$  ( $c = 0.88$ ,  $\text{CH}_2\text{Cl}_2$ ); ESI HRMS exact mass calcd. for  $(\text{C}_{23}\text{H}_{21}\text{FN}_2\text{O}_4 + \text{Na})^+$  requires  $m/z$  431.1378, found  $m/z$  431.1367.

$J = 10.7$  Hz, 1H), 4.31 (d,  $J = 10.8$  Hz, 1H), 3.10 (d,  $J = 15.1$  Hz, 1H), 2.88 (d,  $J = 15.1$  Hz, 1H), 1.57 (s, 9H);  $^{13}\text{C}$  NMR (75 MHz, DMSO- $d_6$ ):  $\delta$  174.05, 159.05 (d,  $J = 238.8$  Hz), 148.58, 147.97, 135.14, 131.88 (d,  $J = 8.5$  Hz), 130.91, 126.76, 119.33, 119.02, 116.30, 116.07 (d,  $J = 8.2$  Hz), 114.88 (d,  $J = 22.4$  Hz), 110.84 (d,  $J = 24.6$  Hz), 110.53, 83.99, 83.90, 70.65, 45.37, 27.85, 27.67; The enantiomeric ratio was determined by HPLC analysis using Daicel Chiralpak AD-H column (90/10 hexane/*i*-PrOH; flow rate: 1.0 mL/min;  $\lambda = 254$  nm;  $t_{\text{major}} = 7.69$  min,  $t_{\text{minor}} = 12.11$  min);  $[\alpha]_{\text{D}}^{20} = +34.9$  ( $c = 0.88$ ,  $\text{CH}_2\text{Cl}_2$ ); ESI HRMS exact mass calcd. for  $(\text{C}_{23}\text{H}_{21}\text{FN}_2\text{O}_4 + \text{Na})^+$  requires  $m/z$  431.1378, found  $m/z$  431.1367.

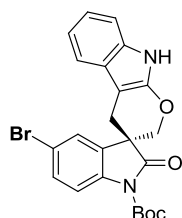

**(R)-tert-butyl**

**5-bromo-2-oxo-4',9'-dihydro-2'H-spiro[indoline-3,3'-pyrano[2,3-b]indole]-1-carboxylate (2t):** white solid, 22 mg, 47% yield, 92% ee, mp 262.0-264.4 °C;  $^1\text{H}$  NMR (300 MHz, DMSO- $d_6$ ):  $\delta$  11.21 (s, 1H), 7.81 (d,  $J = 8.7$  Hz, 1H), 7.55-7.58 (m, 1H), 7.23 (d,  $J = 7.1$  Hz, 2H), 6.94-7.03 (m, 3H), 4.47 (d,  $J = 10.6$  Hz, 1H), 4.30 (d,  $J = 10.6$  Hz, 1H), 3.10 (d,  $J = 15.1$  Hz, 1H), 2.88 (d,  $J = 15.3$  Hz, 1H), 1.57 (s, 9H);  $^{13}\text{C}$  NMR (75 MHz, DMSO- $d_6$ ):  $\delta$  173.69, 148.47, 147.93, 138.26, 132.44, 131.25, 130.89, 126.73, 126.06, 119.38, 119.04, 116.64, 116.39, 116.34, 110.56, 84.17, 83.95, 70.69, 45.28, 27.85, 27.66; The enantiomeric ratio was determined by HPLC analysis using Daicel Chiralpak AD-H column (90/10 hexane/*i*-PrOH; flow rate: 1.0 mL/min;  $\lambda = 254$  nm;  $t_{\text{major}} = 8.91$  min,  $t_{\text{minor}} = 12.63$  min);  $[\alpha]_{\text{D}}^{20} = +110.8$  ( $c = 0.65$ ,  $\text{CH}_2\text{Cl}_2$ ); ESI HRMS exact mass calcd. for  $(\text{C}_{23}\text{H}_{21}\text{BrN}_2\text{O}_4 + \text{Na})^+$  requires  $m/z$  491.0577, found  $m/z$  491.0571.

$J = 10.6$  Hz, 1H), 4.30 (d,  $J = 10.6$  Hz, 1H), 3.10 (d,  $J = 15.1$  Hz, 1H), 2.88 (d,  $J = 15.3$  Hz, 1H), 1.57 (s, 9H);  $^{13}\text{C}$  NMR (75 MHz, DMSO- $d_6$ ):  $\delta$  173.69, 148.47, 147.93, 138.26, 132.44, 131.25, 130.89, 126.73, 126.06, 119.38, 119.04, 116.64, 116.39, 116.34, 110.56, 84.17, 83.95, 70.69, 45.28, 27.85, 27.66; The enantiomeric ratio was determined by HPLC analysis using Daicel Chiralpak AD-H column (90/10 hexane/*i*-PrOH; flow rate: 1.0 mL/min;  $\lambda = 254$  nm;  $t_{\text{major}} = 8.91$  min,  $t_{\text{minor}} = 12.63$  min);  $[\alpha]_{\text{D}}^{20} = +110.8$  ( $c = 0.65$ ,  $\text{CH}_2\text{Cl}_2$ ); ESI HRMS exact mass calcd. for  $(\text{C}_{23}\text{H}_{21}\text{BrN}_2\text{O}_4 + \text{Na})^+$  requires  $m/z$  491.0577, found  $m/z$  491.0571.



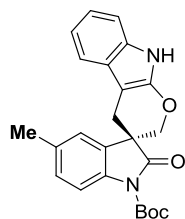

**(R)-tert-butyl**

**5-methyl-2-oxo-4',9'-dihydro-2'H-spiro[indoline-3,3'-pyrano[2,3-b]indole]-**

**1-carboxylate (2u):** white solid, 29 mg, 72% yield, 94% ee, mp 152.7-154.8 °C;

<sup>1</sup>H NMR (300 MHz, DMSO-*d*<sub>6</sub>): δ 11.17 (s, 1H), 7.72 (d, *J* = 8.2 Hz, 1H),

7.15-7.23 (m, 3H), 6.91-6.99 (m, 2H), 6.77 (s, 1H), 4.39 (d, *J* = 10.6 Hz, 1H),

4.26 (d, *J* = 10.6 Hz, 1H), 3.08 (d, *J* = 15.1 Hz, 1H), 2.82 (d, *J* = 15.1 Hz, 1H), 2.16 (s, 3H), 1.56

(s, 9H); <sup>13</sup>C NMR (75 MHz, DMSO-*d*<sub>6</sub>): δ 174.57, 148.66, 148.12, 136.37, 133.47, 130.89, 130.14,

128.89, 126.86, 123.95, 119.24, 118.96, 116.31, 114.36, 110.53, 84.17, 83.77, 71.11, 45.29, 27.97,

27.70, 20.75; The enantiomeric ratio was determined by HPLC analysis using Daicel Chiralpak

AD-H column (90/10 hexane/*i*-PrOH; flow rate: 1.0 mL/min; λ = 254 nm; *t*<sub>major</sub> = 7.99 min, *t*<sub>minor</sub> =

10.20 min); [α]<sub>D</sub><sup>20</sup> = +51.9 (c = 0.9, CH<sub>2</sub>Cl<sub>2</sub>); ESI HRMS exact mass calcd. for (C<sub>24</sub>H<sub>24</sub>N<sub>2</sub>O<sub>4</sub> +

Na)<sup>+</sup> requires *m/z* 427.1628, found *m/z* 427.1628.

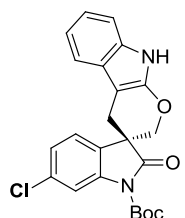

**(R)-tert-butyl**

**6-chloro-2-oxo-4',9'-dihydro-2'H-spiro[indoline-3,3'-pyrano[2,3-b]indole]-1-**

**-carboxylate (2v):** white solid, 21 mg, 59% yield, 93% ee, mp 185.0-186.1 °C;

<sup>1</sup>H NMR (300 MHz, DMSO-*d*<sub>6</sub>): δ 11.21 (s, 1H), 7.87 (d, *J* = 1.9 Hz, 1H),

7.15-7.22 (m, 3H), 6.93-6.99 (m, 2H), 6.89 (d, *J* = 8.1 Hz, 1H), 4.44 (d, *J* = 10.5

Hz, 1H), 4.29 (d, *J* = 10.5 Hz, 1H), 3.10 (d, *J* = 15.1 Hz, 1H), 2.83 (d, *J* = 15.0 Hz, 1H), 1.58 (s,

9H); <sup>13</sup>C NMR (75 MHz, DMSO-*d*<sub>6</sub>): δ 174.09, 148.49, 147.98, 140.09, 132.73, 130.91, 129.00,

126.77, 124.88, 124.22, 119.31, 119.00, 116.27, 114.72, 110.52, 84.32, 83.92, 70.80, 45.14, 27.94,

27.64; The enantiomeric ratio was determined by HPLC analysis using Daicel Chiralpak OD-H

column (90/10 hexane/*i*-PrOH; flow rate: 1.0 mL/min; λ = 254 nm; *t*<sub>major</sub> = 22.02 min, *t*<sub>minor</sub> =

13.05 min); [α]<sub>D</sub><sup>20</sup> = +49.4 (c = 0.85, CH<sub>2</sub>Cl<sub>2</sub>); ESI HRMS exact mass calcd. for (C<sub>23</sub>H<sub>21</sub>ClN<sub>2</sub>O<sub>4</sub> +

Na)<sup>+</sup> requires *m/z* 447.1082, found *m/z* 447.1080.

### General procedure for the one-pot stepwise construction of **4**

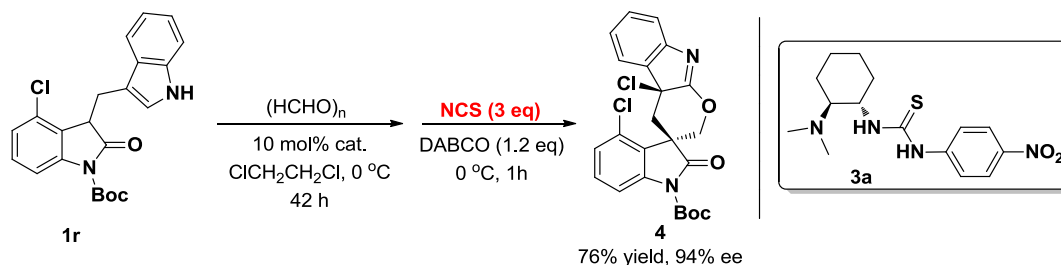

3-(3-(indolomethyl)oxindole) **1r** (0.1 mmol, 39.7 mg), paraformaldehyde (18 mg, 0.6 mmol) and

catalyst **3a** (3.2 mg, 0.01 mmol) were stirred in ClCH<sub>2</sub>CH<sub>2</sub>Cl at 0 °C for 42 h. Then, DABCO

(13.5 mg, 0.12 mmol) and NCS (40 mg, 0.3 mmol) were added and the reaction mixture was

vigorously stirred at 0 °C for 30 min. The crude reaction mixture was directly loaded on a silica-gel column and next chromatograph (PE:EA = 5:1) afforded the corresponding product **4** (white solid, 35 mg) with 76% yield and 94% ee.

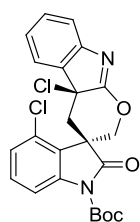

**(3R,4a'S)-tert-butyl**

**4,4a'-dichloro-2-oxo-4',4a'-dihydro-2'H-spiro[indoline-3,3'-pyrano[2,3-b]indole]-1-carboxylate (4):** white solid, mp 171.4-172.9 °C; <sup>1</sup>H NMR (400 MHz, CDCl<sub>3</sub>): δ 7.90 (d, *J* = 6.8 Hz, 1H), 7.42 (d, *J* = 6.4 Hz, 1H), 7.32-7.37 (m, 3H),

7.21 (d, *J* = 6.4 Hz, 1H), 7.11 (t, *J* = 5.6 Hz, 1H), 5.87 (d, *J* = 9.2 Hz, 1H), 4.24 (d, *J*

= 9.6 Hz, 1H), 3.84 (d, *J* = 12.8 Hz, 1H), 2.69 (d, *J* = 12.8 Hz, 1H), 1.57 (s, 9H); <sup>13</sup>C NMR (100 MHz, CDCl<sub>3</sub>): δ 175.66, 173.99, 151.76, 148.76, 141.61, 138.86, 131.19, 130.72, 130.57, 126.33, 124.56, 122.07, 121.85, 120.35, 114.06, 85.69, 67.13, 61.96, 45.96, 36.16, 27.98; [α]<sub>D</sub><sup>20</sup> = -86.4 (c = 1.5, CH<sub>2</sub>Cl<sub>2</sub>); ESI HRMS exact mass calcd. for (C<sub>23</sub>H<sub>20</sub>Cl<sub>2</sub>N<sub>2</sub>O<sub>4</sub> + H)<sup>+</sup> requires *m/z* 459.0873, found *m/z* 459.0878.

The enantiomeric ratio was determined by HPLC analysis of **4** after deprotection of Boc using Daicel Chiralpak OD-H column (70/30 hexane/*i*-PrOH; flow rate: 1.0 mL/min; λ = 254 nm; *t*<sub>major</sub> = 7.40 min, *t*<sub>minor</sub> = 10.63 min).

### Synthesis of bispirooxindole **5**

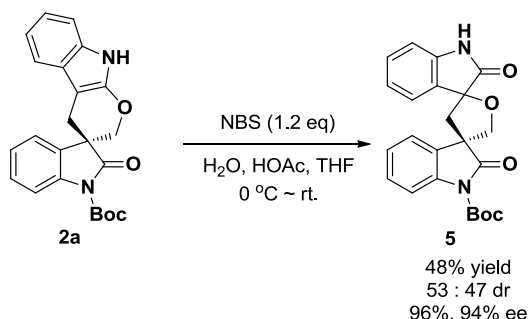

To the solution of **2a** (0.077 mmol, 30 mg) in THF (2 mL), H<sub>2</sub>O (1 mL) and HOAc (1 mL) was added NBS (0.092 mmol, 16.4 mg) at 0 °C, The resulting mixture was warmed to room temperature and vigorously stirred until the slightly red fade away. The mixture was extracted with CH<sub>2</sub>Cl<sub>2</sub> three times, and the combined organic layers were washed with brine and dried over anhydrous Na<sub>2</sub>SO<sub>4</sub>. After filtration, the solution was concentrated under reduced pressure and the resulting crude mixture was purified by silica gel column chromatography (PE:EA = 3:1) to afford compound **5** (white solid, 15 mg) with 48% yield.

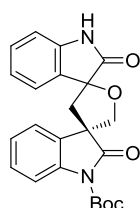

**Tert-butyl(4'R)-2,2''-dioxo-3'H,5'H-dispiro[indoline-3,2'-furan-4'3''-indoline]-1**

**''-carboxylate (5):** white solid, <sup>1</sup>H NMR (400 MHz, CDCl<sub>3</sub>): δ 8.18 (s, 0.4H), 8.03 (d, *J* = 10.0 Hz, 1H), 7.92 (d, *J* = 5.6 Hz, 0.7H), 7.78-7.85 (m, 2H), 7.41 (d, *J* = 6.8

Hz, 0.4H), 7.34 (m, 1H), 7.24-7.30 (m, 2H), 7.11-7.14 (m, 0.7H), 6.88 (d,  $J = 6.4$  Hz, 0.7H), 6.78 (d,  $J = 6.4$  Hz, 0.4H), 4.57-4.60 (m, 1H), 4.48-4.51 (m, 1H), 2.86-2.91 (m, 1H), 2.76-2.79 (m, 1H), 1.68 (s, 9H);  $^{13}\text{C}$  NMR (100 MHz,  $\text{CDCl}_3$ ):  $\delta$  179.11, 178.74, 178.38, 178.34, 149.11, 149.06, 140.81, 139.91, 139.43, 139.35, 133.22, 131.13, 130.29, 129.40, 129.35, 129.31, 128.98, 128.85, 126.32, 125.39, 124.17, 124.08, 123.74, 116.30, 114.96, 114.87, 111.59, 110.01, 84.94, 84.79, 84.33, 84.17, 78.78, 78.32, 55.54, 55.43, 46.70, 46.57, 28.16; The enantiomeric ratio was determined by HPLC analysis using Daicel Chiralpak IC column (90/10 hexane/*i*-PrOH; flow rate: 1.0 mL/min;  $\lambda = 254$  nm;  $t = 10.79, 12.15, 15.68, 18.41$ );  $[\alpha]_{\text{D}}^{20} = -16.2$  ( $c = 0.75, \text{CH}_2\text{Cl}_2$ ); ESI HRMS exact mass calcd. for  $(\text{C}_{23}\text{H}_{22}\text{N}_2\text{O}_5 + \text{Na})^+$  requires  $m/z$  429.1421, found  $m/z$  429.1410.

### Synthesis of compound 6

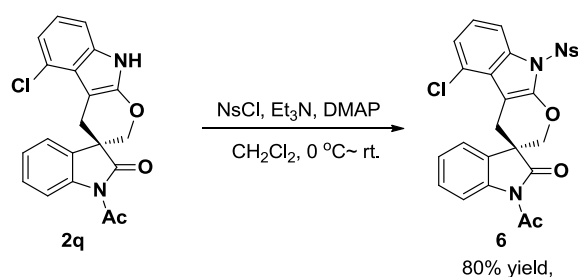

To the solution of **2q** (31 mg, 0.084 mmol) in  $\text{CH}_2\text{Cl}_2$  (4 mL) were added  $\text{Et}_3\text{N}$  (70  $\mu\text{L}$ , 0.5 mmol) and DMAP (2 mg, 0.2 eq), then *p*-nitrobenzene sulfonyl chloride (93 mg, 0.42 mmol) was added to the solution by portion under stirring at  $0^\circ\text{C}$ . The resulting mixture was warmed to room temperature and vigorously stirred until the reaction finished. The reaction was quenched with a saturated  $\text{NH}_4\text{Cl}$  solution, extracted with  $\text{CH}_2\text{Cl}_2$  three times, and the combined organic layers were washed with brine and dried over anhydrous  $\text{Na}_2\text{SO}_4$ . After filtration, the solution was concentrated under reduced pressure and the resulting crude mixture was purified by silica gel column chromatography (PE:EA = 8:1) to afford compound **6** (yellow solid, 37 mg) with 80% yield.

**(R)-1-acetyl-5'-chloro-9'-((4-nitrophenyl)sulfonyl)-4',9'-dihydro-2'H-spiro[indoline-3,3'-pyrano[2,3-b]indol]-2-one (6):** yellow solid, mp 171.5-173.0  $^\circ\text{C}$ ;  $^1\text{H}$  NMR (400 MHz,  $\text{CDCl}_3$ ):  $\delta$  8.28-8.32 (m, 3H), 8.14 (d,  $J = 6.4$  Hz, 2H), 8.07 (d,  $J = 5.6$  Hz, 1H), 7.37 (t,  $J = 6.4$  Hz, 1H), 7.17-7.19 (m, 2H), 7.02 (t,  $J = 6.0$  Hz, 1H), 6.77 (d,  $J = 7.2$  Hz, 1H), 4.31-4.37 (m, 2H), 3.44 (d,  $J = 13.2$  Hz, 1H), 3.20 (d,  $J = 13.2$  Hz, 1H), 2.66 (s, 3H);  $^{13}\text{C}$  NMR (100 MHz,  $\text{CDCl}_3$ ):  $\delta$  176.68, 170.55, 150.99, 146.58, 143.33, 139.30, 132.33, 129.59, 128.88, 128.66, 126.11, 125.59, 125.41, 125.27, 124.60, 124.06, 122.98, 116.92, 112.61, 93.04, 72.41, 45.26, 29.52, 26.75; ESI HRMS exact mass calcd. for  $(\text{C}_{26}\text{H}_{18}\text{ClN}_3\text{O}_7\text{S} +$

Na)<sup>+</sup> requires *m/z* 574.0446, found *m/z* 574.0462.

### synthesis of **1r a**

3-(3-indolomethyl)oxindole **1r** (0.1 mmol, 39.7 mg), paraformaldehyde (18 mg, 0.6 mmol) and catalyst **3a** (3.2 mg, 0.01 mmol) were stirred in DCE (2 mL) at 0 °C for 42 h. Purification of the crude product by flash column chromatography afforded the Aldol product **1r a** (petroleum ether/ethyl acetate as eluent (3:1)).

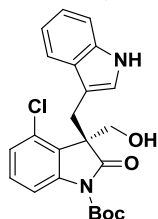

#### (R)-tert-butyl

#### 3-((1H-indol-3-yl)methyl)-4-chloro-3-(hydroxymethyl)-2-oxindoline-1-carbo

**xylate (1r a):** white solid, 95% yield, 92% ee; <sup>1</sup>H NMR (600 MHz, CDCl<sub>3</sub>): δ

7.83 (s, 1H), 7.52 (dd, *J* = 8.6, 5.3 Hz, 2H), 7.18 (d, *J* = 8.0 Hz, 1H), 7.12 (d, *J* = 4.2 Hz, 2H), 7.06 (t, *J* = 7.4 Hz, 1H), 6.99 (t, *J* = 7.4 Hz, 1H), 6.66 (d, *J* = 1.6 Hz,

1H), 4.45 (dd, *J* = 10.9, 3.1 Hz, 1H), 4.30-4.40 (m, 1H), 3.63 (d, *J* = 14.3 Hz, 1H), 3.49 (d, *J* = 14.3 Hz, 1H), 2.04-2.05 (m, 1H), 1.44 (s, 9H). <sup>13</sup>C NMR (151 MHz, CDCl<sub>3</sub>): δ 177.68, 148.53,

142.70, 135.63, 130.29, 129.78, 127.33, 125.60, 125.46, 123.28, 121.88, 119.54, 119.21, 113.57, 110.75, 109.11, 84.50, 64.82, 59.15, 27.97, 27.50. The enantiomeric ratio was determined by

HPLC analysis using Daicel Chiralpak OD-H column (90/10 hexane/*i*-PrOH; flow rate: 1.0 mL/min; λ = 254 nm; *t*<sub>minor</sub> = 20.71 min, *t*<sub>major</sub> = 29.21 min); [α]<sub>D</sub><sup>20</sup> = +97.4 (c = 1.0, CH<sub>2</sub>Cl<sub>2</sub>); ESI HRMS exact mass calcd. for (C<sub>23</sub>H<sub>23</sub>ClN<sub>2</sub>O<sub>4</sub> + Na)<sup>+</sup> requires *m/z* 449.1239, found *m/z* 449.1243.

### X-ray crystal structure of compound **6** and **1r a**

The chemical structure of pentacyclic spirooxindoles **2** has been confirmed by a single crystal X-ray analysis of **6**. And the absolute configuration of the chiral quaternary carbon has been confirmed by a single crystal X-ray analysis of **1ra** (the product of the first Aldol reaction of **1r**).

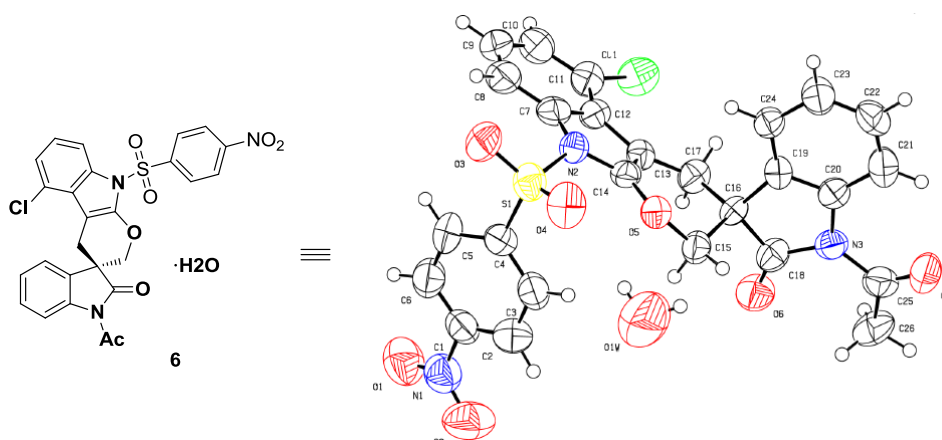

**Table 1.** Crystal data and structure refinement for **6**.

|                     |                                                                    |
|---------------------|--------------------------------------------------------------------|
| Identification code | <b>6</b>                                                           |
| Empirical formula   | C <sub>26</sub> H <sub>20</sub> Cl N <sub>3</sub> O <sub>8</sub> S |

|                                   |                                                                                                                                    |
|-----------------------------------|------------------------------------------------------------------------------------------------------------------------------------|
| Formula weight                    | 569.96                                                                                                                             |
| Temperature                       | 296(2) K                                                                                                                           |
| Wavelength                        | 0.71073 Å                                                                                                                          |
| Crystal system, space group       | Triclinic, P-1                                                                                                                     |
| Unit cell dimensions              | a = 5.6165(18) Å    alpha = 65.52(3) deg.<br>b = 13.983(2) Å    beta = 88.60(3) deg.<br>c = 16.7686(17) Å    gamma = 86.77(3) deg. |
| Volume                            | 1196.6(4) Å <sup>3</sup>                                                                                                           |
| Z, Calculated density             | 2, 1.582 Mg/m <sup>3</sup>                                                                                                         |
| Absorption coefficient            | 0.308 mm <sup>-1</sup>                                                                                                             |
| F(000)                            | 588                                                                                                                                |
| Crystal size                      | 0.26 x 0.21 x 0.17 mm                                                                                                              |
| Theta range for data collection   | 1.60 to 25.00 deg.                                                                                                                 |
| Limiting indices                  | -6 ≤ h ≤ 6, -16 ≤ k ≤ 16, -19 ≤ l ≤ 11                                                                                             |
| Reflections collected / unique    | 6021 / 4185 [R(int) = 0.0828]                                                                                                      |
| Completeness to theta = 25.00     | 99.2 %                                                                                                                             |
| Absorption correction             | Semi-empirical from equivalents                                                                                                    |
| Max. and min. transmission        | 0.9496 and 0.9243                                                                                                                  |
| Refinement method                 | Full-matrix least-squares on F <sup>2</sup>                                                                                        |
| Data / restraints / parameters    | 4185 / 3 / 359                                                                                                                     |
| Goodness-of-fit on F <sup>2</sup> | 0.898                                                                                                                              |
| Final R indices [I > 2σ(I)]       | R1 = 0.0706, wR2 = 0.1010                                                                                                          |
| R indices (all data)              | R1 = 0.2192, wR2 = 0.1237                                                                                                          |
| Extinction coefficient            | 0.0039(8)                                                                                                                          |
| Largest diff. peak and hole       | 0.239 and -0.311 e.Å <sup>-3</sup>                                                                                                 |

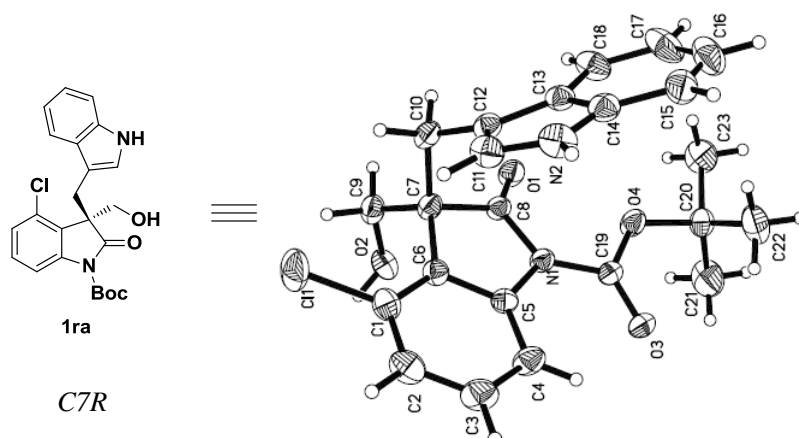

**Table 2.** Crystal data and structure refinement for **1ra**.

|                     |                                                                 |
|---------------------|-----------------------------------------------------------------|
| Identification code | <b>1ra</b>                                                      |
| Empirical formula   | C <sub>23</sub> H <sub>23</sub> ClN <sub>2</sub> O <sub>4</sub> |
| Formula weight      | 426.88                                                          |
| Temperature/K       | 293(2)                                                          |
| Crystal system      | monoclinic                                                      |

|                                             |                                                               |
|---------------------------------------------|---------------------------------------------------------------|
| Space group                                 | P2 <sub>1</sub>                                               |
| a/Å                                         | 8.8442(2)                                                     |
| b/Å                                         | 10.8918(2)                                                    |
| c/Å                                         | 11.5077(3)                                                    |
| α/°                                         | 90                                                            |
| β/°                                         | 90.266(3)                                                     |
| γ/°                                         | 90                                                            |
| Volume/Å <sup>3</sup>                       | 1108.51(5)                                                    |
| Z                                           | 2                                                             |
| ρ <sub>calc</sub> /cm <sup>3</sup>          | 1.279                                                         |
| μ/mm <sup>-1</sup>                          | 1.783                                                         |
| F(000)                                      | 448.0                                                         |
| Crystal size/mm <sup>3</sup>                | 0.2 × 0.15 × 0.12                                             |
| Radiation                                   | CuKα (λ = 1.54184)                                            |
| 2θ range for data collection/°              | 7.682 to 134.056                                              |
| Index ranges                                | -10 ≤ h ≤ 6, -13 ≤ k ≤ 13, -13 ≤ l ≤ 13                       |
| Reflections collected                       | 7923                                                          |
| Independent reflections                     | 3966 [R <sub>int</sub> = 0.0272, R <sub>sigma</sub> = 0.0378] |
| Data/restraints/parameters                  | 3966/1/275                                                    |
| Goodness-of-fit on F <sup>2</sup>           | 1.024                                                         |
| Final R indexes [I ≥ 2σ (I)]                | R <sub>1</sub> = 0.0401, wR <sub>2</sub> = 0.0909             |
| Final R indexes [all data]                  | R <sub>1</sub> = 0.0535, wR <sub>2</sub> = 0.0997             |
| Largest diff. peak/hole / e Å <sup>-3</sup> | 0.13/-0.16                                                    |
| Flack parameter                             | 0.019(11)                                                     |

### Reference

- [1] V. Lanke, K. R. Prabhu, *Org. Lett.* **2013**, *15*, 6262–6265.
- [2] W. Zhang, M.-L. Go, *Bioogan. Med. Chem.* **2009**, *17*, 2077–2090.
- [3] L. Cheng, L. Liu, D. Wang, Y.-J. Chen, *Org. Lett.* **2009**, *11*, 3874–3877.
- [4] W. G. Rajeswaran, L. A. Cohen, *Tetrahedron* **1998**, *54*, 11375-11380.

Copies of NMR and HPLC spectra

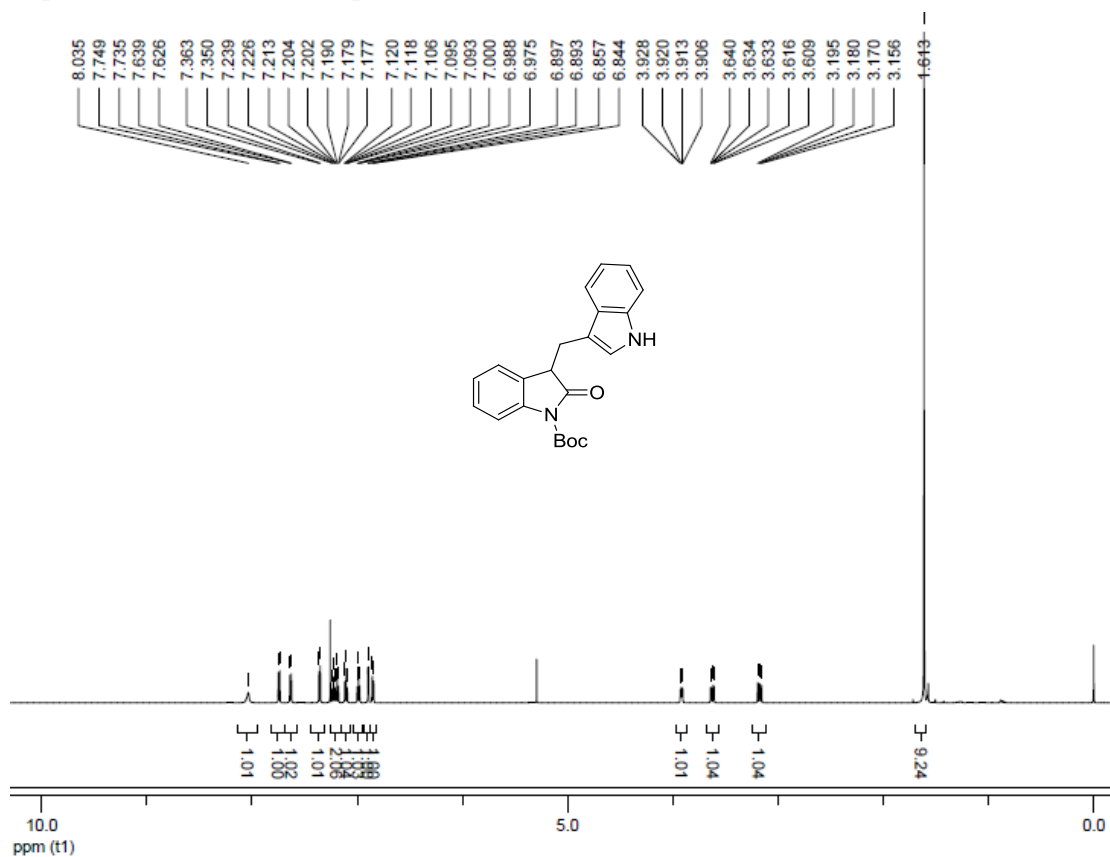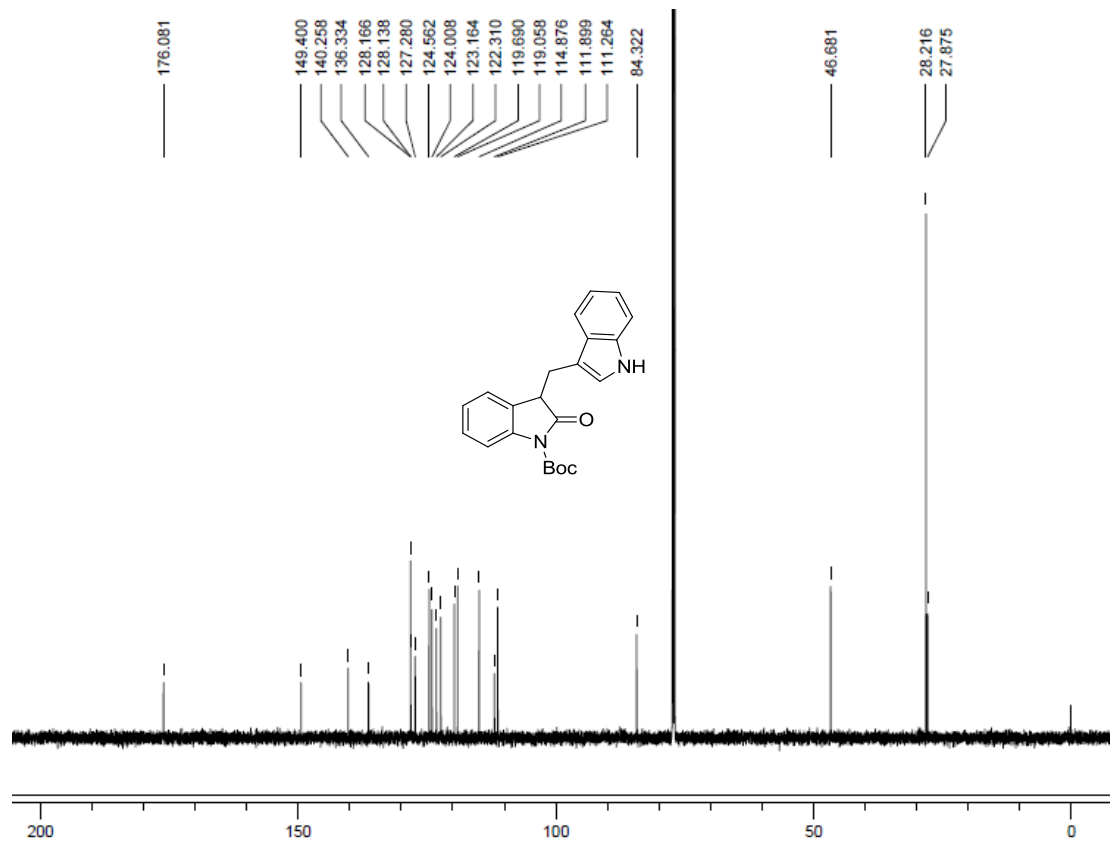





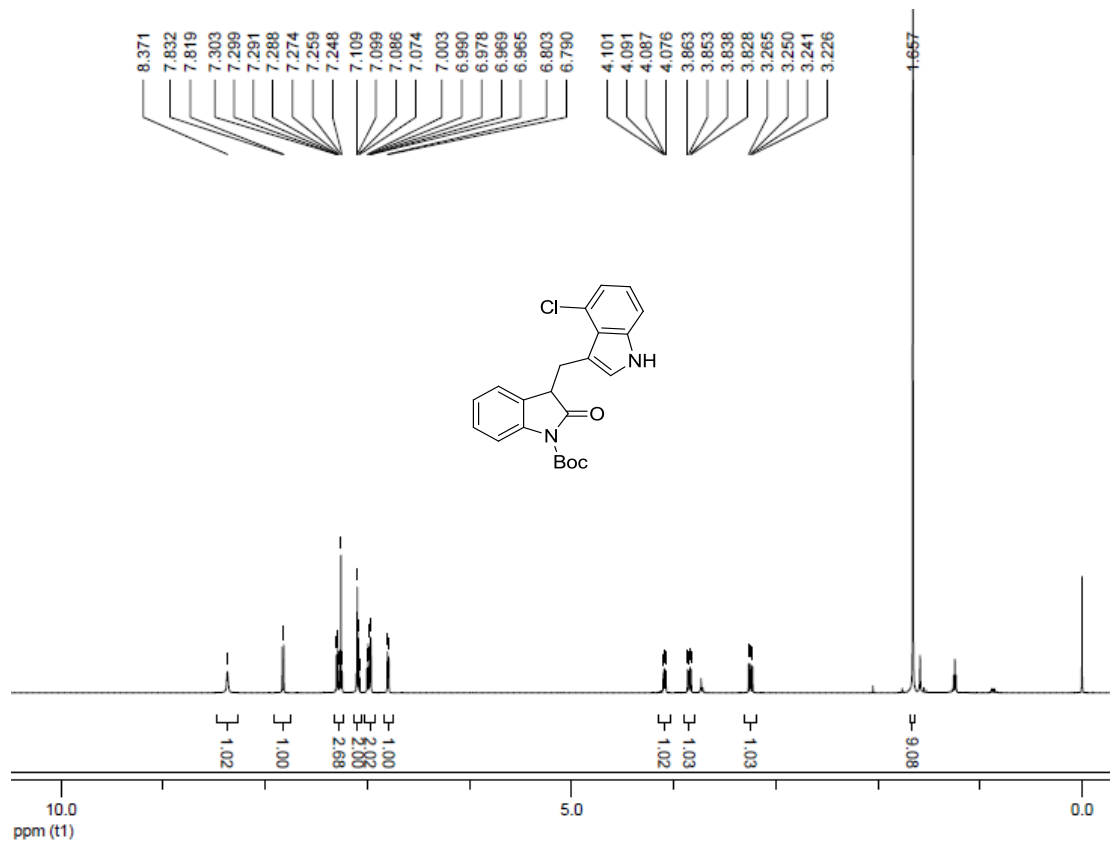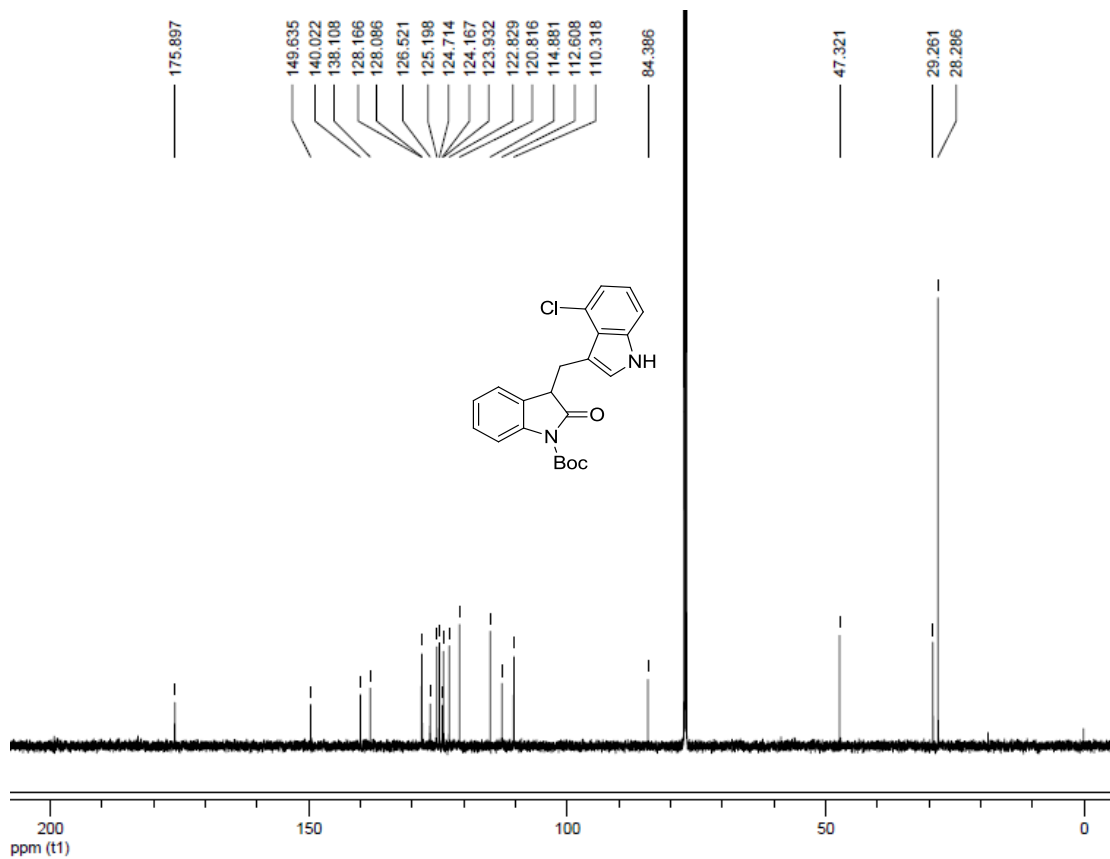



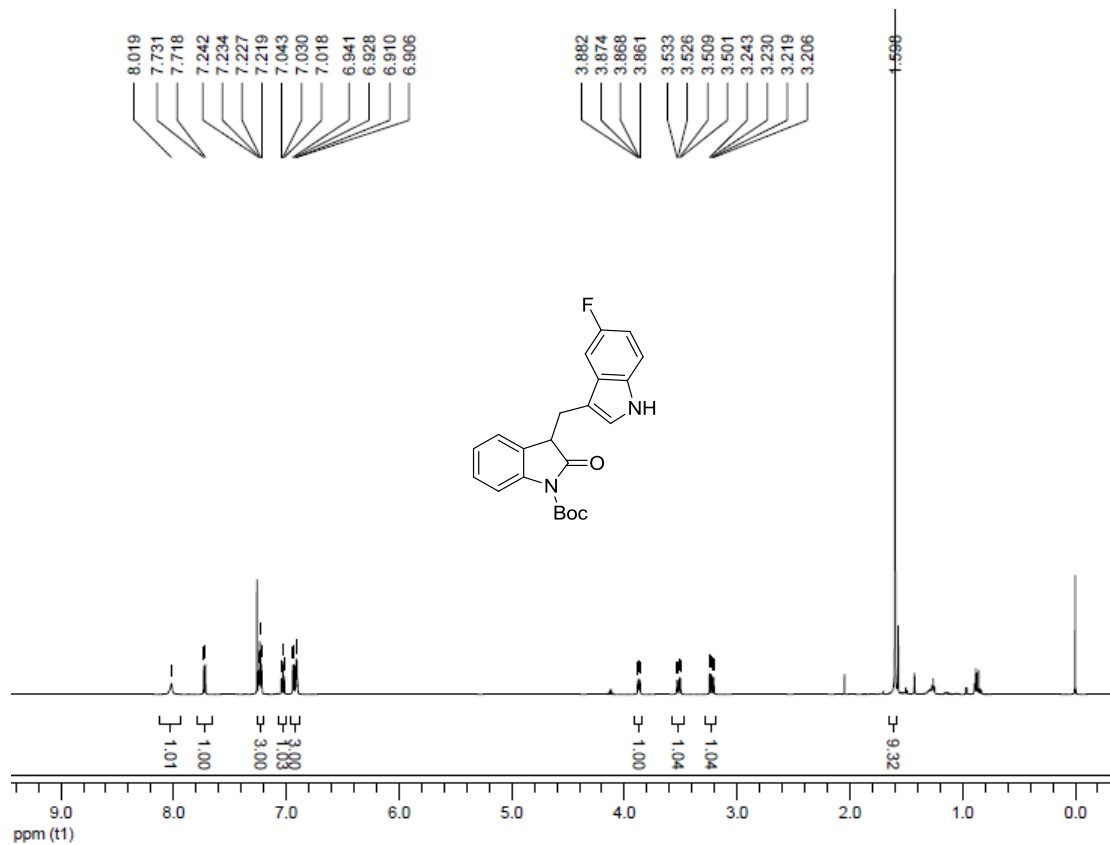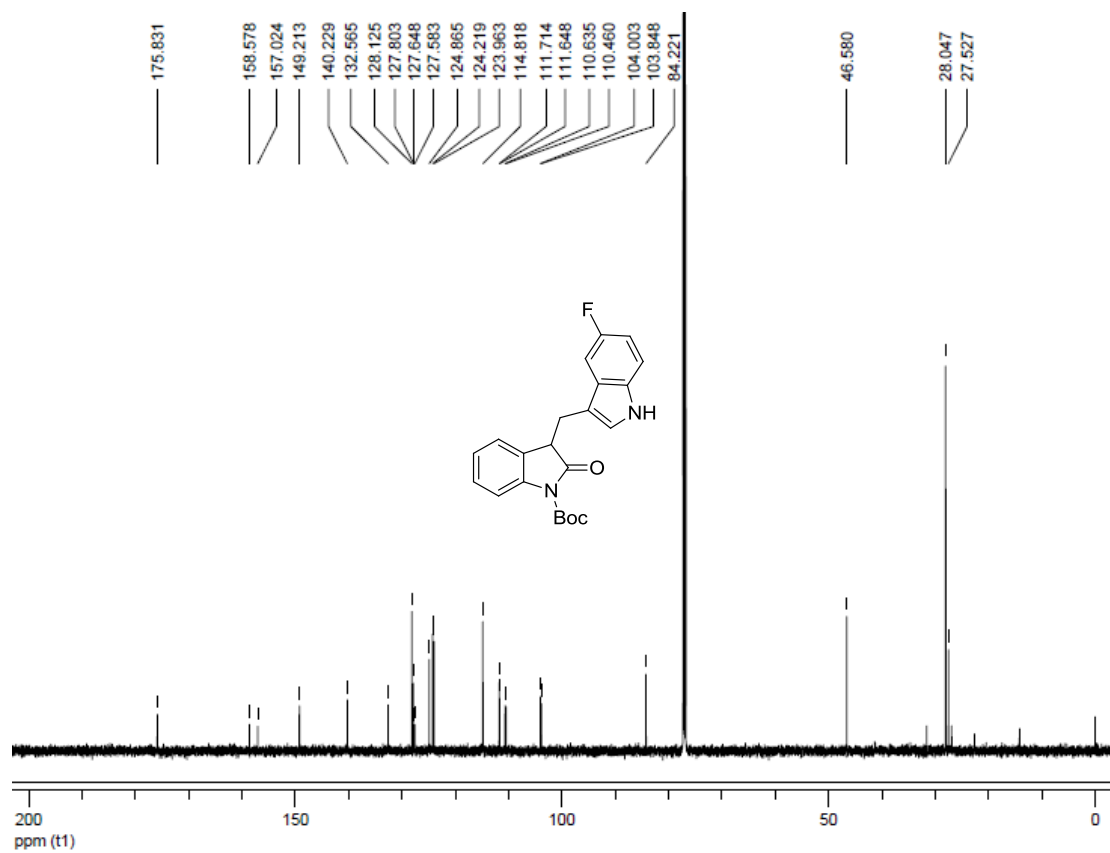

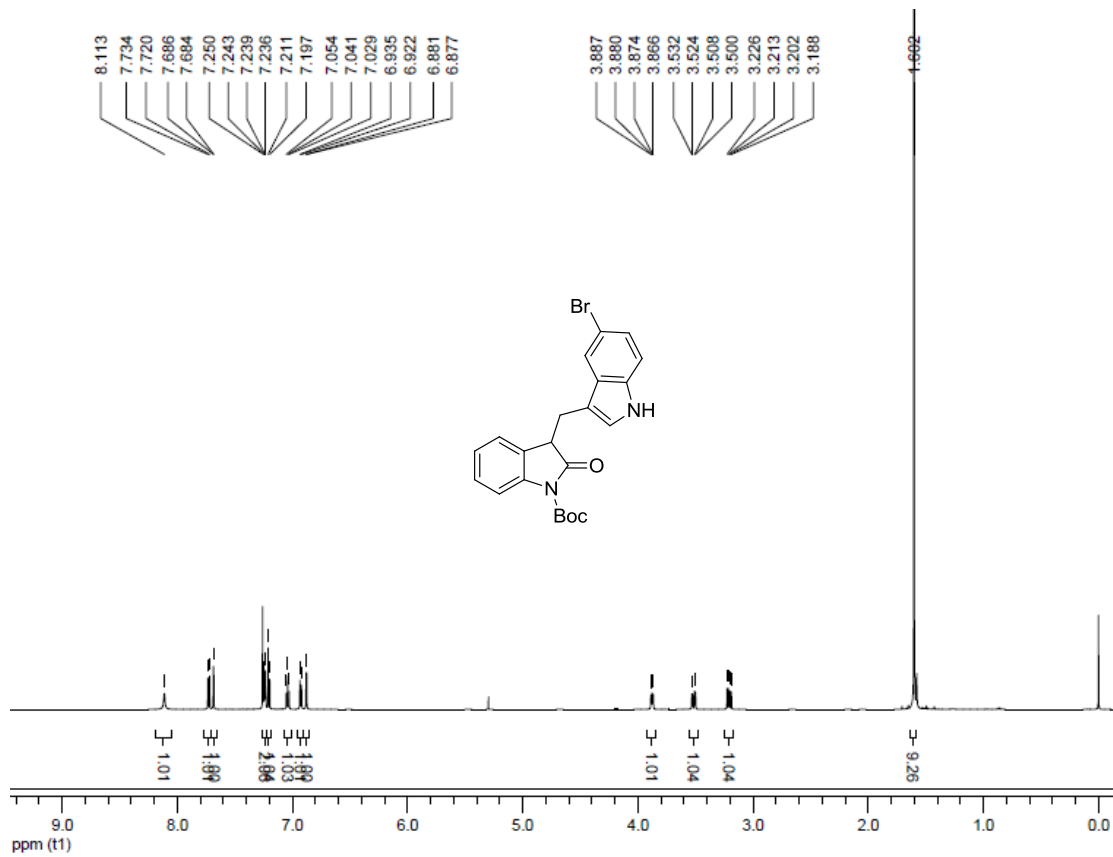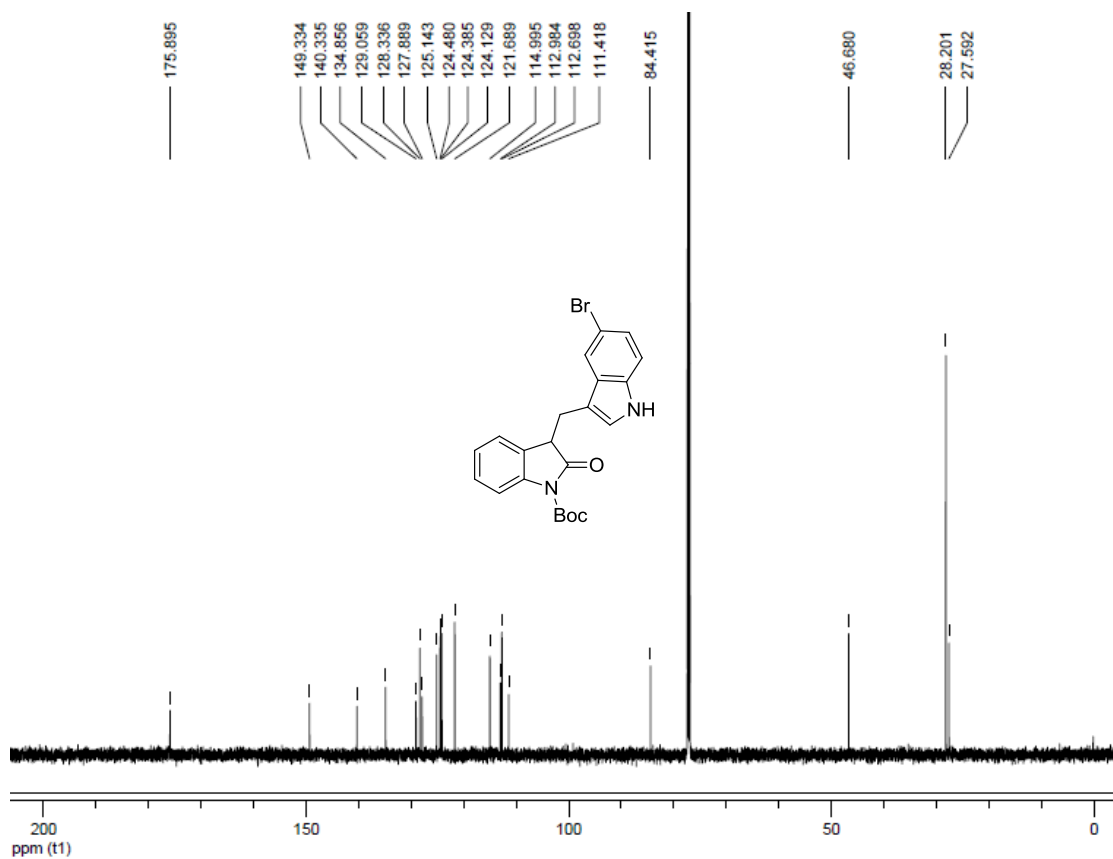

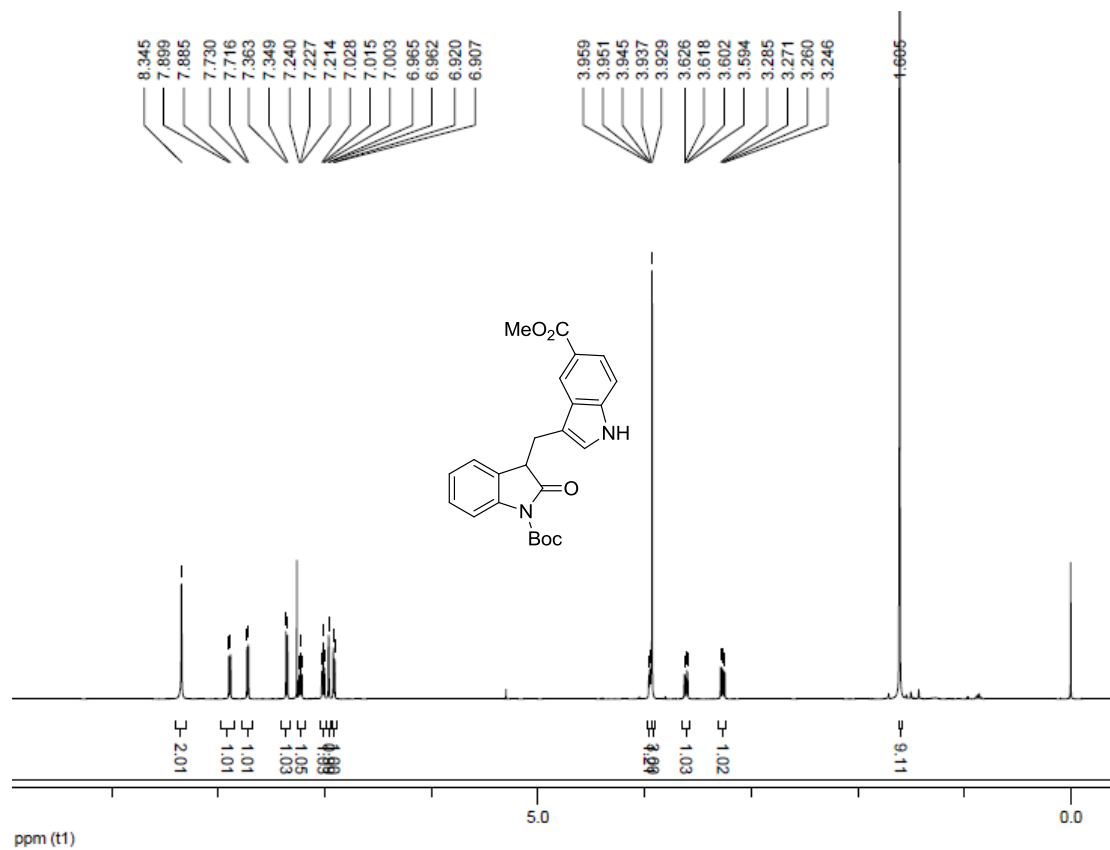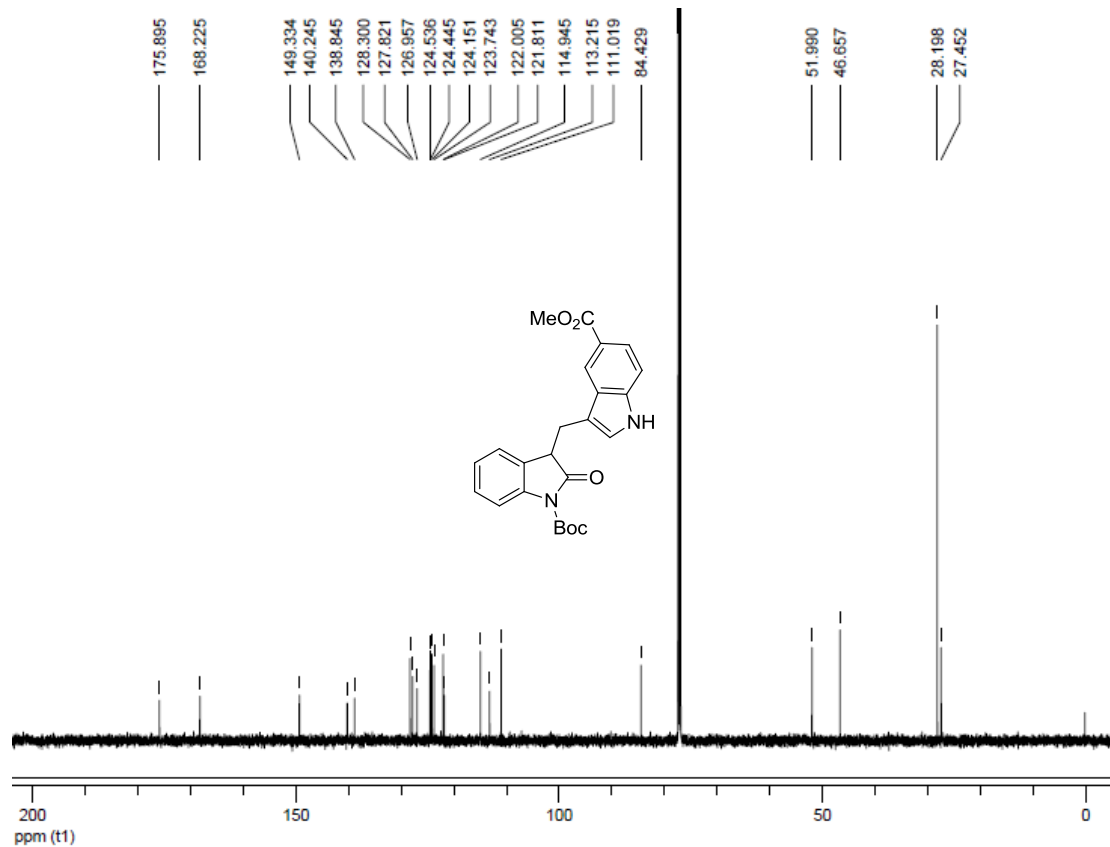

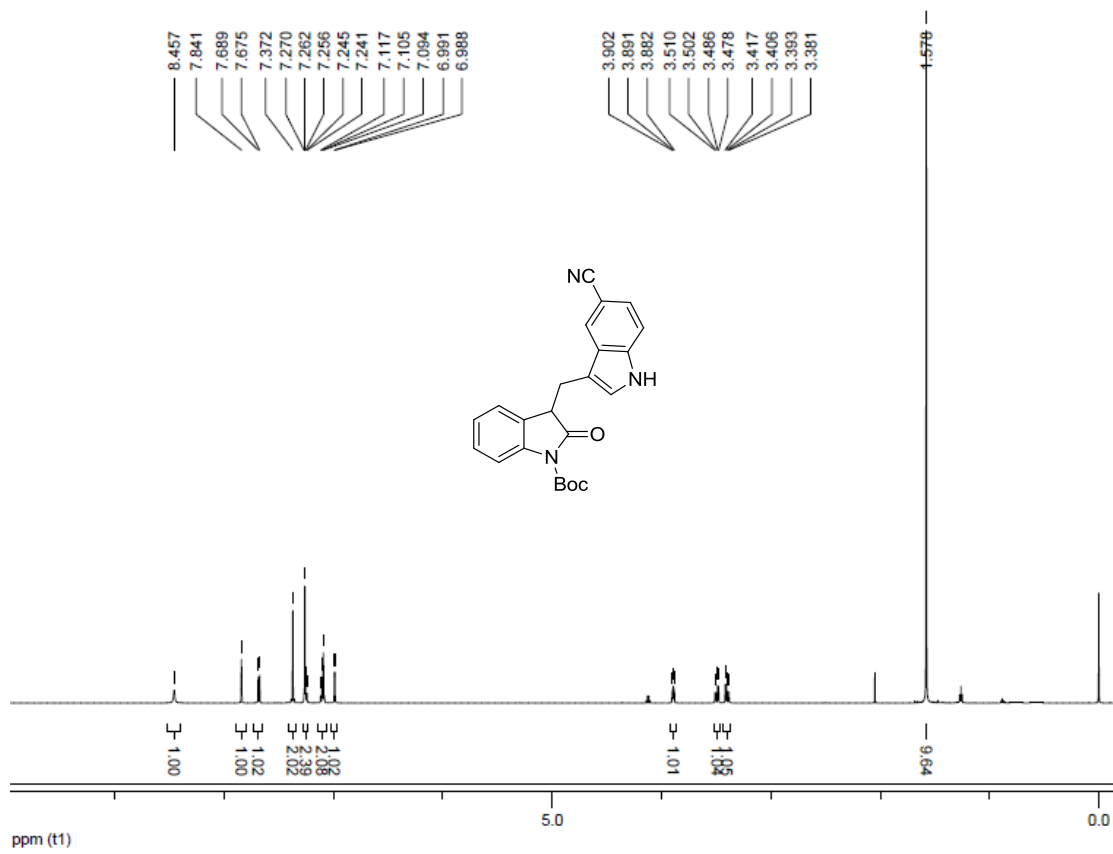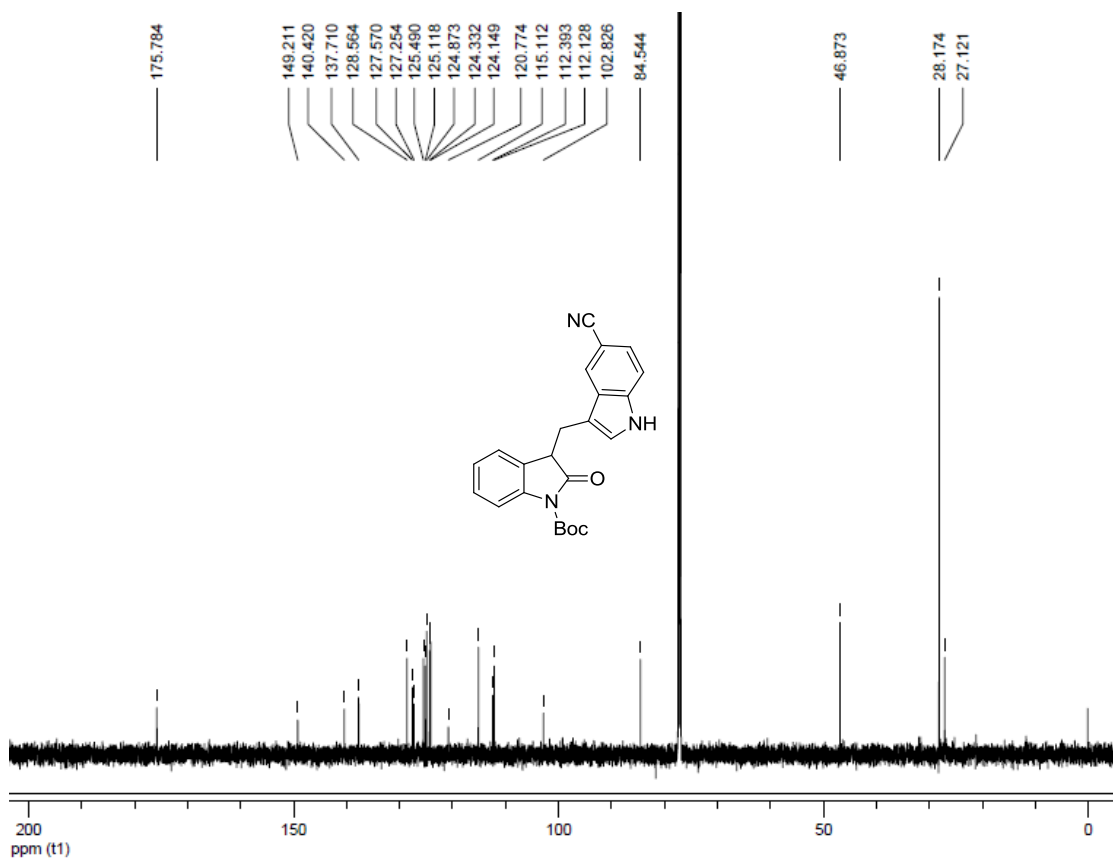

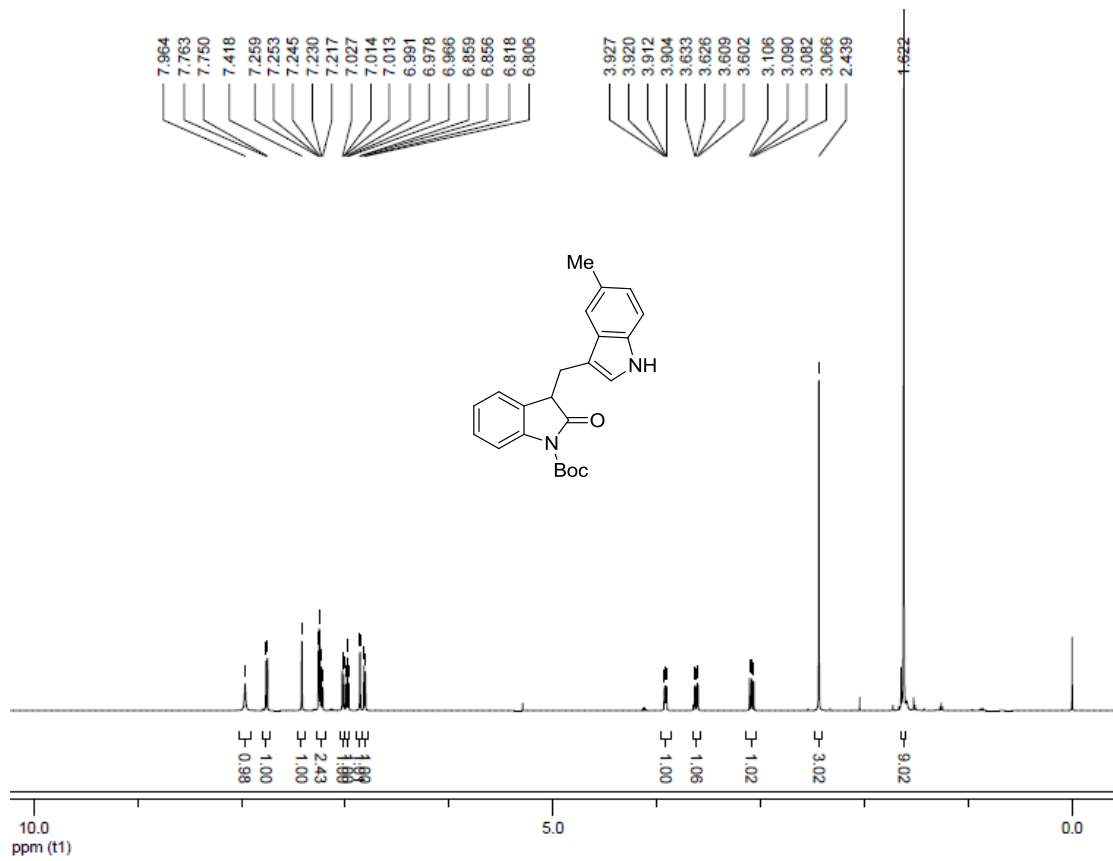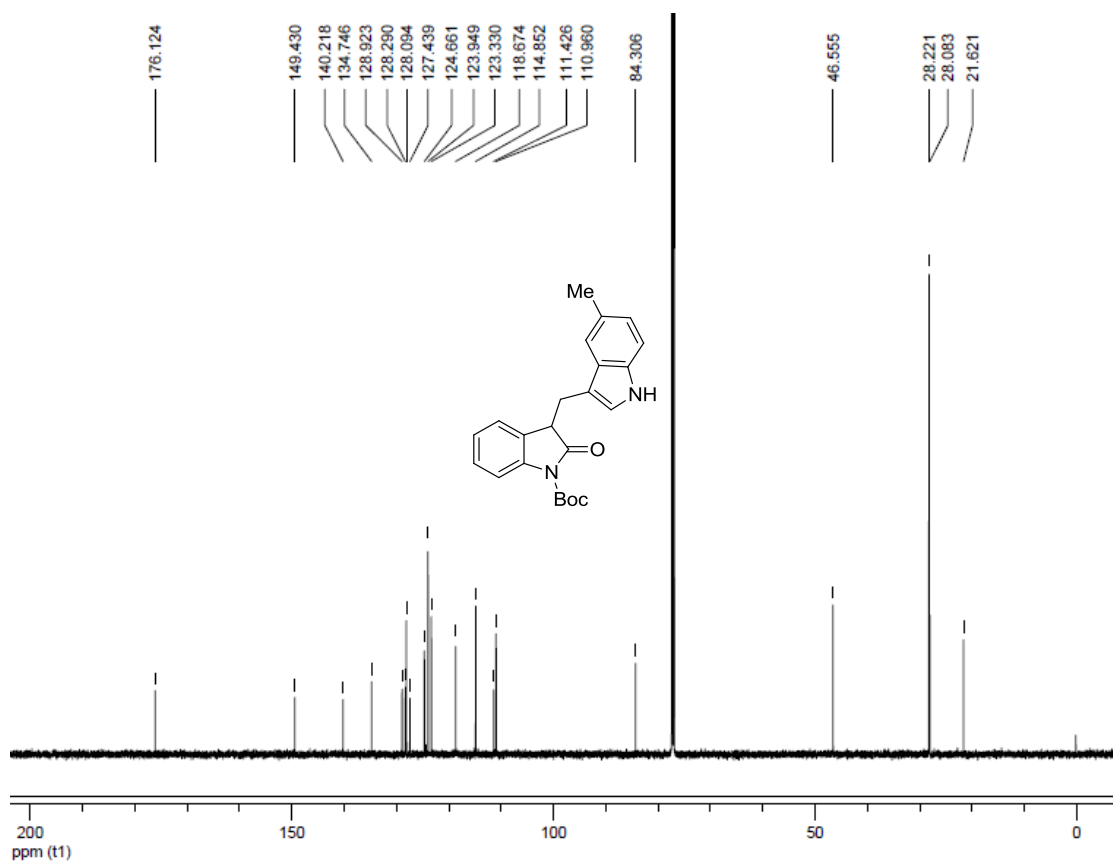

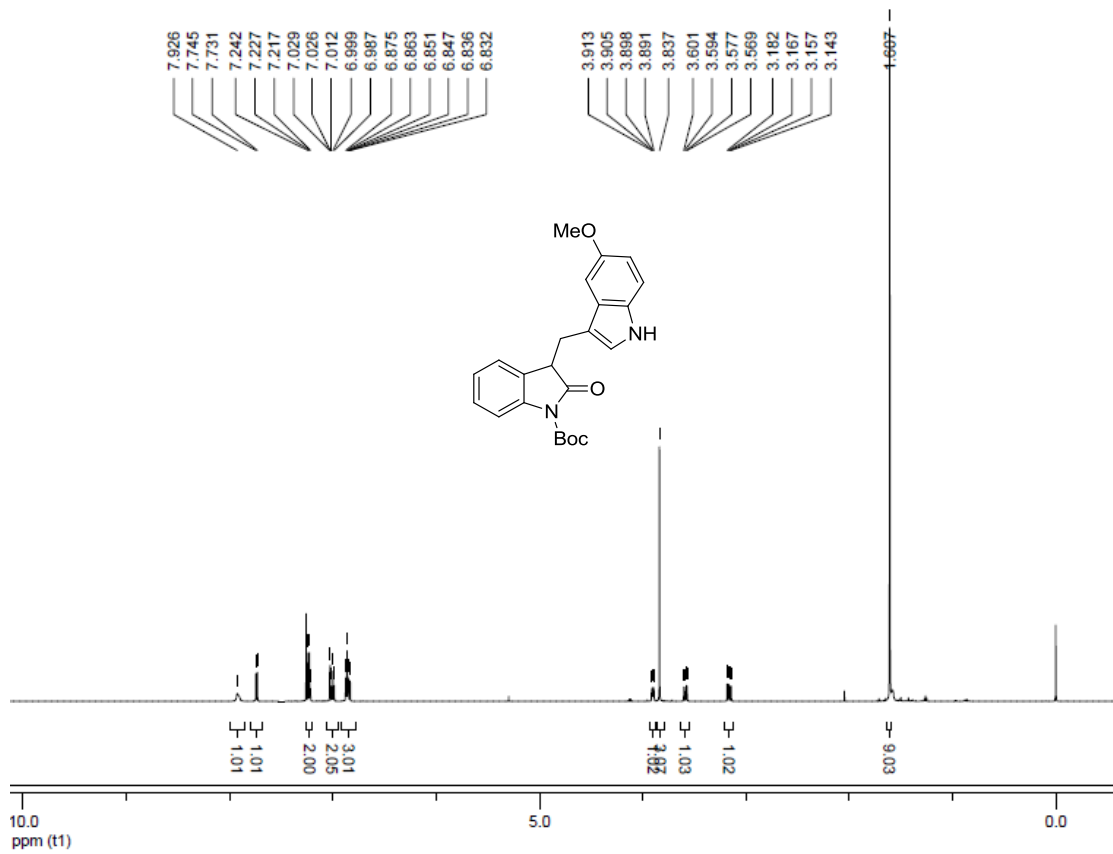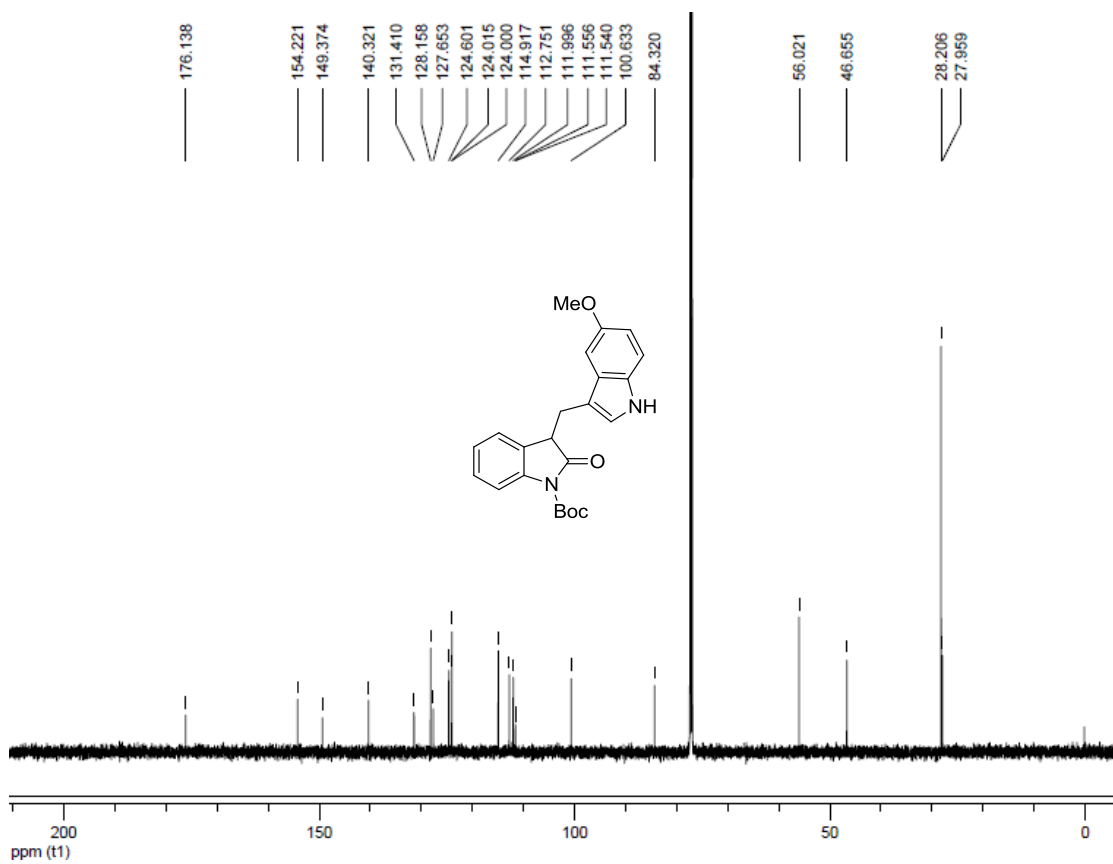



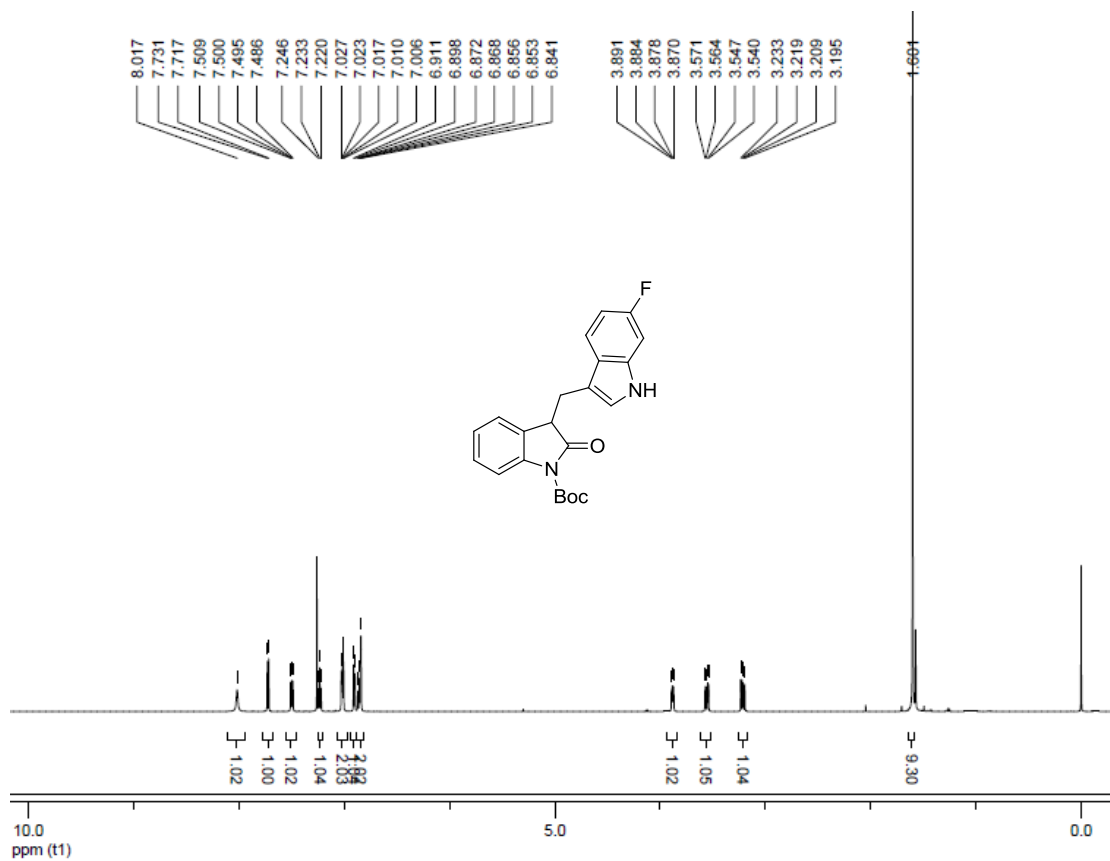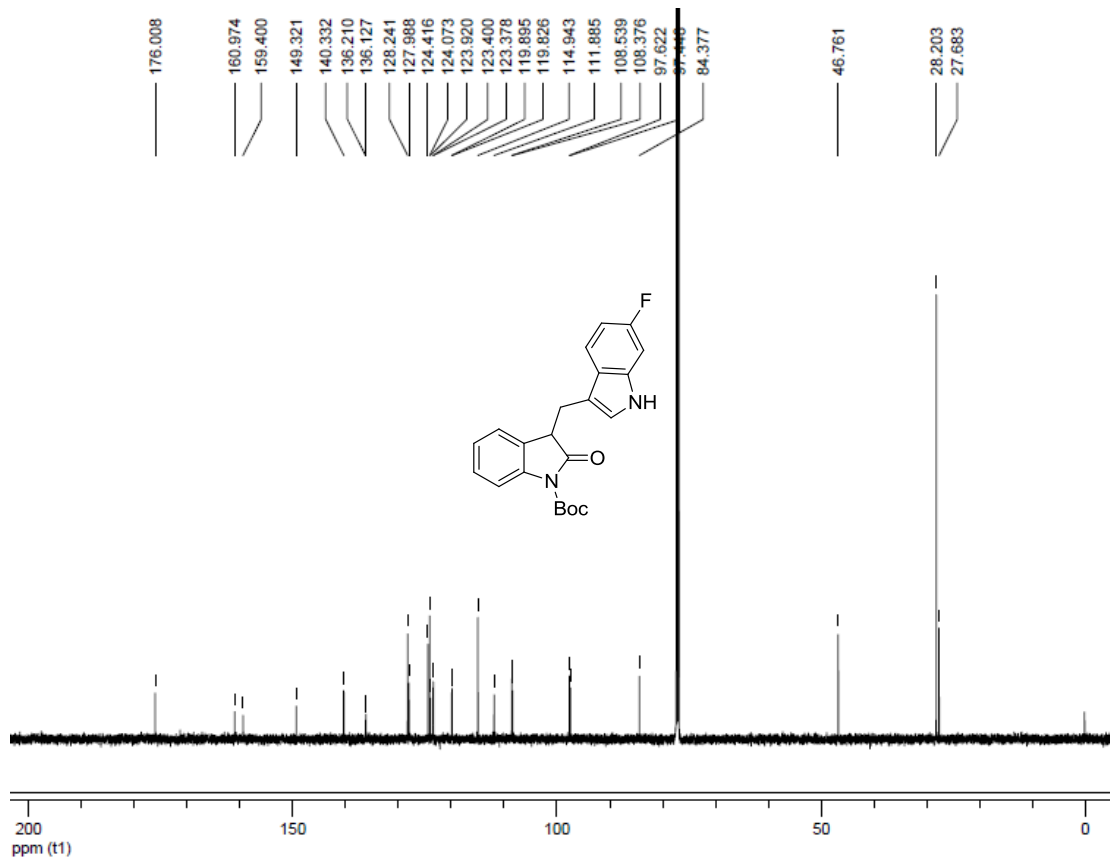

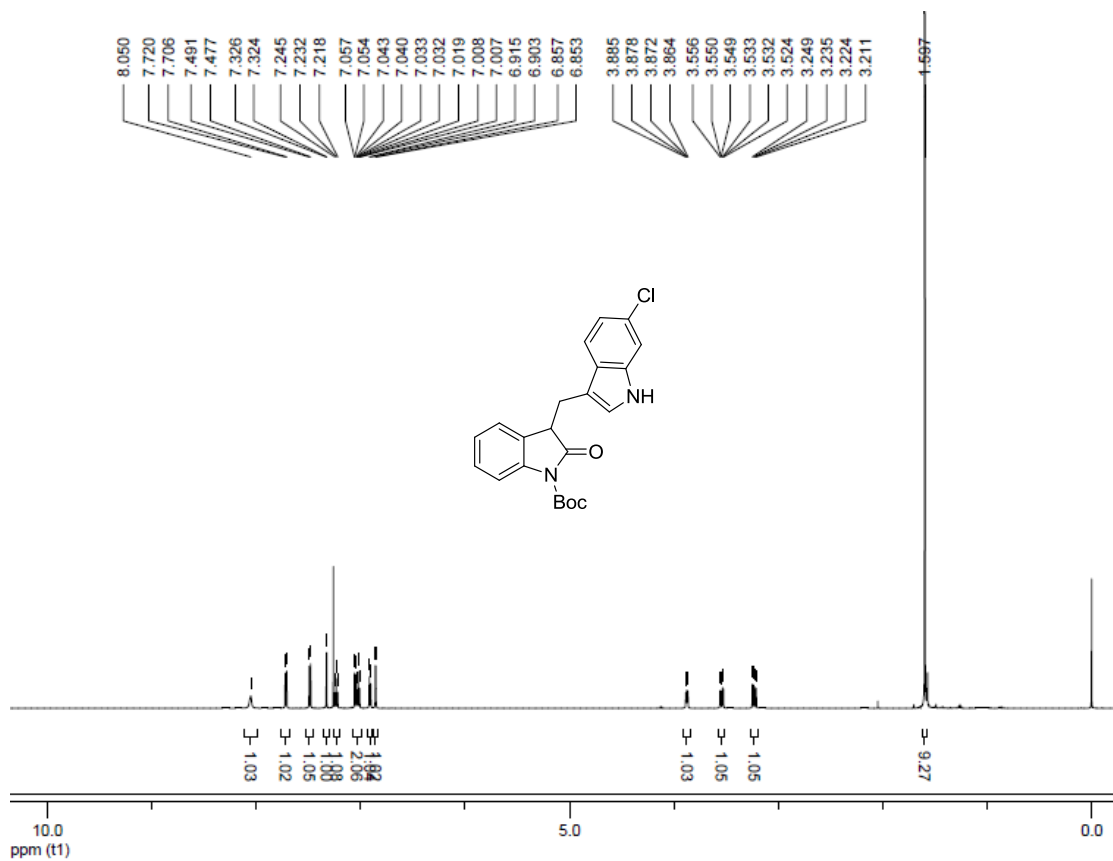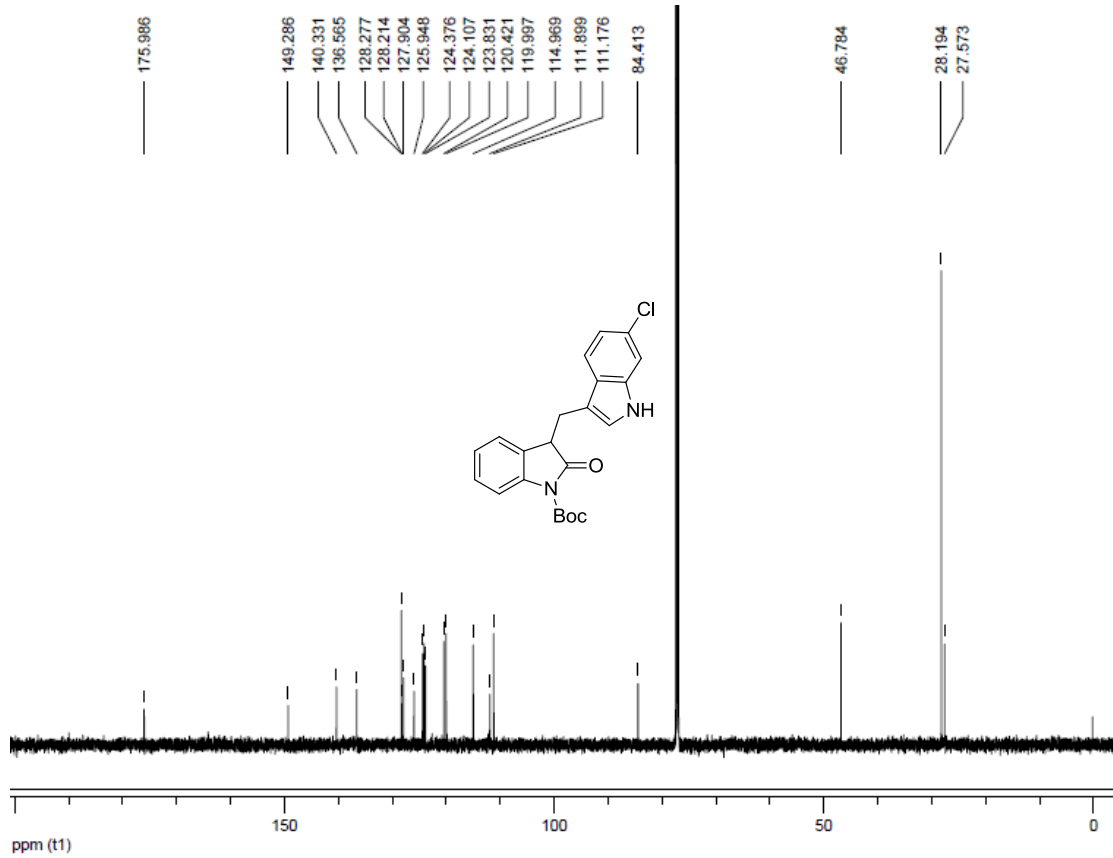

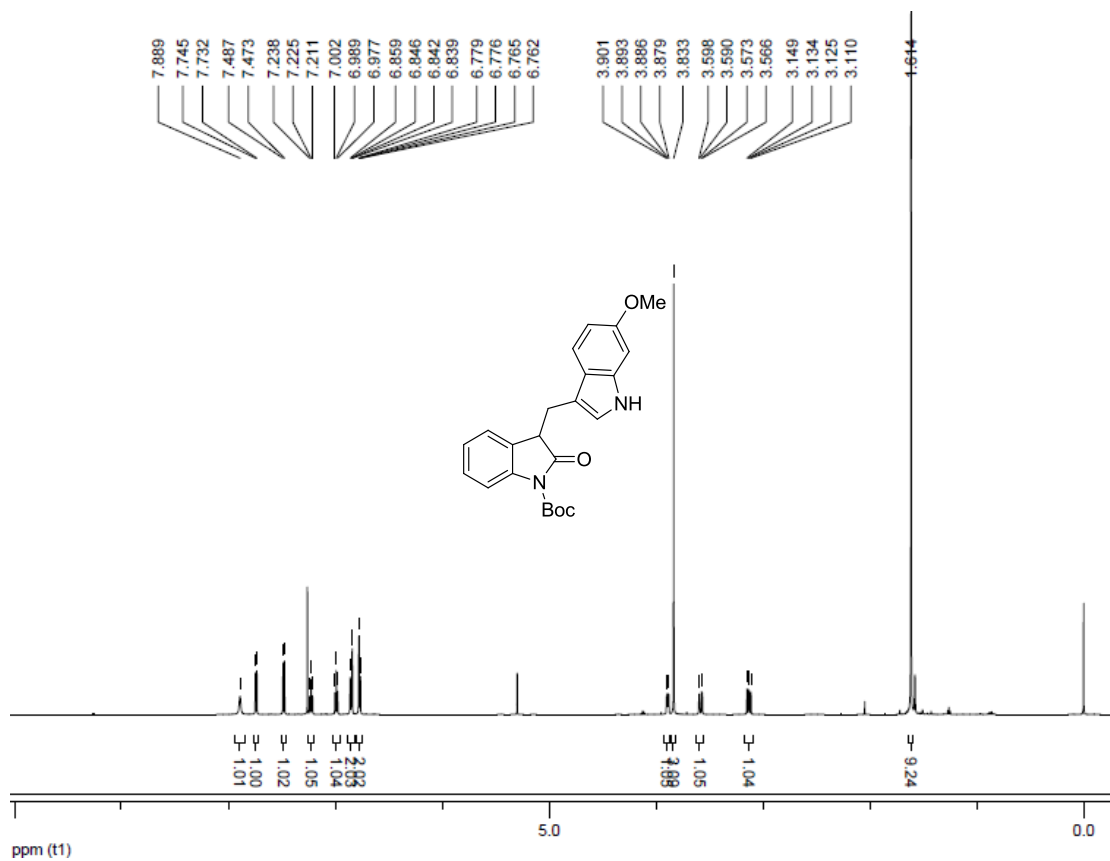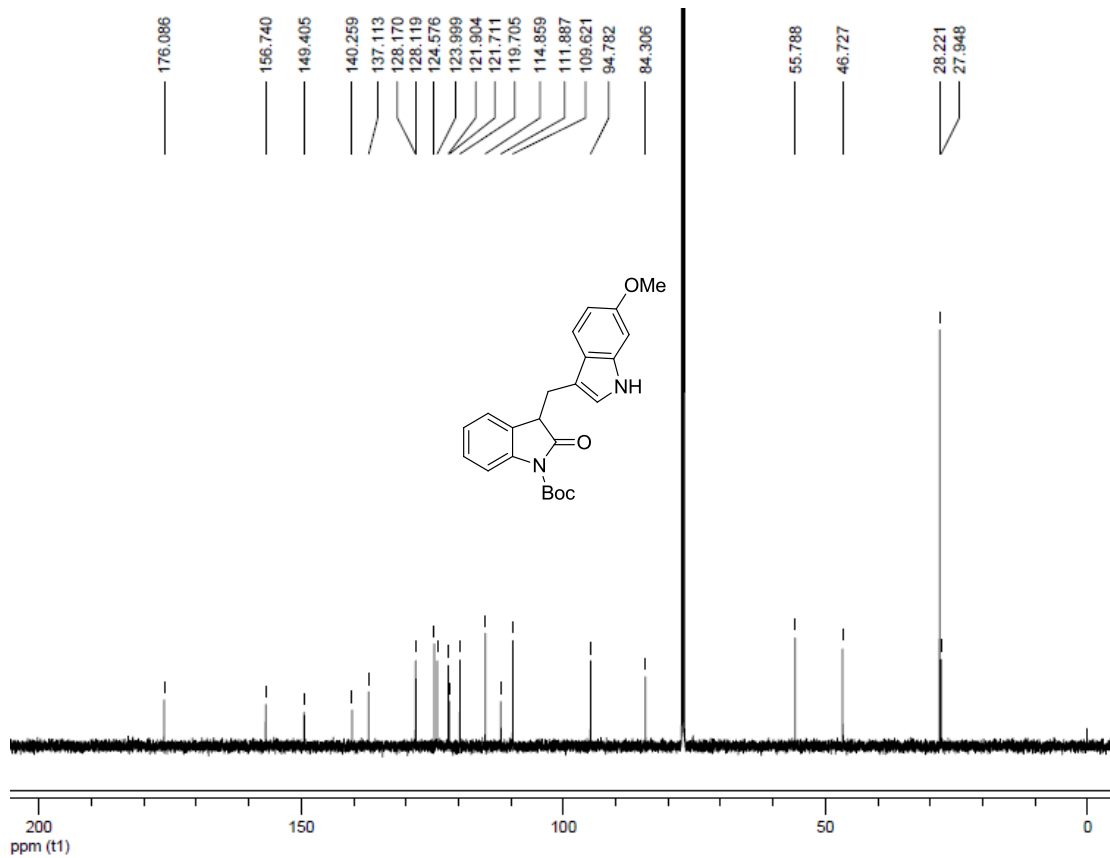

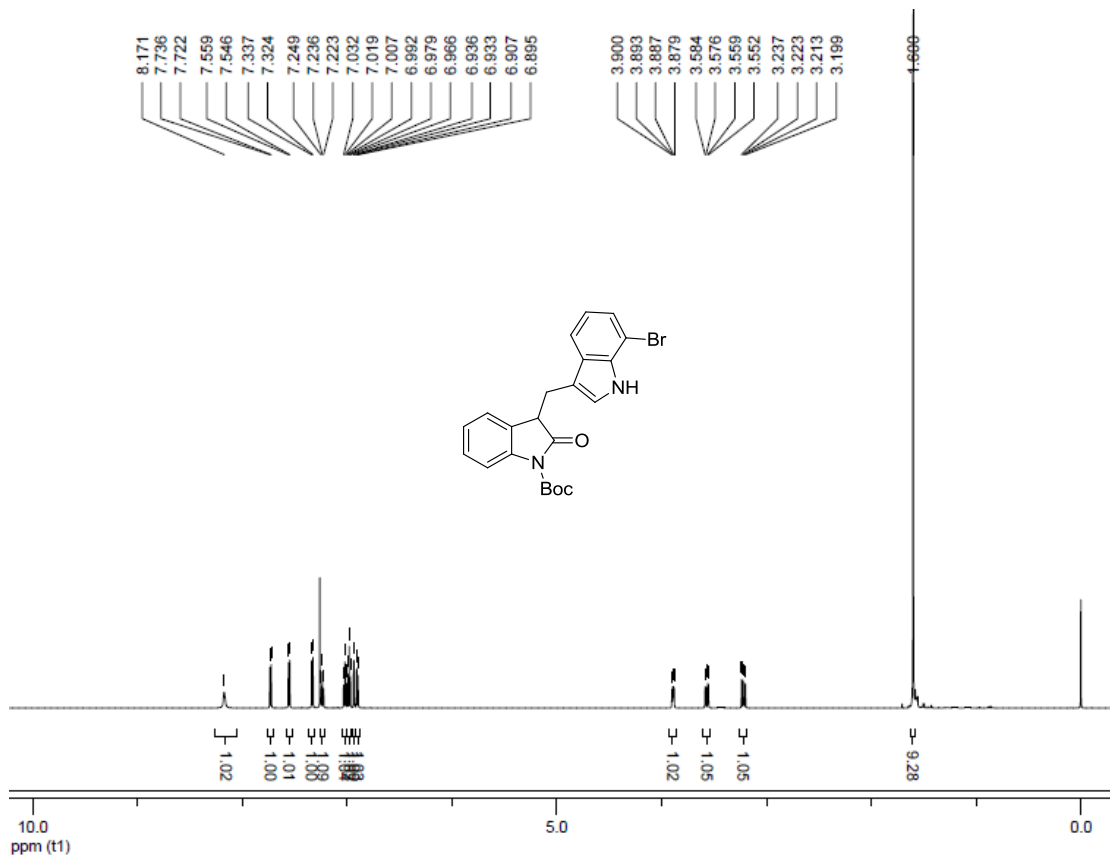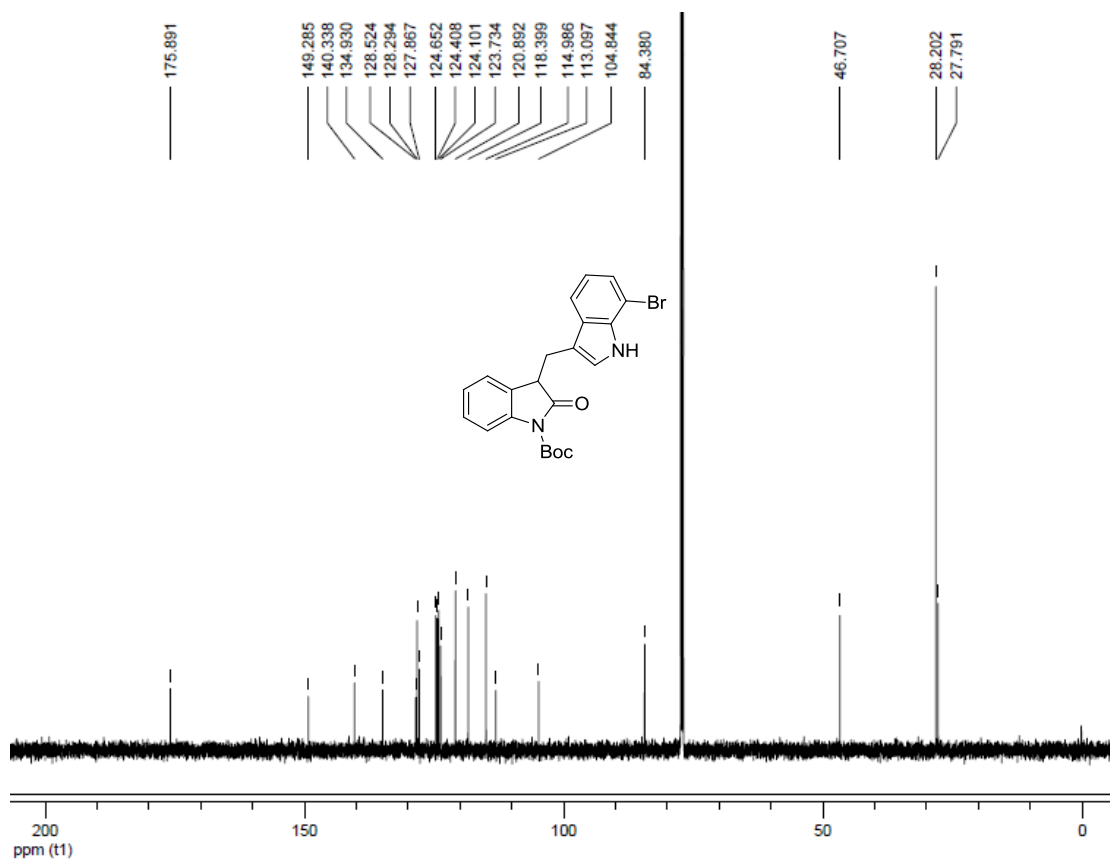

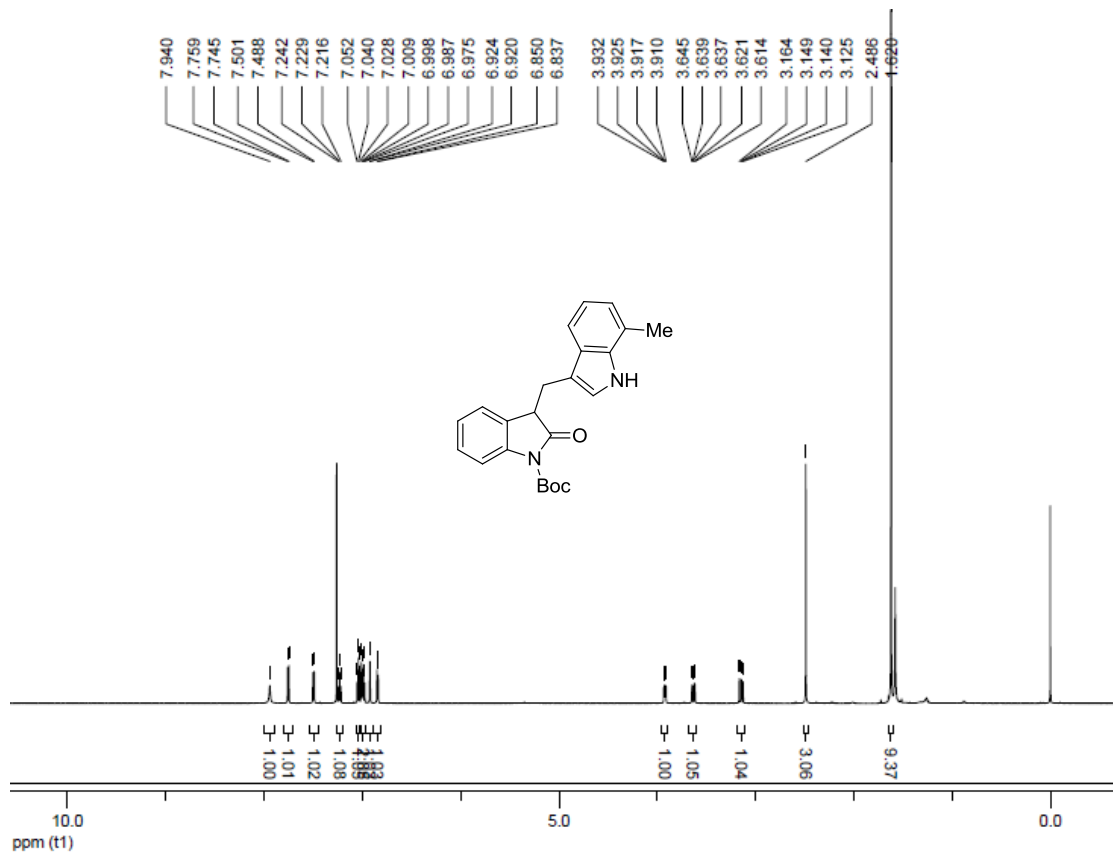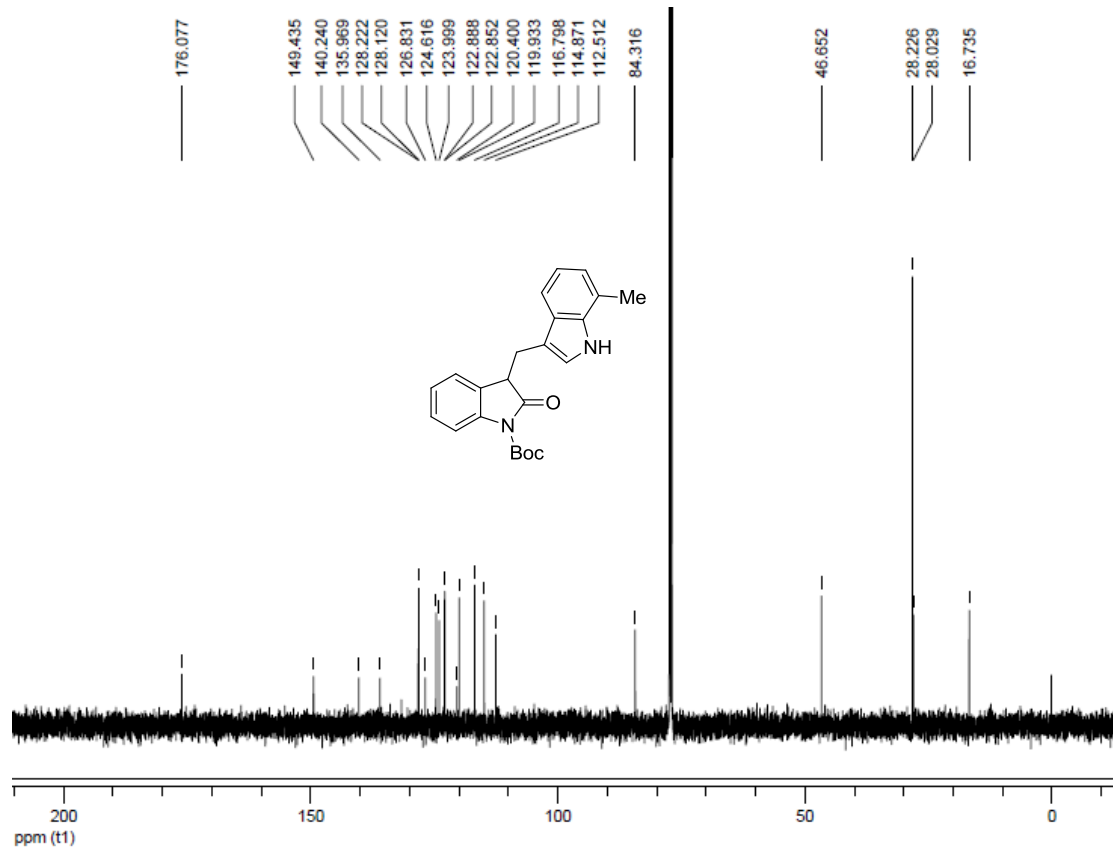



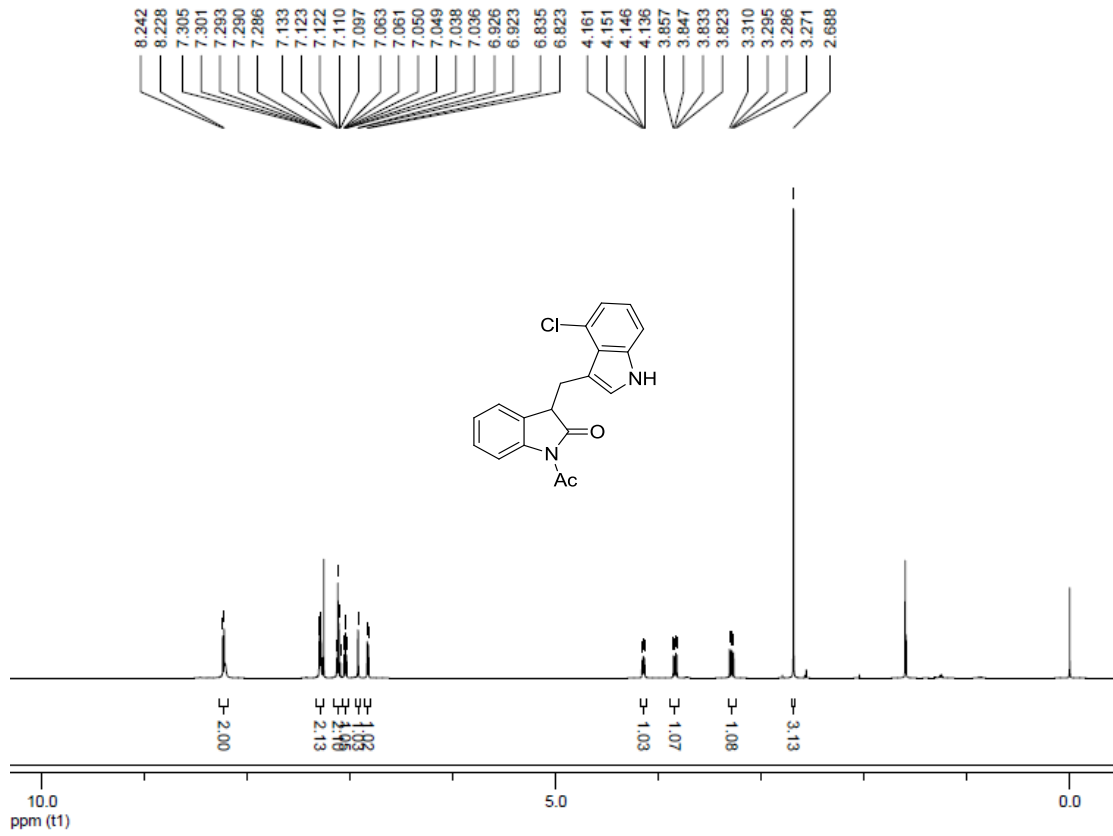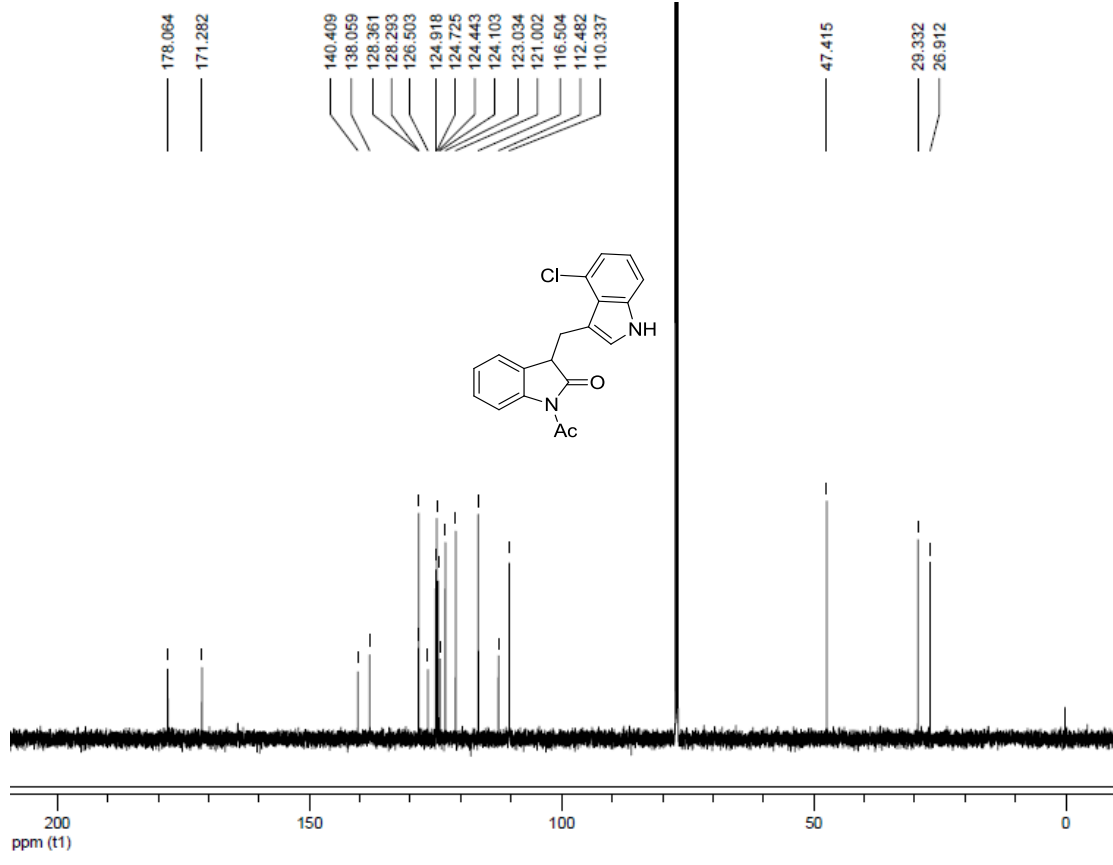

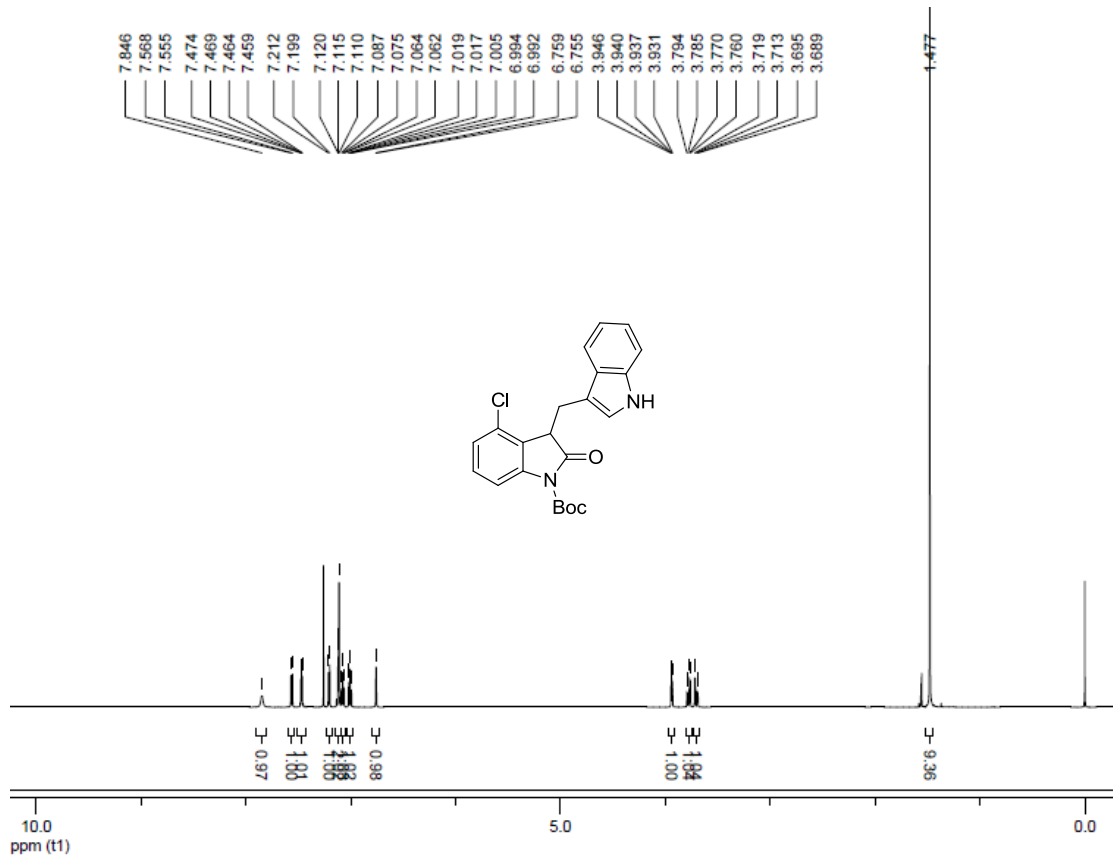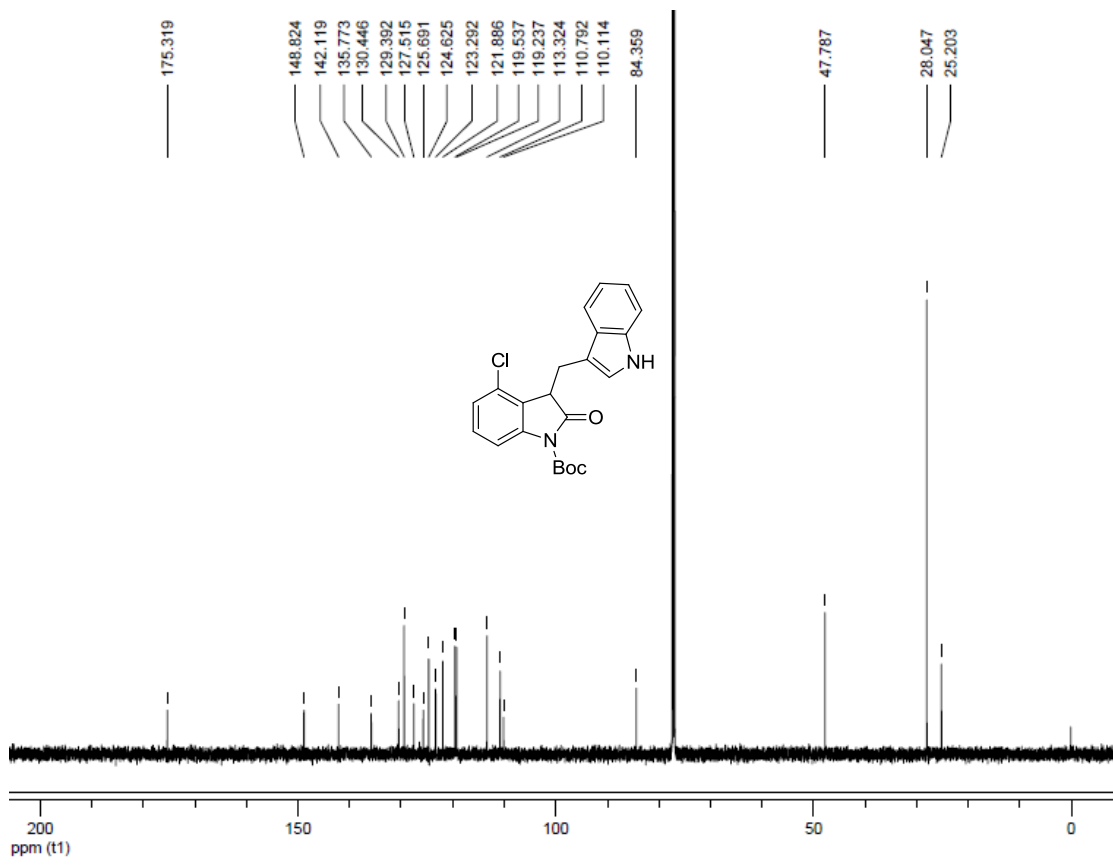



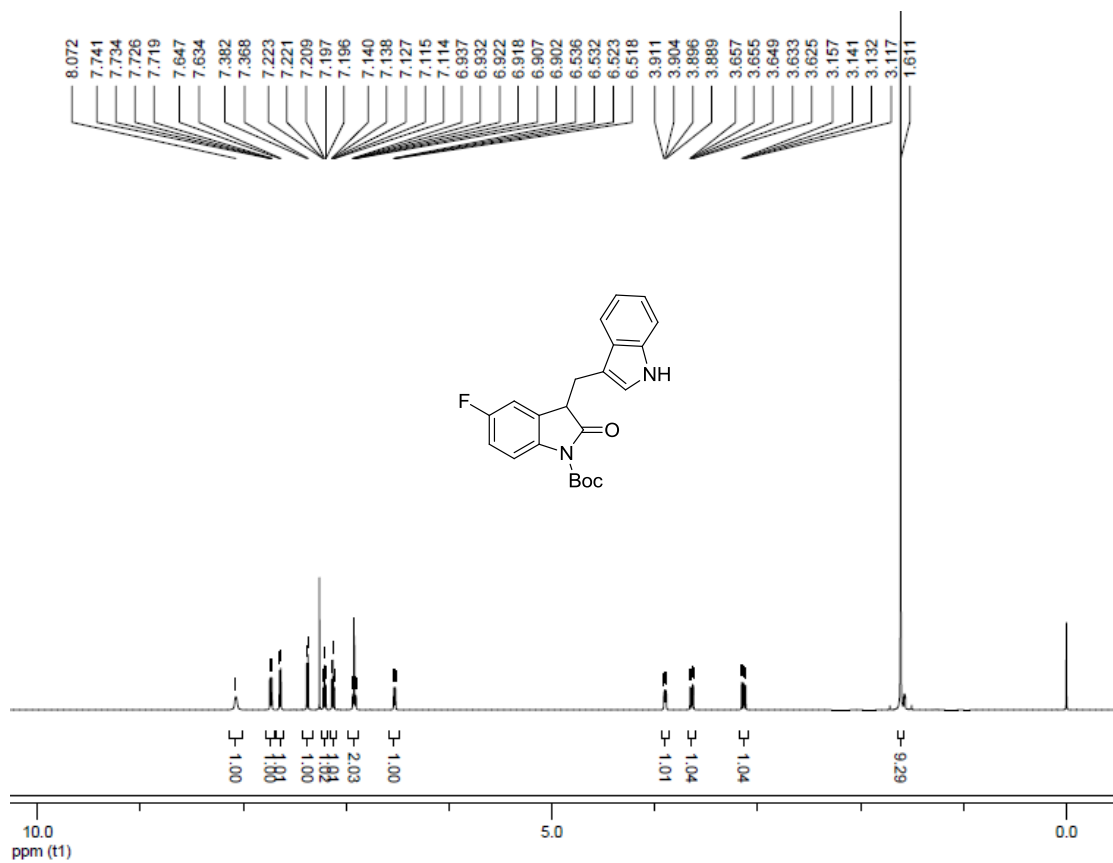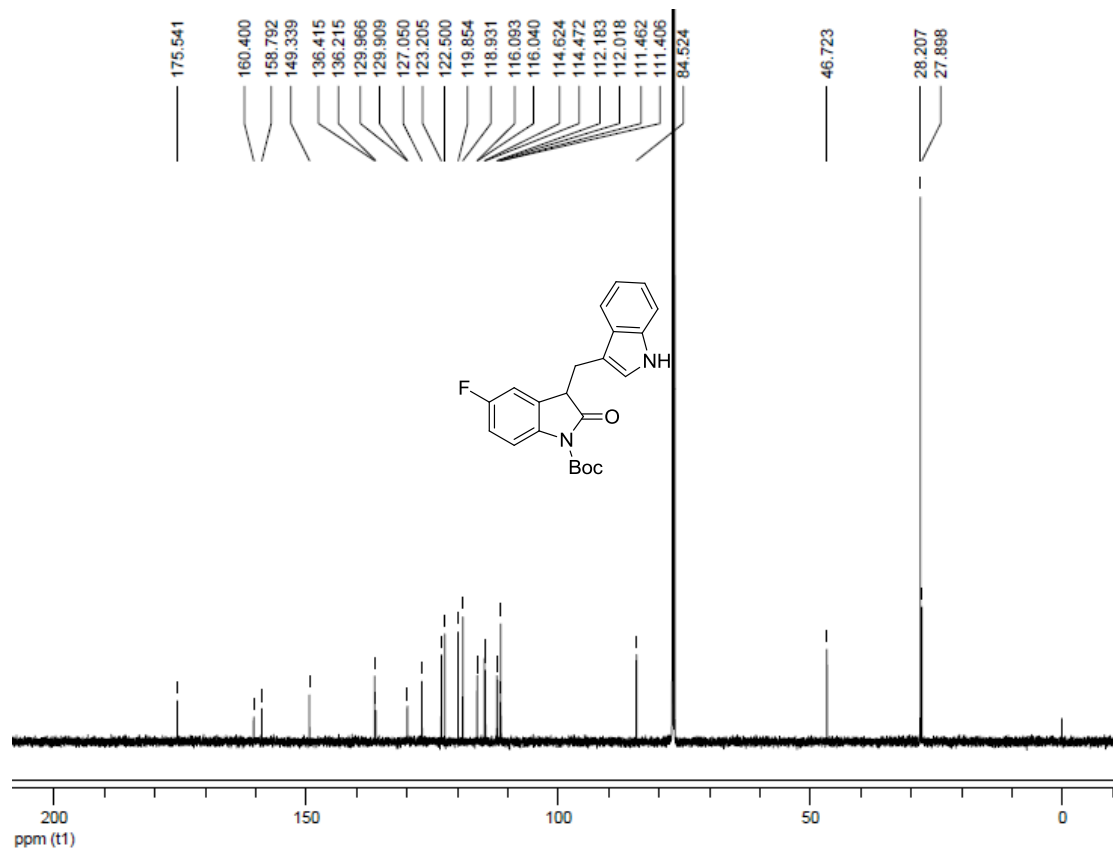

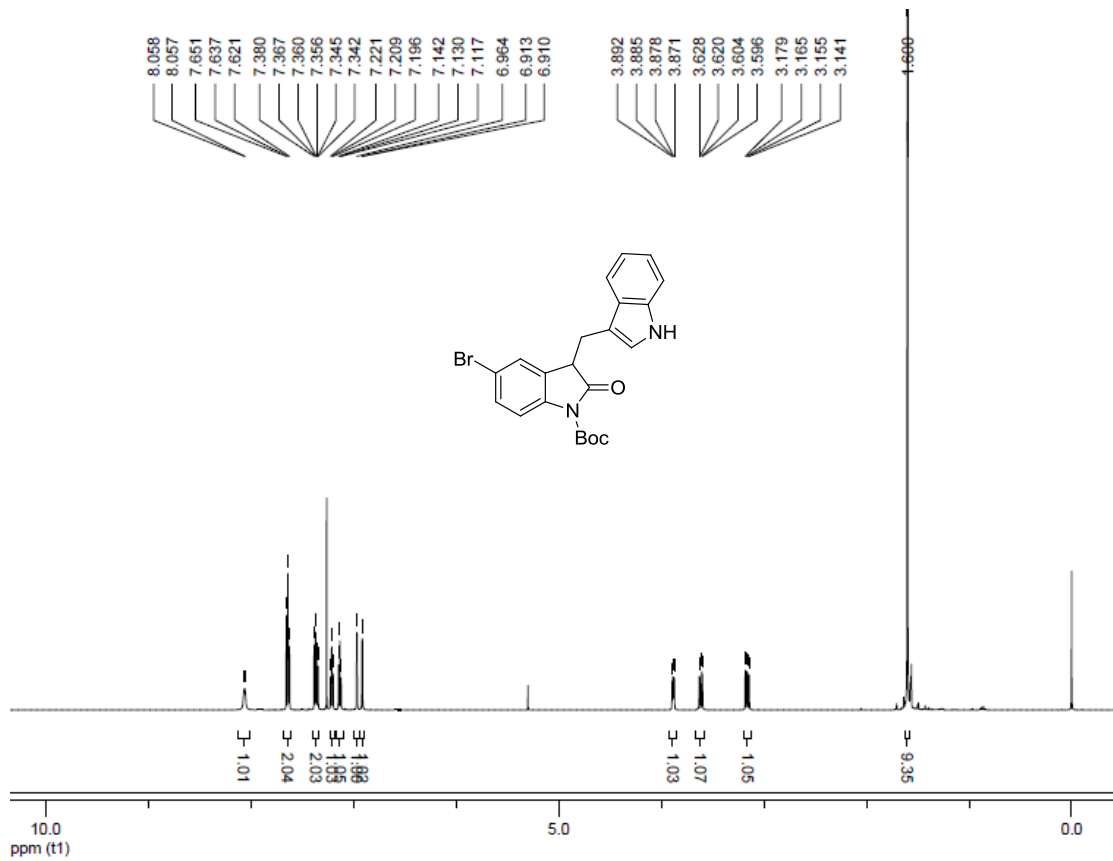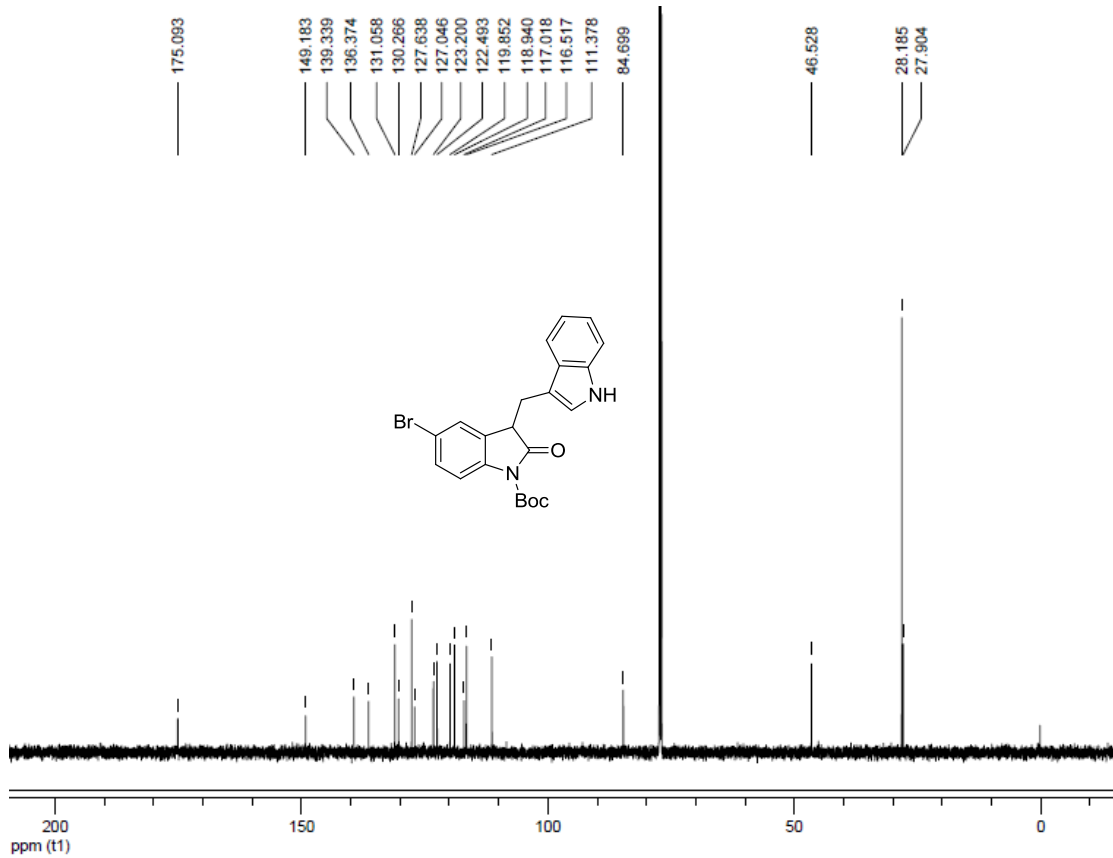

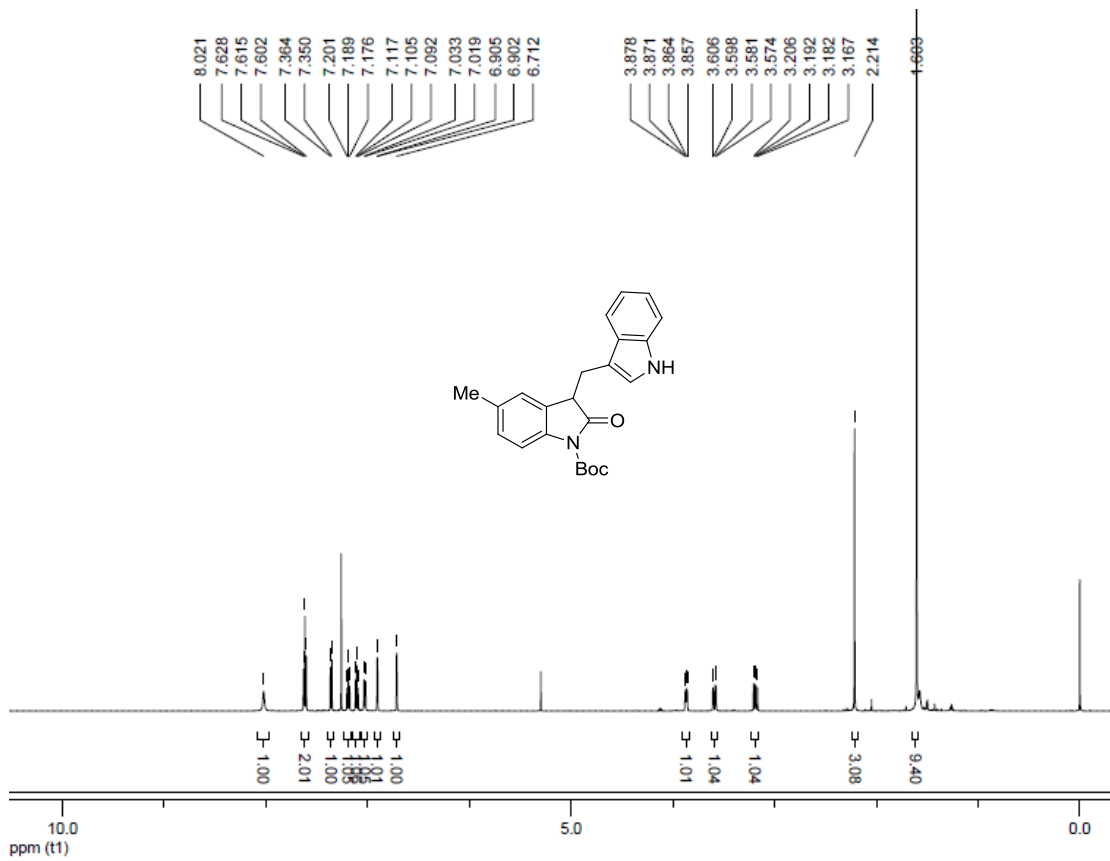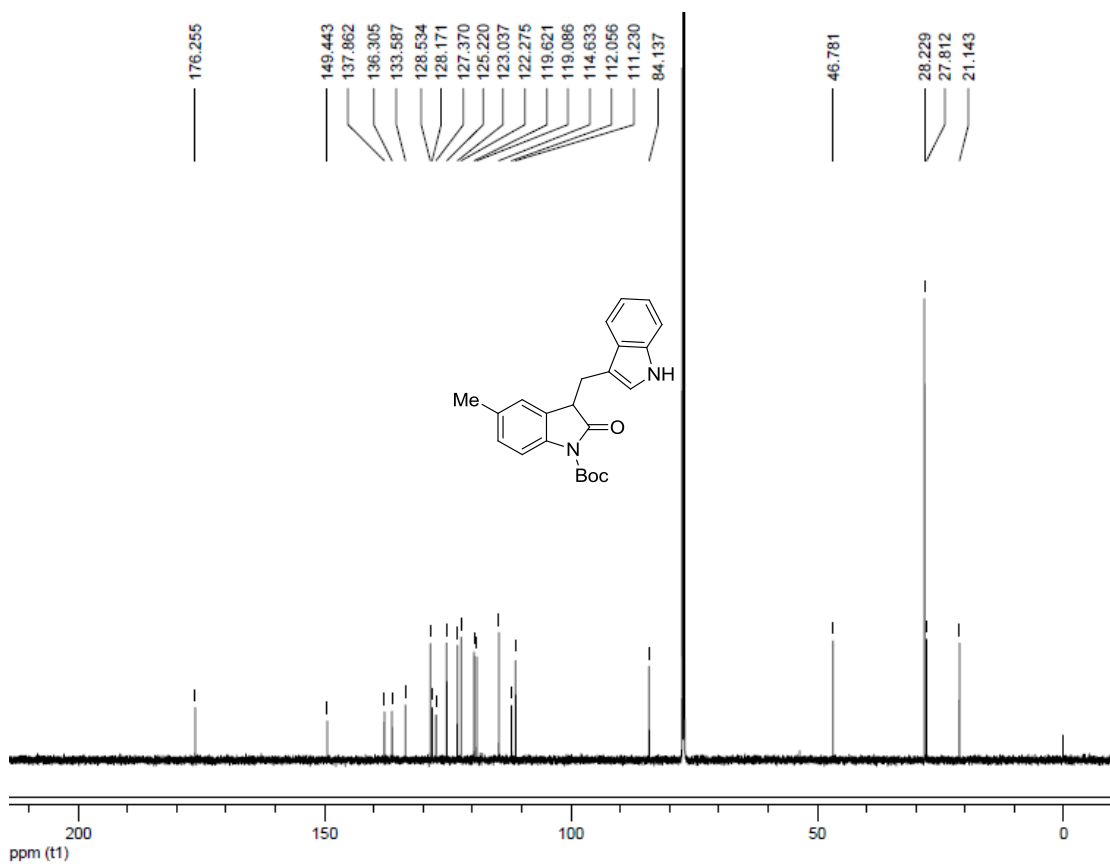

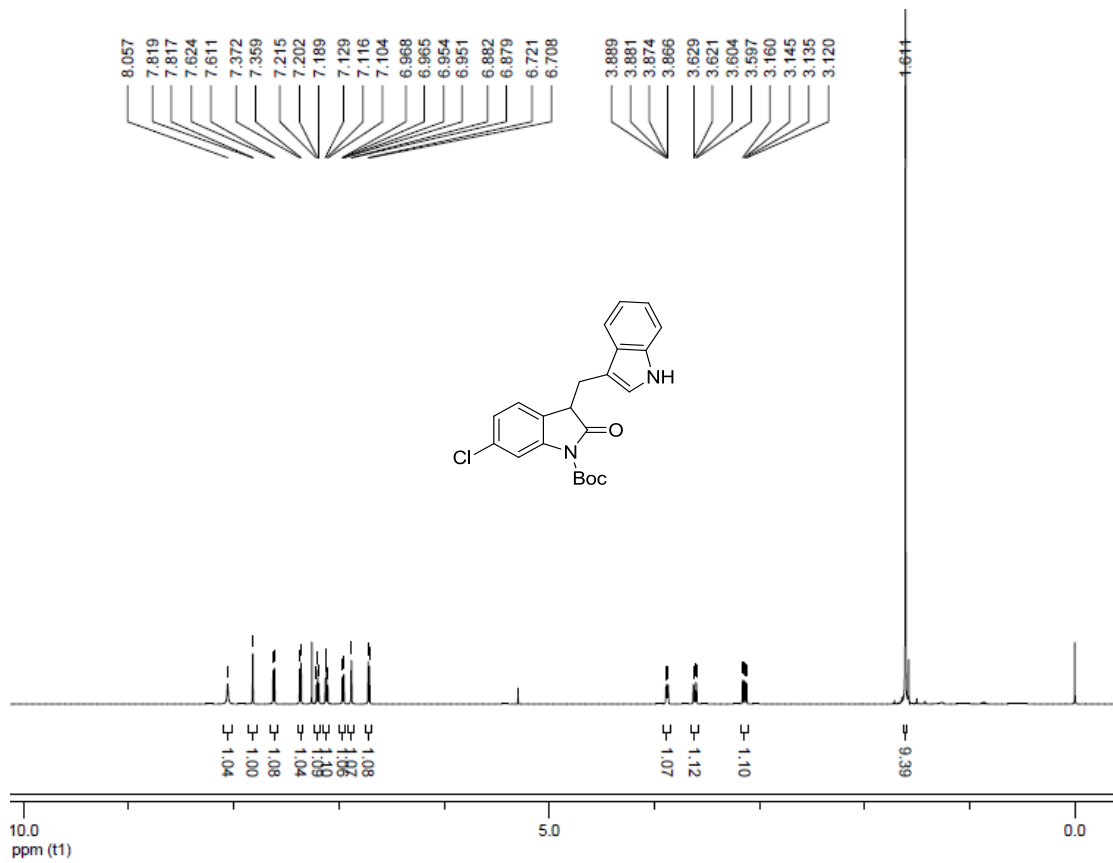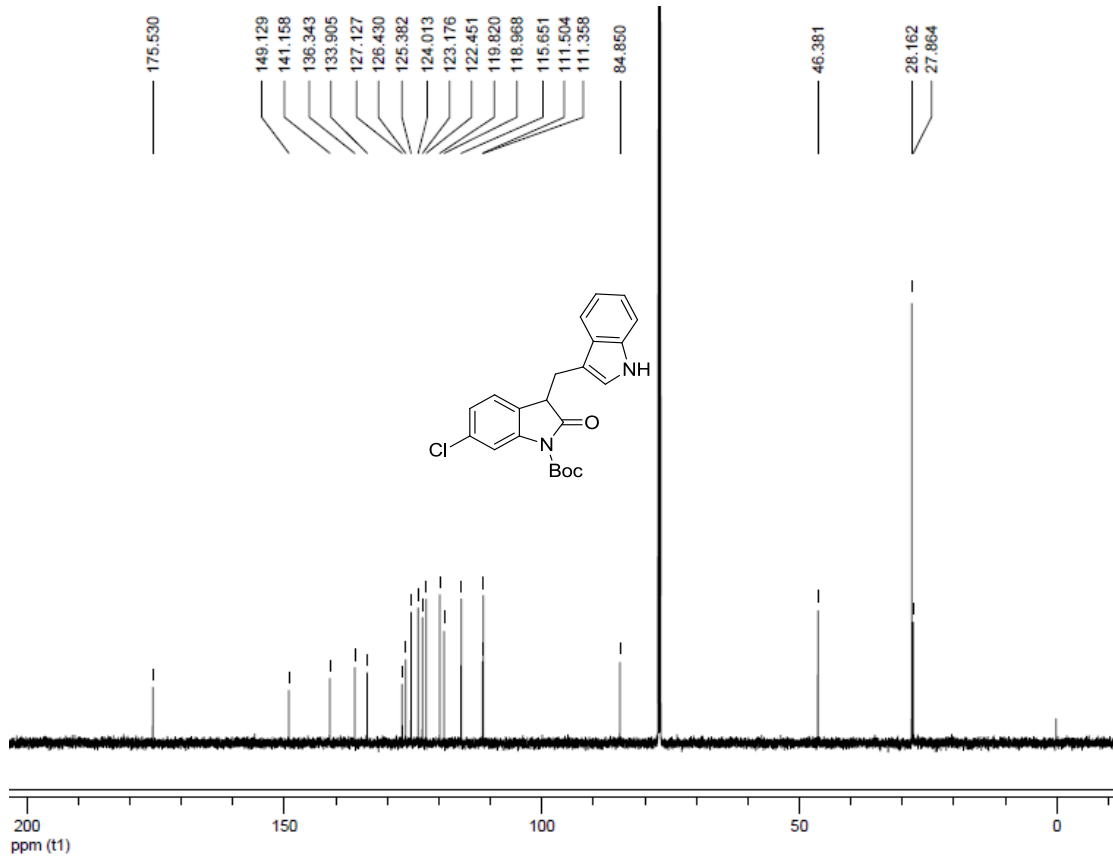

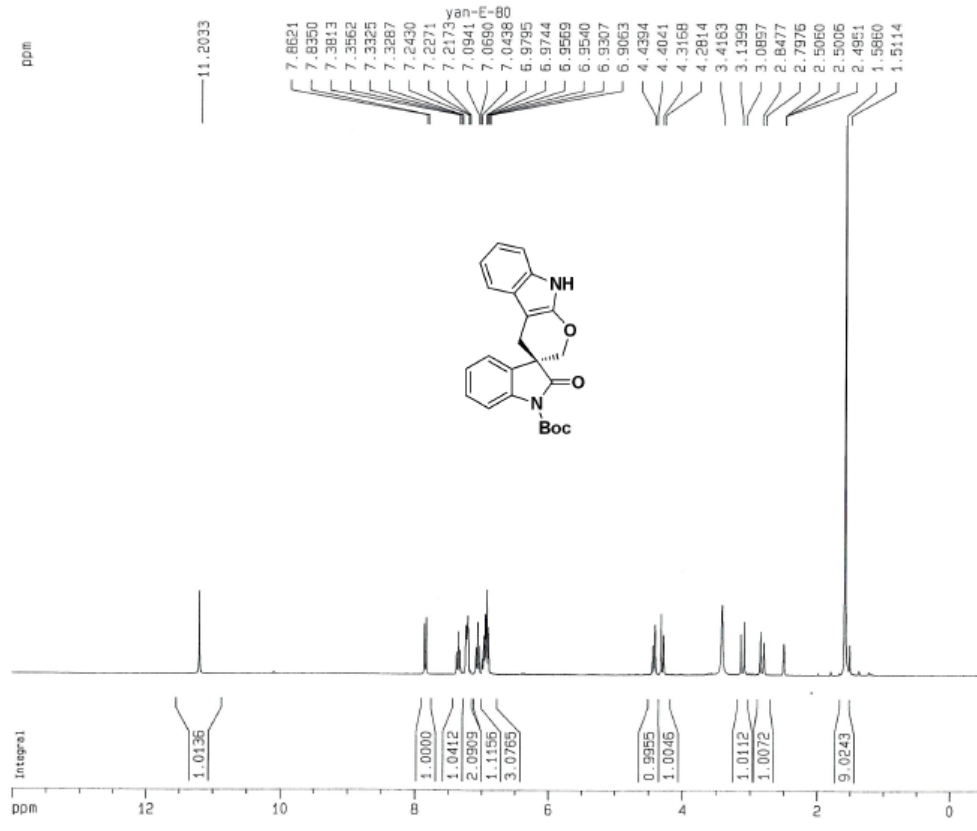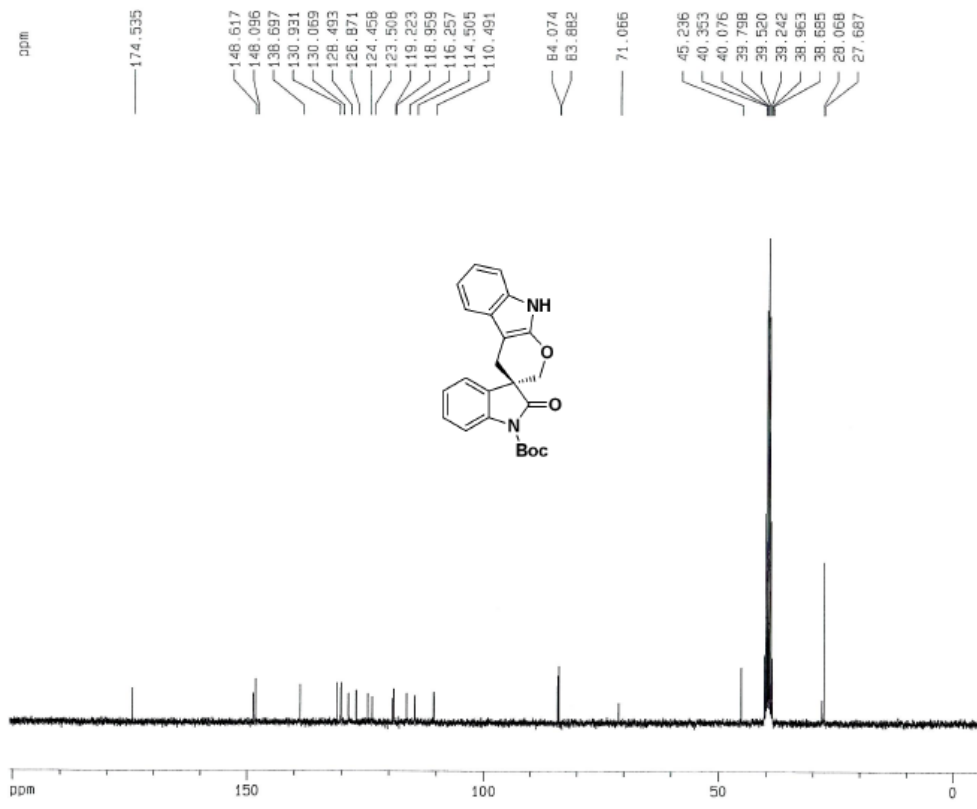

**2a: Racemic**

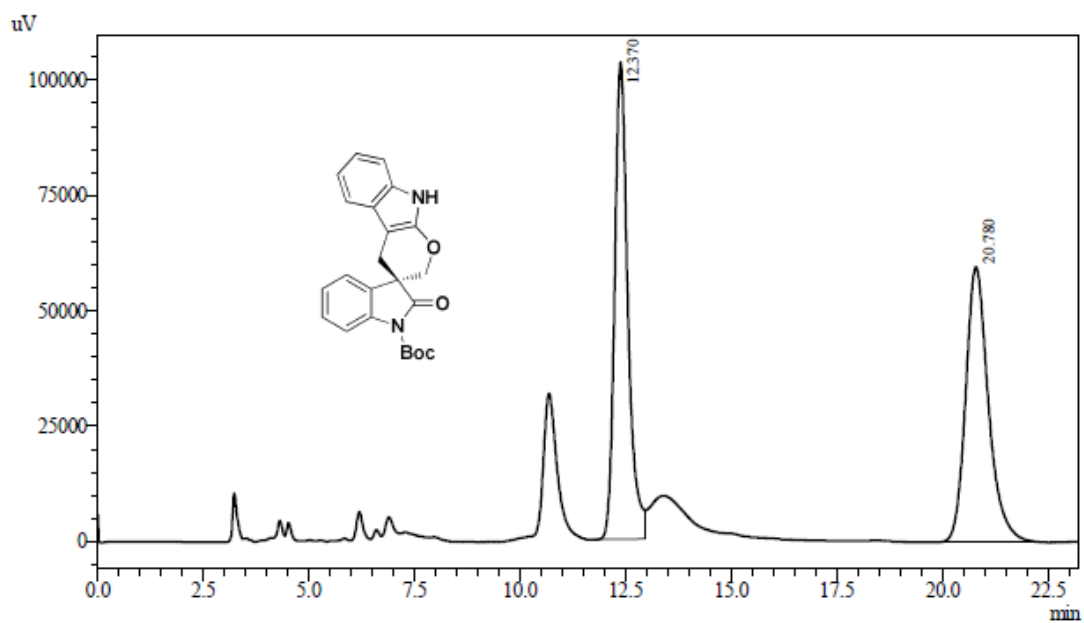

1 Det.A Ch1 / 254nm

Detector A Ch1 254nm

| Peak# | Ret. Time | Area    | Height | Area %  | Height % |
|-------|-----------|---------|--------|---------|----------|
| 1     | 12.370    | 2252472 | 103354 | 50.121  | 63.417   |
| 2     | 20.780    | 2241623 | 59622  | 49.879  | 36.583   |
| Total |           | 4494095 | 162976 | 100.000 | 100.000  |

**2a: Chiral**

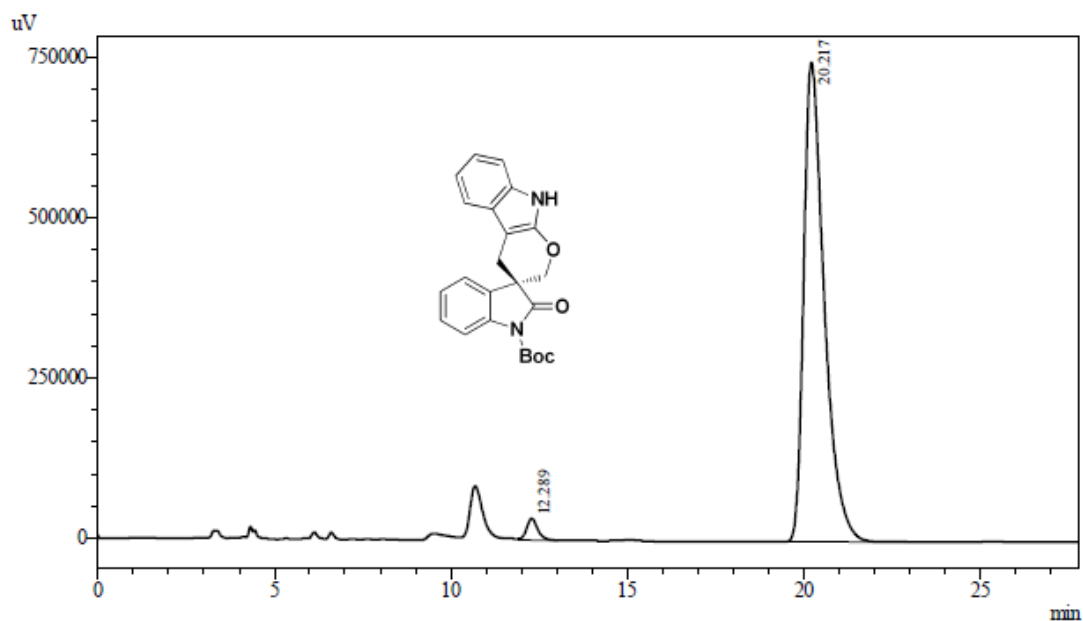

1 Det.A Ch1 / 254nm

Detector A Ch1 254nm

| Peak# | Ret. Time | Area     | Height | Area %  | Height % |
|-------|-----------|----------|--------|---------|----------|
| 1     | 12.289    | 756008   | 33856  | 2.436   | 4.333    |
| 2     | 20.217    | 30274276 | 747487 | 97.564  | 95.667   |
| Total |           | 31030283 | 781343 | 100.000 | 100.000  |

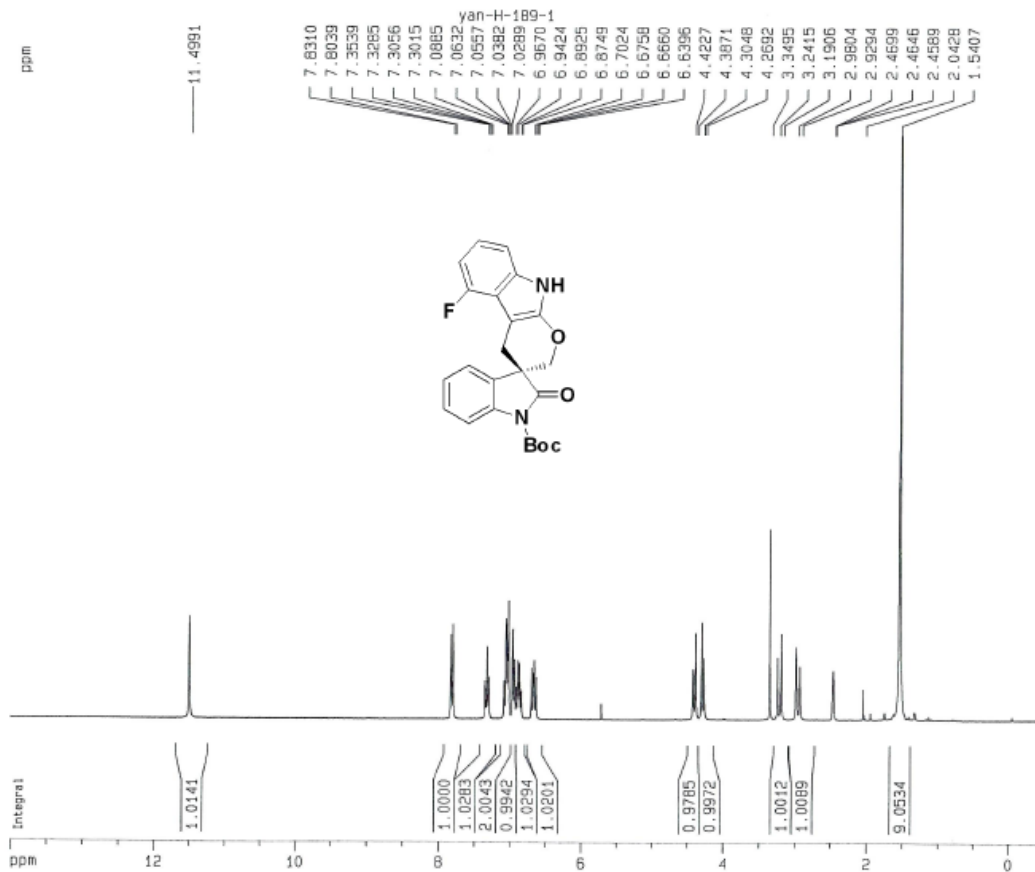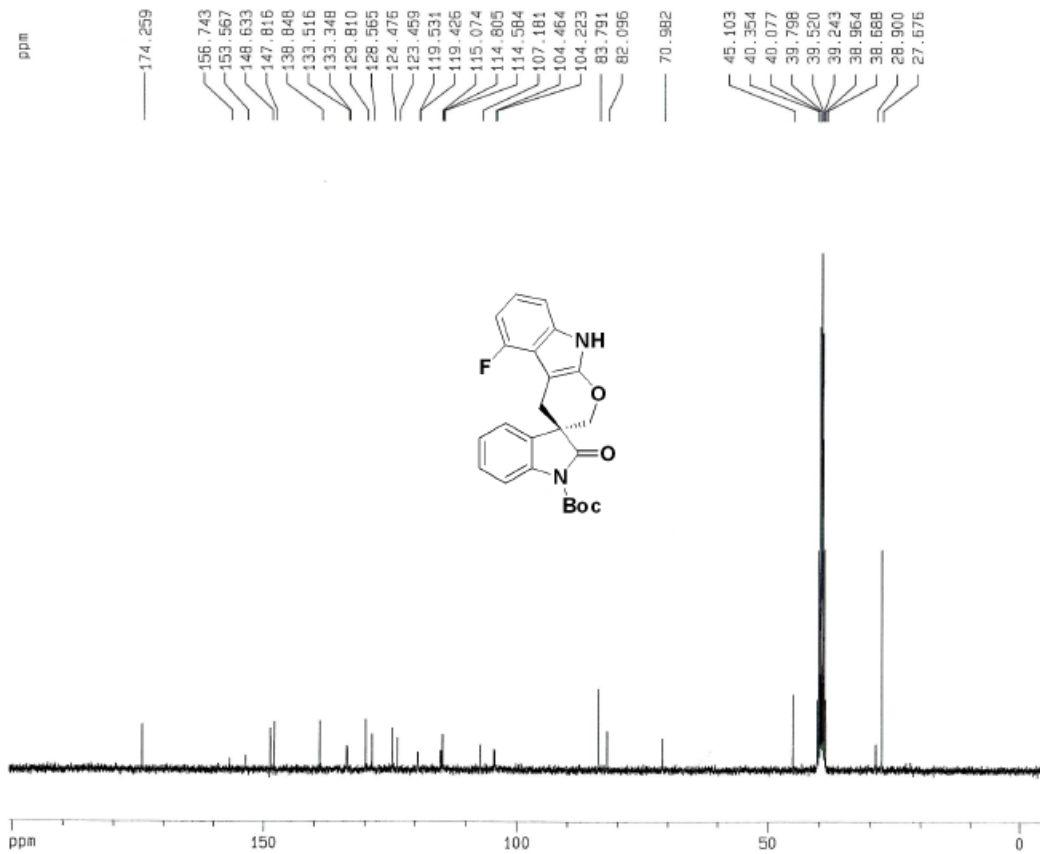

## 2b: Racemic

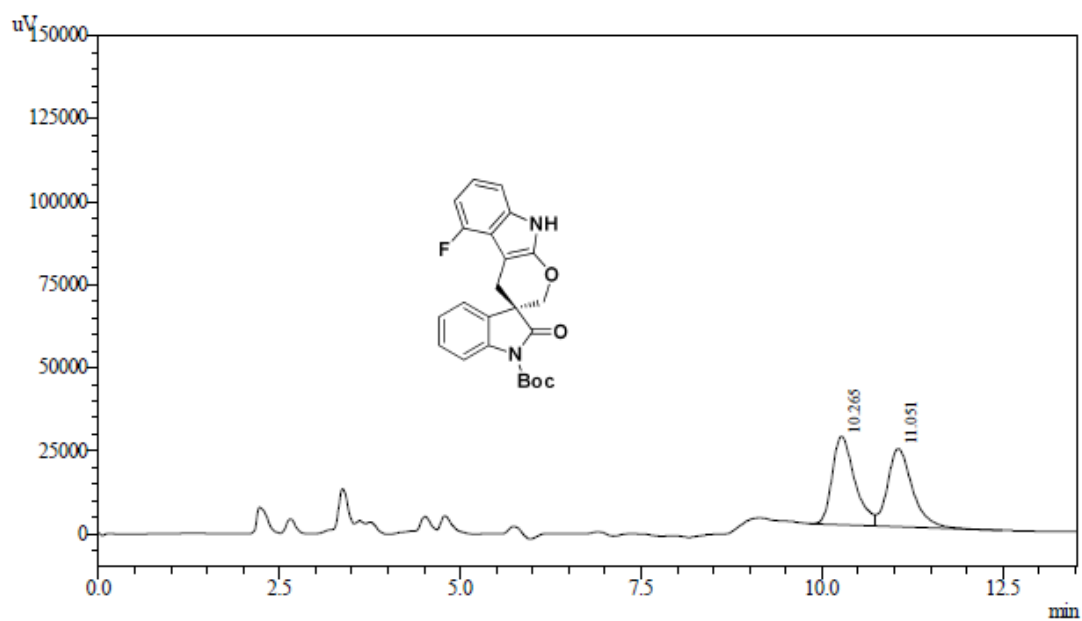

1 Det.A Ch1 / 254nm

Detector A Ch1 254nm

| Peak# | Ret. Time | Area    | Height | Area %  | Height % |
|-------|-----------|---------|--------|---------|----------|
| 1     | 10.265    | 583403  | 26595  | 50.837  | 53.084   |
| 2     | 11.051    | 564185  | 23505  | 49.163  | 46.916   |
| Total |           | 1147588 | 50100  | 100.000 | 100.000  |

## 2b: Chiral

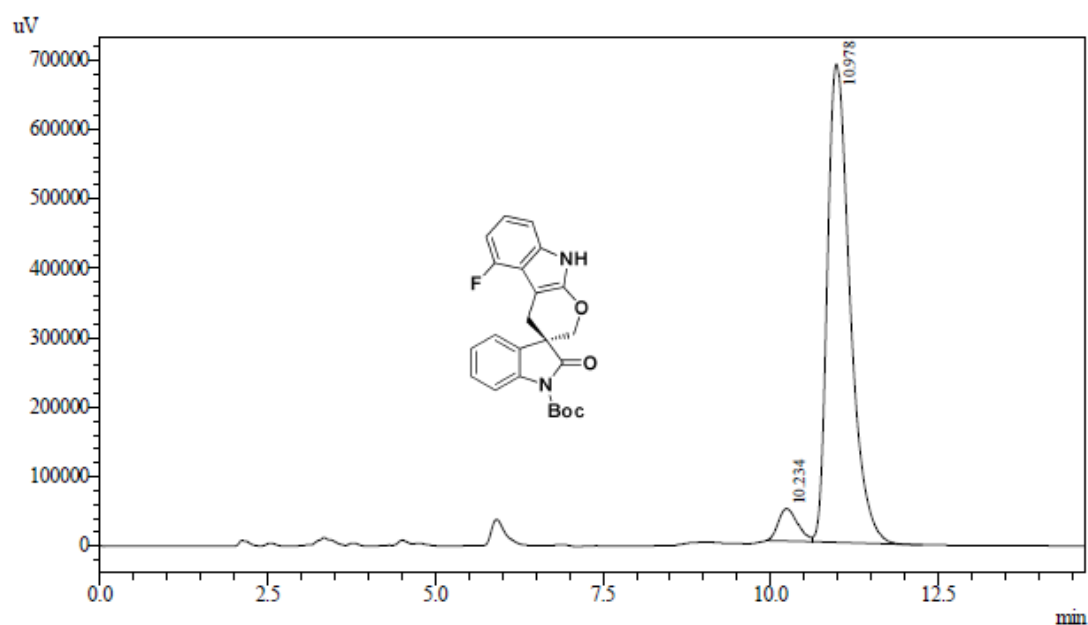

1 Det.A Ch1 / 254nm

Detector A Ch1 254nm

| Peak# | Ret. Time | Area     | Height | Area %  | Height % |
|-------|-----------|----------|--------|---------|----------|
| 1     | 10.234    | 943058   | 46744  | 5.549   | 6.352    |
| 2     | 10.978    | 16052791 | 689142 | 94.451  | 93.648   |
| Total |           | 16995849 | 735887 | 100.000 | 100.000  |



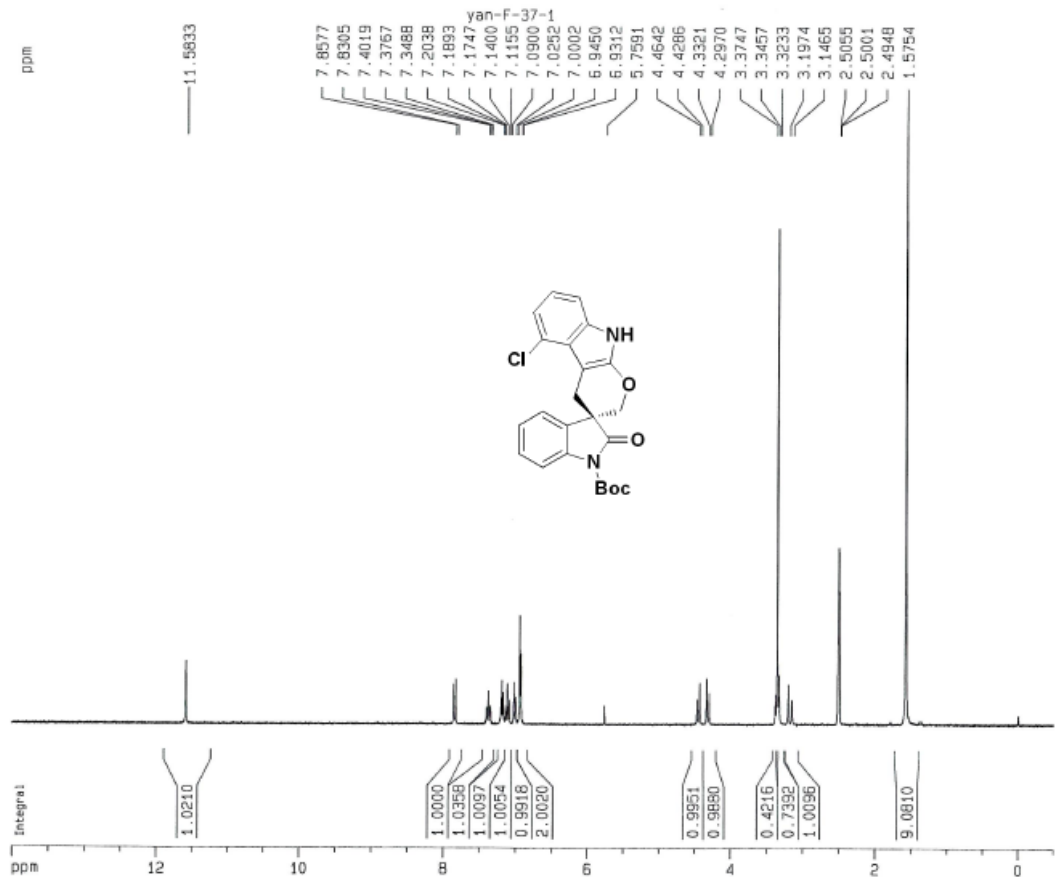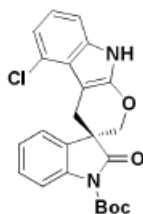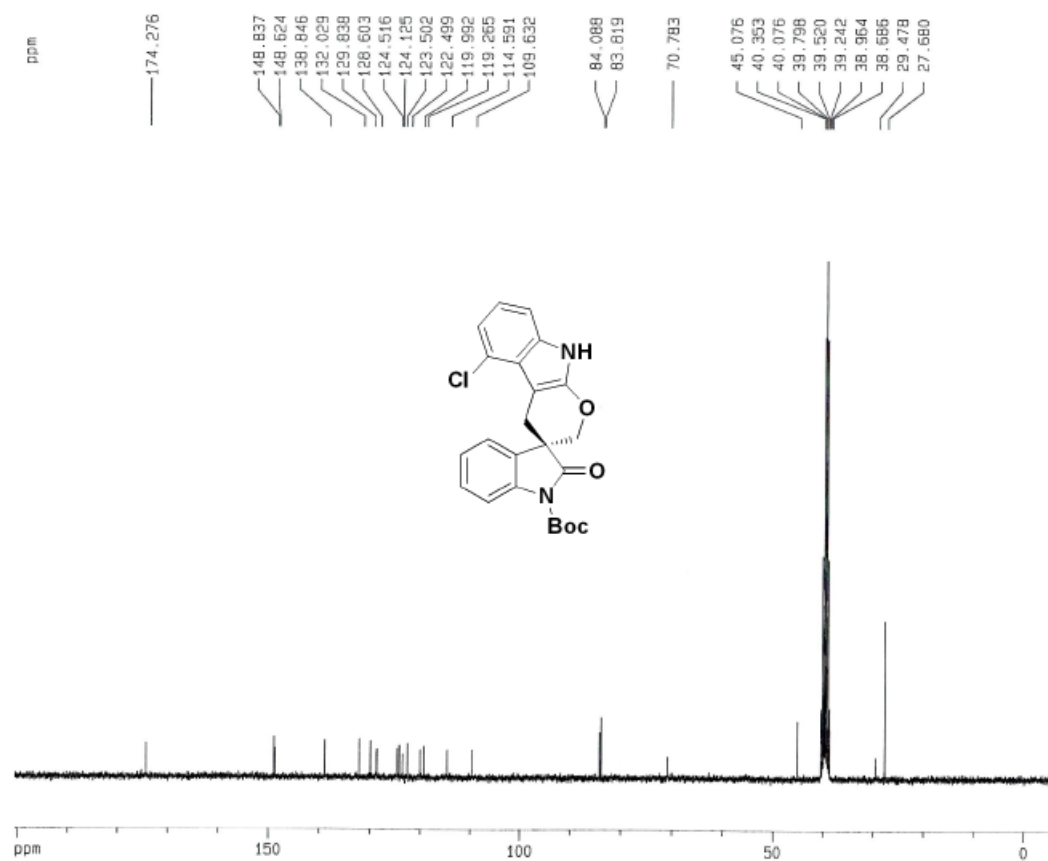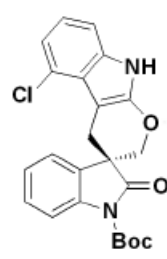

## 2c: Racemic

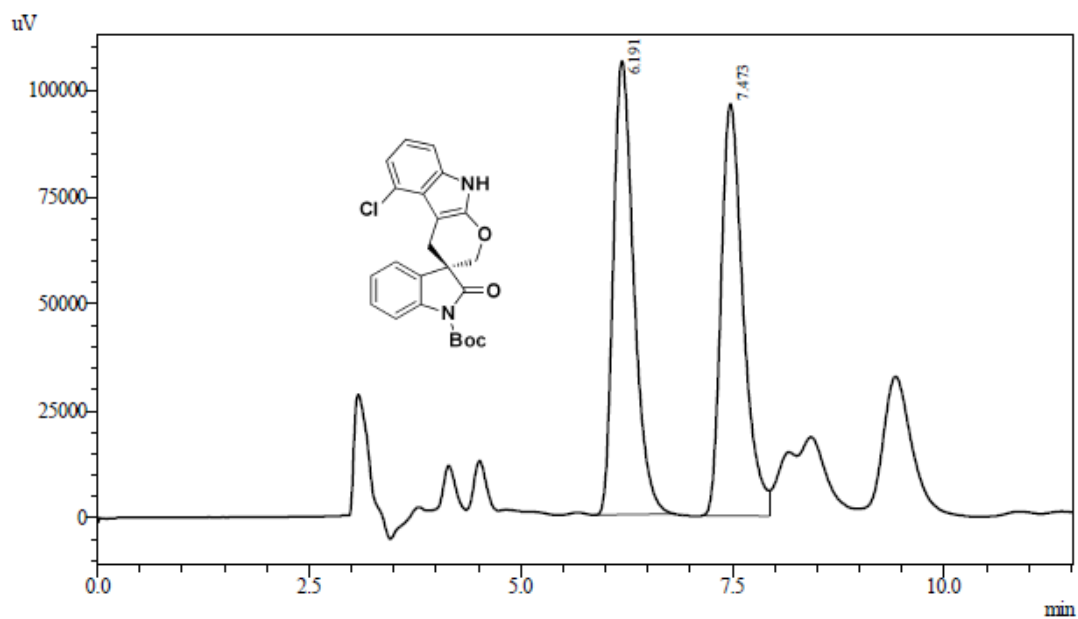

Detector A Ch1 254nm

| Peak# | Ret. Time | Area    | Height | Area %  | Height % |
|-------|-----------|---------|--------|---------|----------|
| 1     | 6.191     | 1793175 | 106138 | 50.571  | 52.430   |
| 2     | 7.473     | 1752707 | 96300  | 49.429  | 47.570   |
| Total |           | 3545882 | 202438 | 100.000 | 100.000  |

## 2c: Chiral

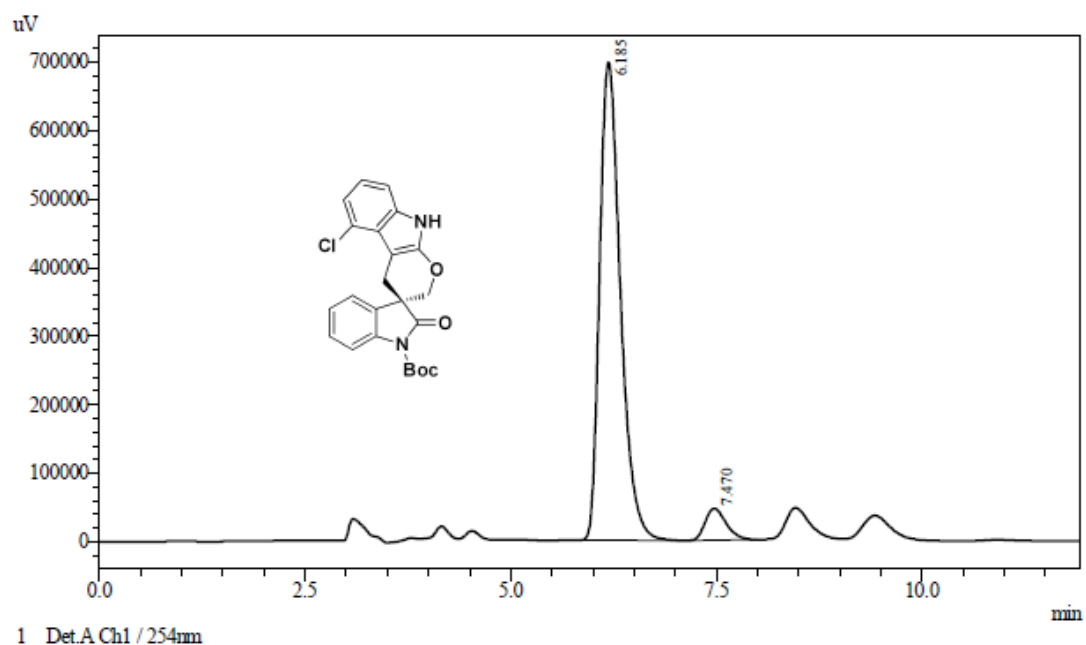

Detector A Ch1 254nm

| Peak# | Ret. Time | Area     | Height | Area %  | Height % |
|-------|-----------|----------|--------|---------|----------|
| 1     | 6.185     | 12272943 | 697819 | 93.683  | 93.767   |
| 2     | 7.470     | 827618   | 46389  | 6.317   | 6.233    |
| Total |           | 13100561 | 744208 | 100.000 | 100.000  |

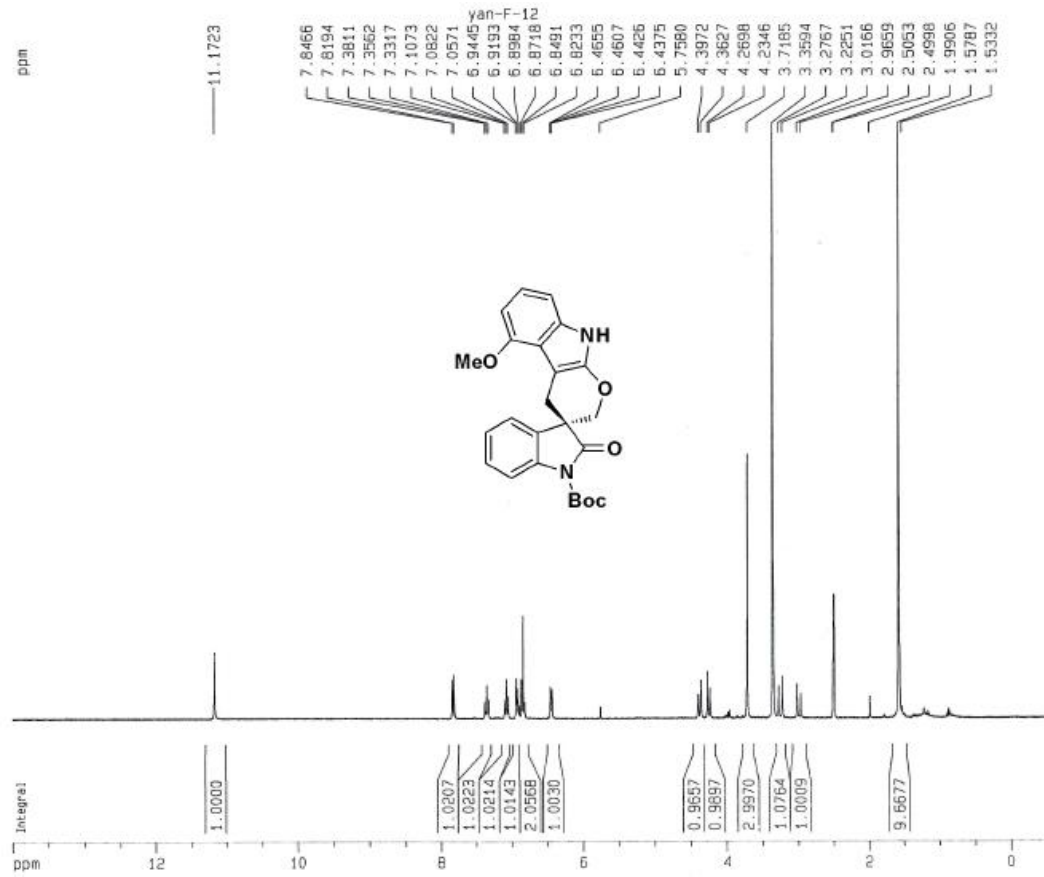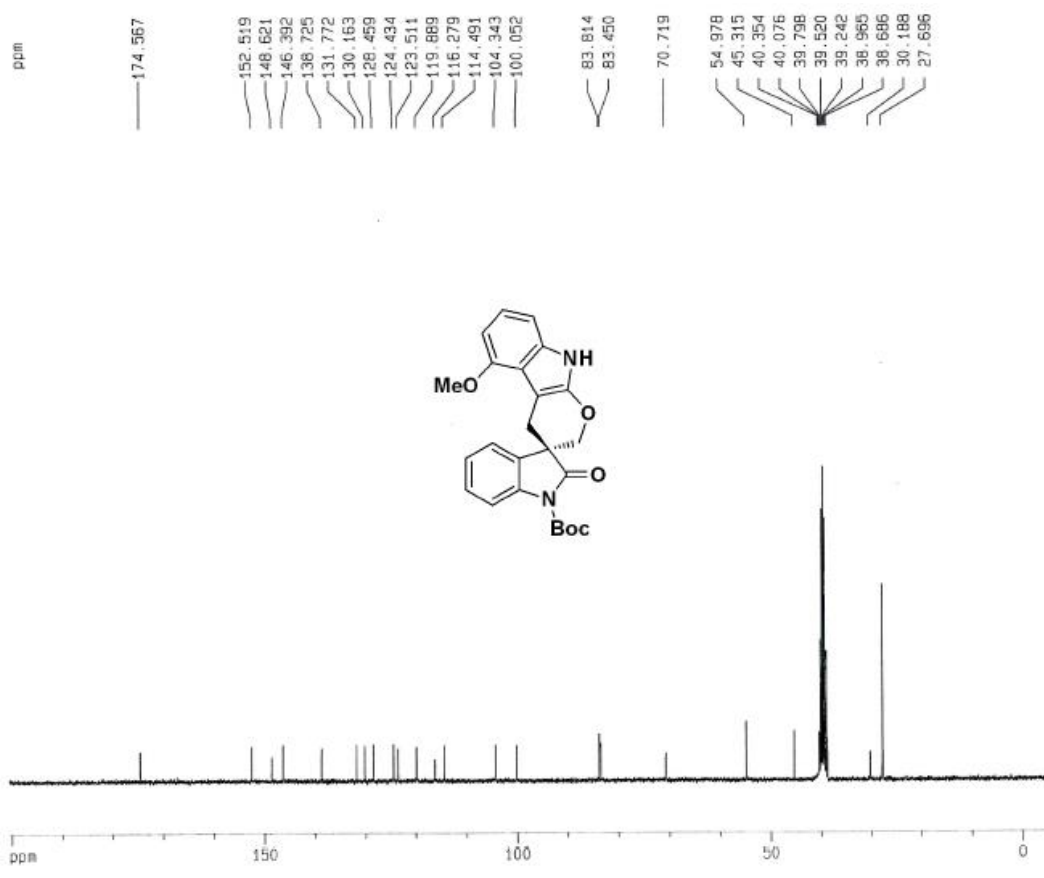

**2d: Racemic**

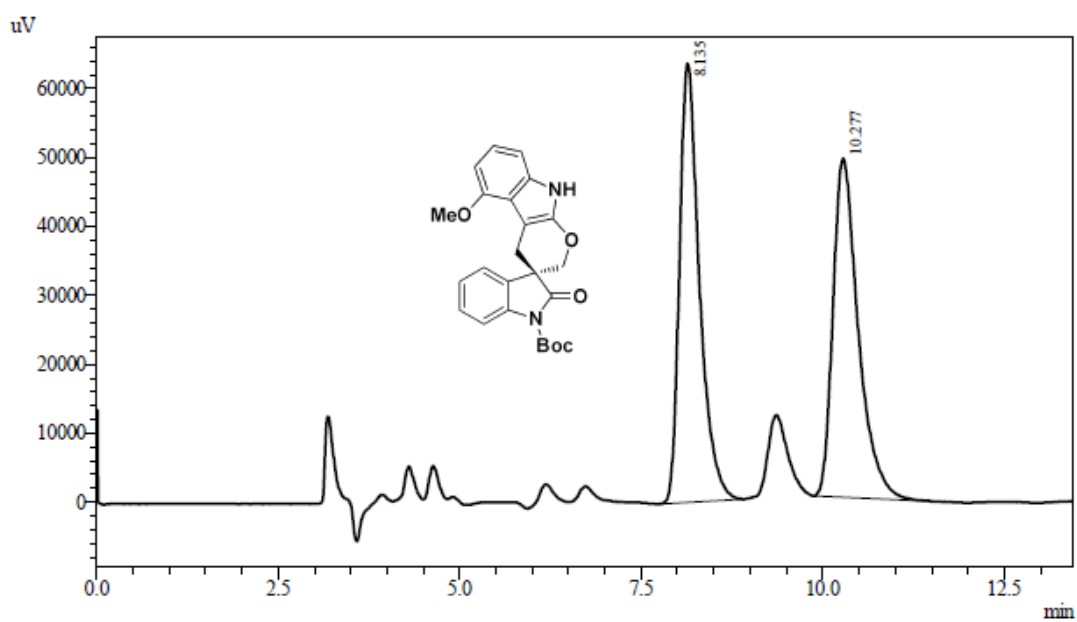

1 Det.A Ch1 / 254nm

Detector A Ch1 254nm

| Peak# | Ret. Time | Area    | Height | Area %  | Height % |
|-------|-----------|---------|--------|---------|----------|
| 1     | 8.135     | 1216168 | 63640  | 50.575  | 56.447   |
| 2     | 10.277    | 1188520 | 49103  | 49.425  | 43.553   |
| Total |           | 2404688 | 112743 | 100.000 | 100.000  |

**2d: Chiral**

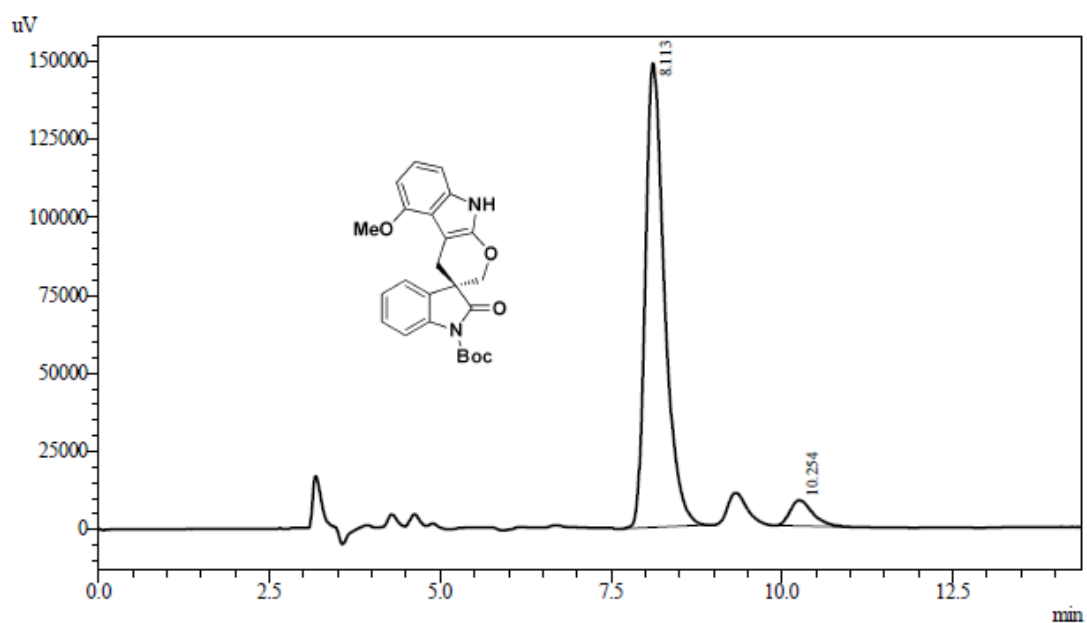

1 Det.A Ch1 / 254nm

Detector A Ch1 254nm

| Peak# | Ret. Time | Area    | Height | Area %  | Height % |
|-------|-----------|---------|--------|---------|----------|
| 1     | 8.113     | 2901862 | 148628 | 93.877  | 94.770   |
| 2     | 10.254    | 189283  | 8202   | 6.123   | 5.230    |
| Total |           | 3091145 | 156830 | 100.000 | 100.000  |

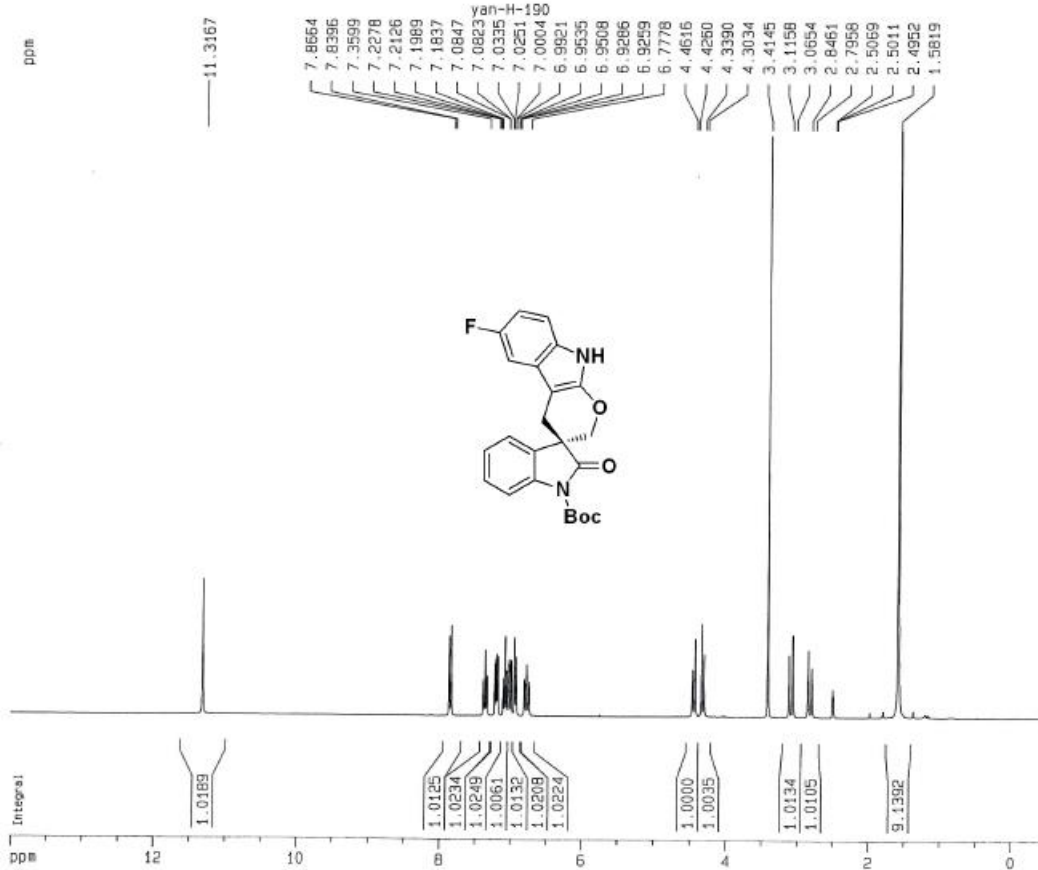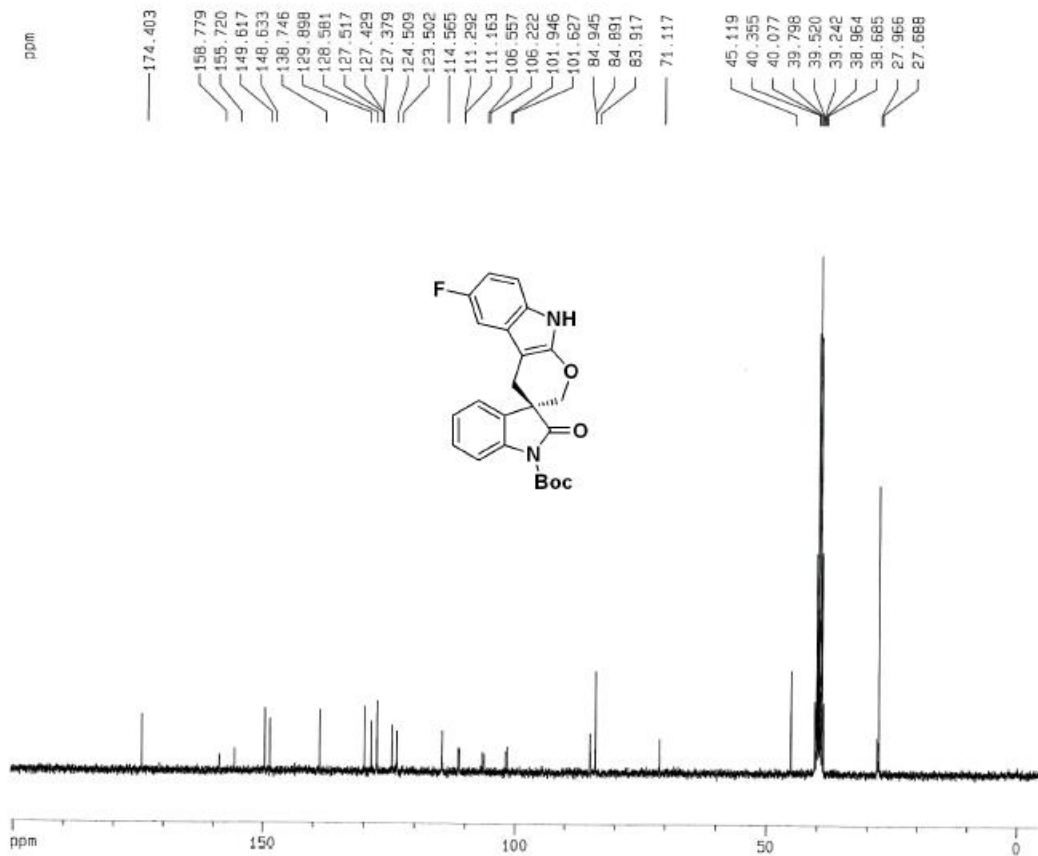

## 2e: Racemic

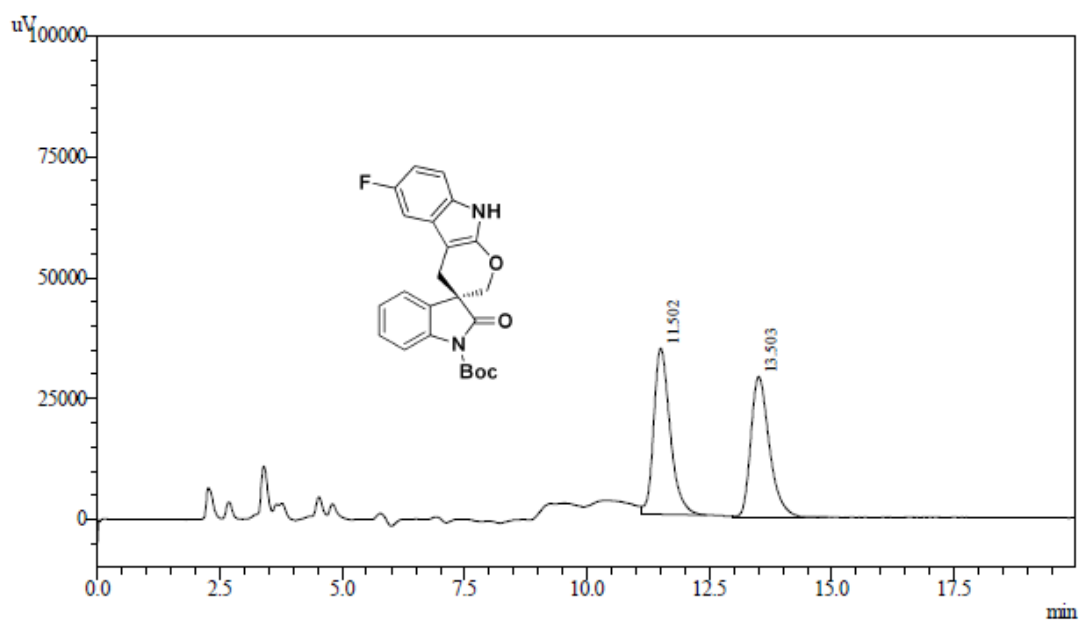

1 Det.A Ch1 /254nm

Detector A Ch1 254nm

| Peak# | Ret. Time | Area    | Height | Area %  | Height % |
|-------|-----------|---------|--------|---------|----------|
| 1     | 11.502    | 801927  | 34285  | 50.871  | 54.073   |
| 2     | 13.503    | 774458  | 29121  | 49.129  | 45.927   |
| Total |           | 1576385 | 63406  | 100.000 | 100.000  |

## 2e: Chiral

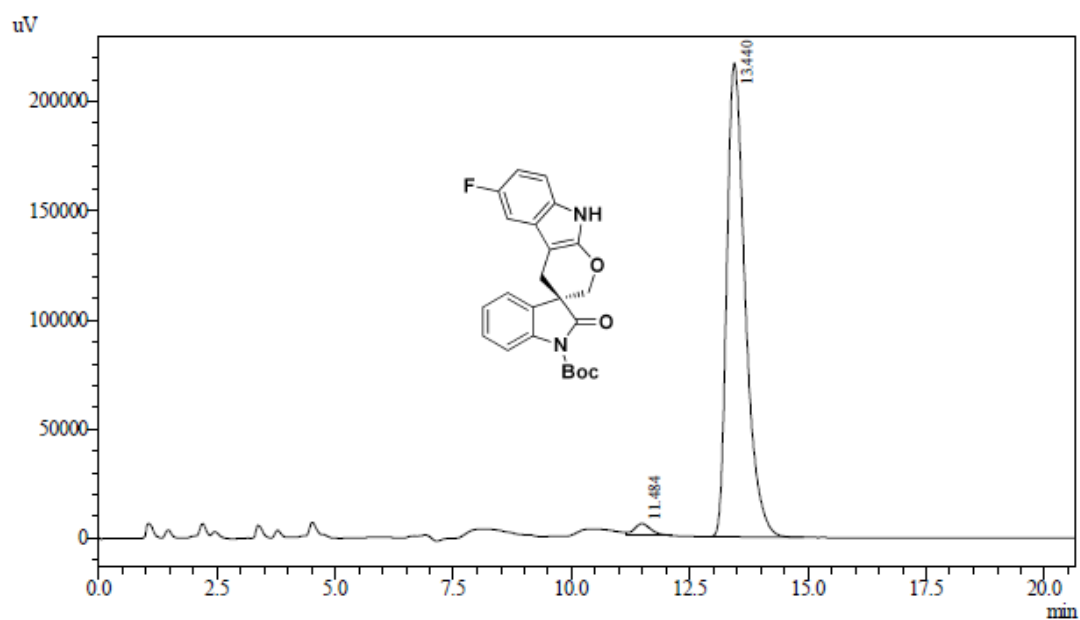

1 Det.A Ch1 /254nm

Detector A Ch1 254nm

| Peak# | Ret. Time | Area    | Height | Area %  | Height % |
|-------|-----------|---------|--------|---------|----------|
| 1     | 11.484    | 138159  | 5474   | 2.299   | 2.460    |
| 2     | 13.440    | 5870080 | 217000 | 97.701  | 97.540   |
| Total |           | 6008239 | 222474 | 100.000 | 100.000  |

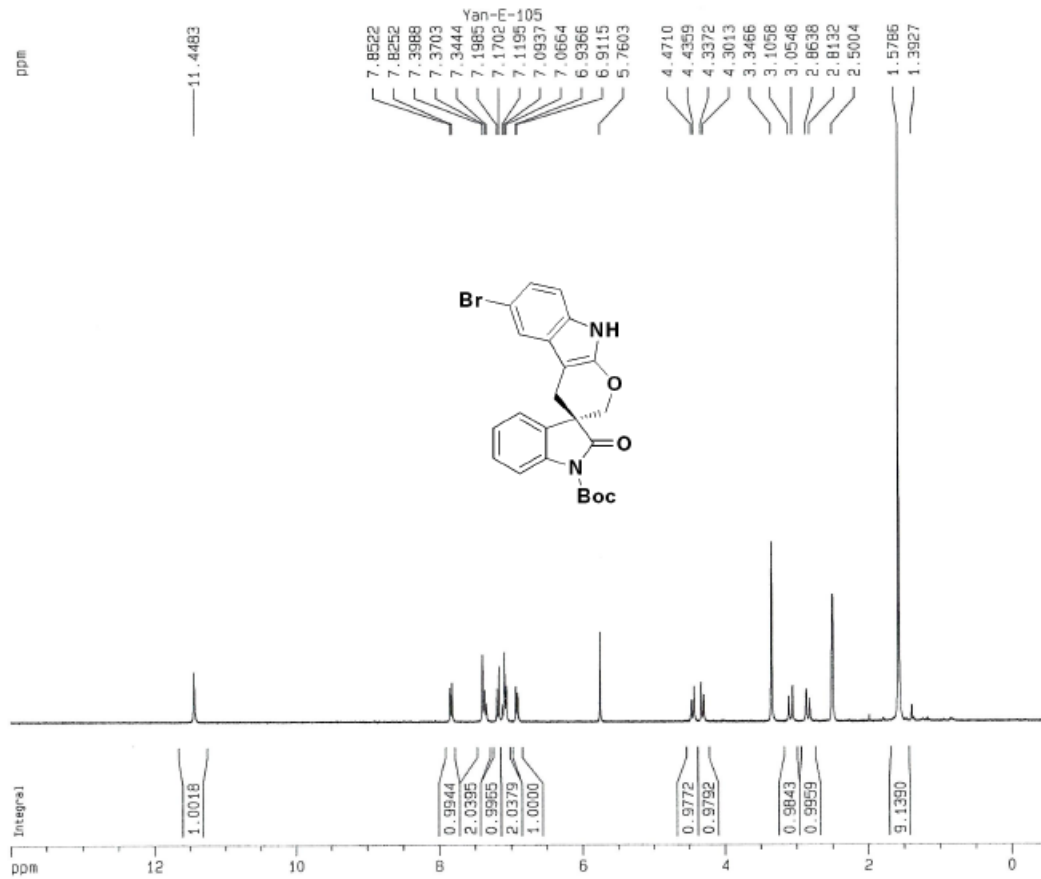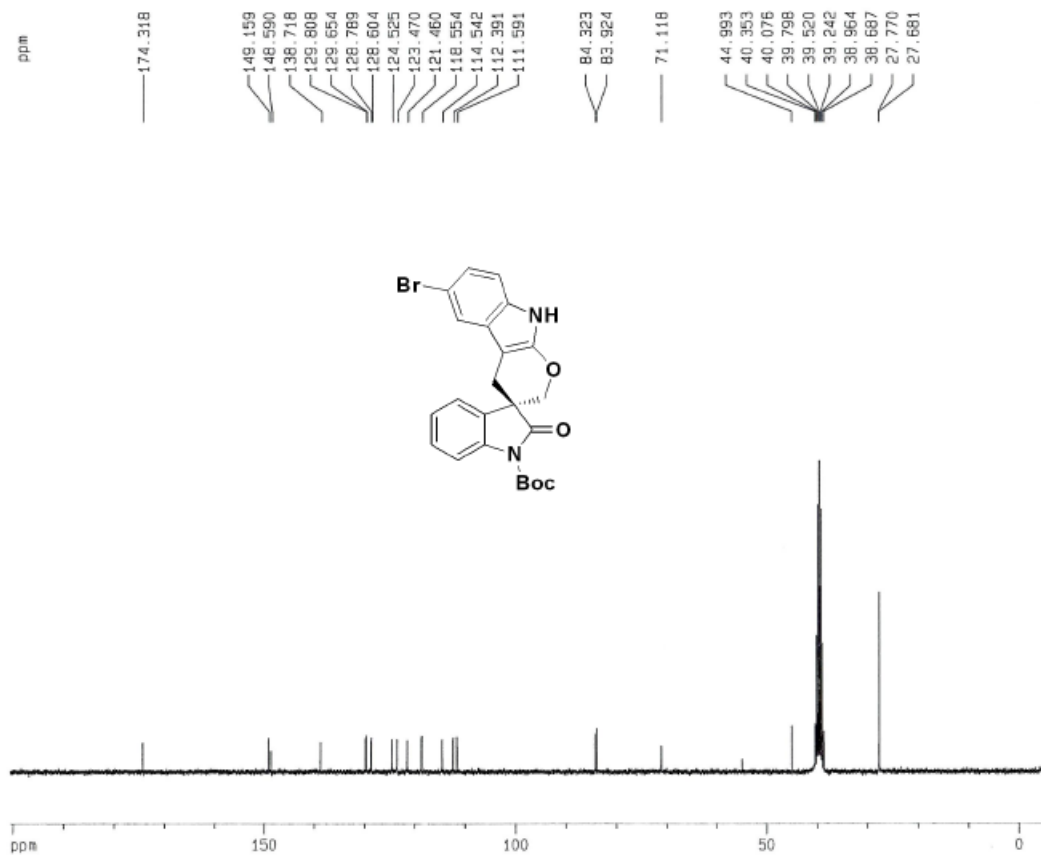

## 2f: Racemic

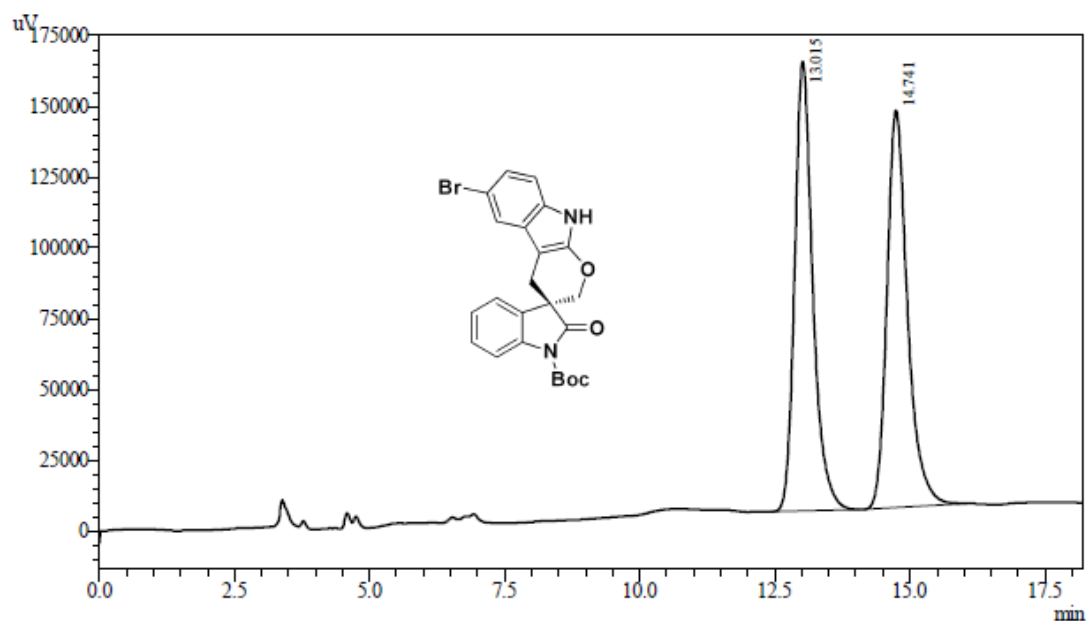

Detector A Ch1 254nm

| Peak# | Ret. Time | Area    | Height | Area %  | Height % |
|-------|-----------|---------|--------|---------|----------|
| 1     | 13.015    | 3708730 | 158892 | 49.822  | 53.104   |
| 2     | 14.741    | 3735170 | 140316 | 50.178  | 46.896   |
| Total |           | 7443900 | 299209 | 100.000 | 100.000  |

## 2f: Chiral

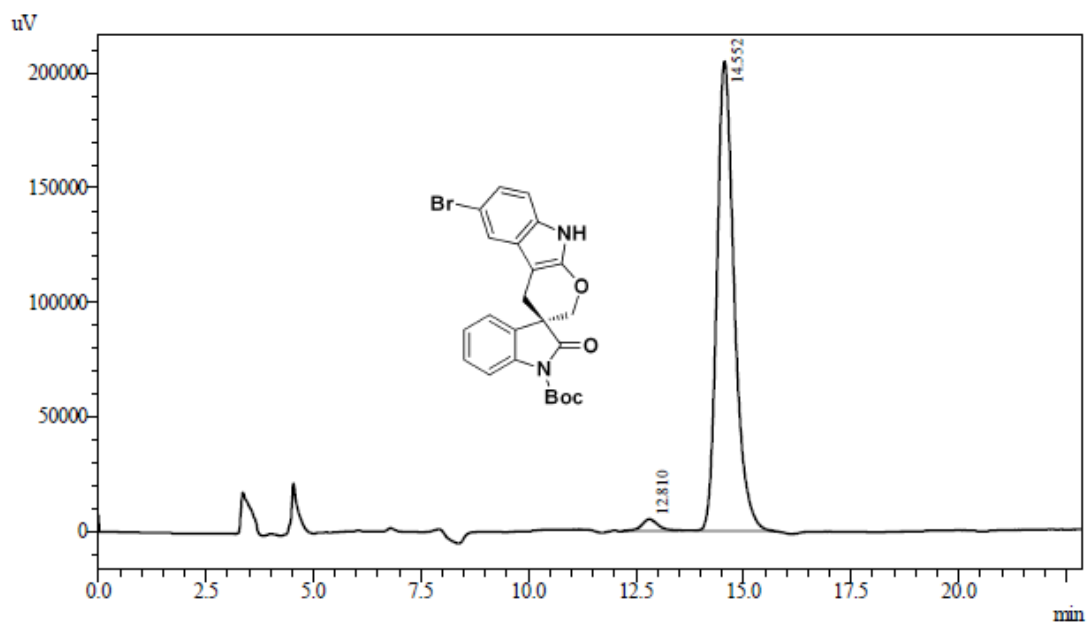

Detector A Ch1 254nm

| Peak# | Ret. Time | Area    | Height | Area %  | Height % |
|-------|-----------|---------|--------|---------|----------|
| 1     | 12.810    | 138135  | 5111   | 2.340   | 2.434    |
| 2     | 14.552    | 5764087 | 204880 | 97.660  | 97.566   |
| Total |           | 5902222 | 209991 | 100.000 | 100.000  |



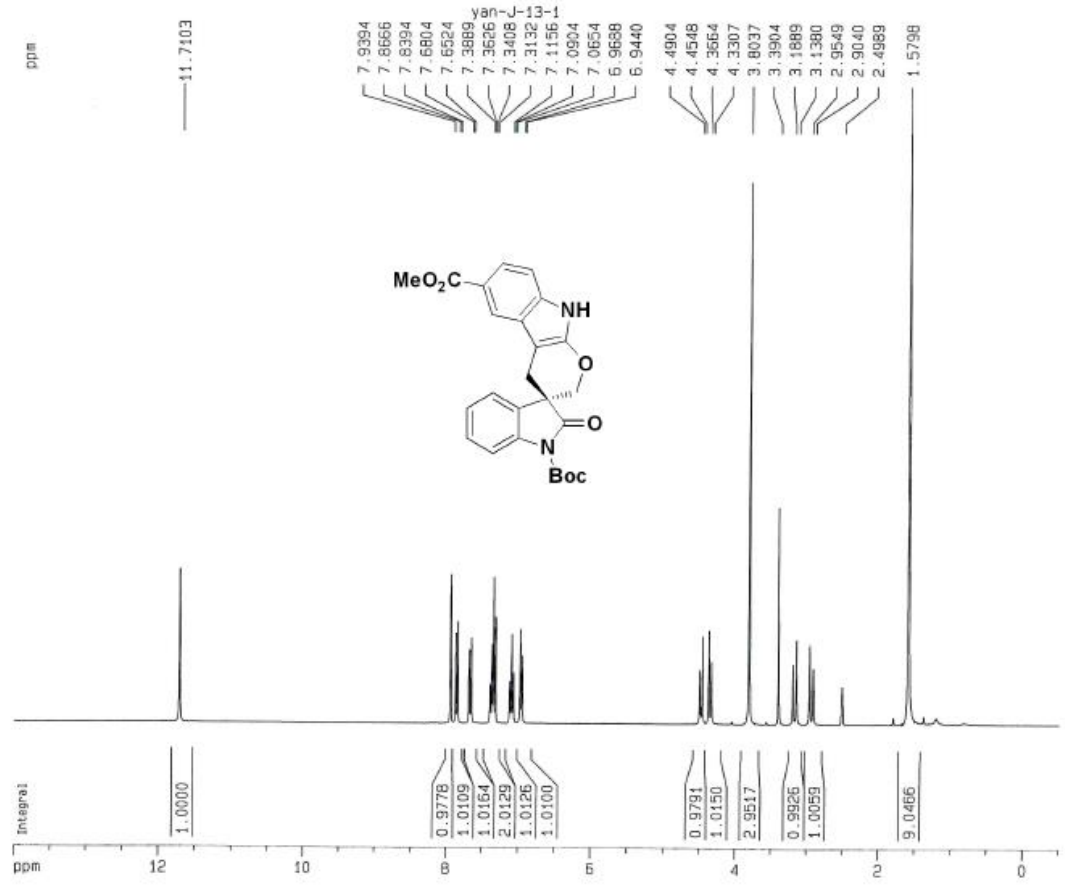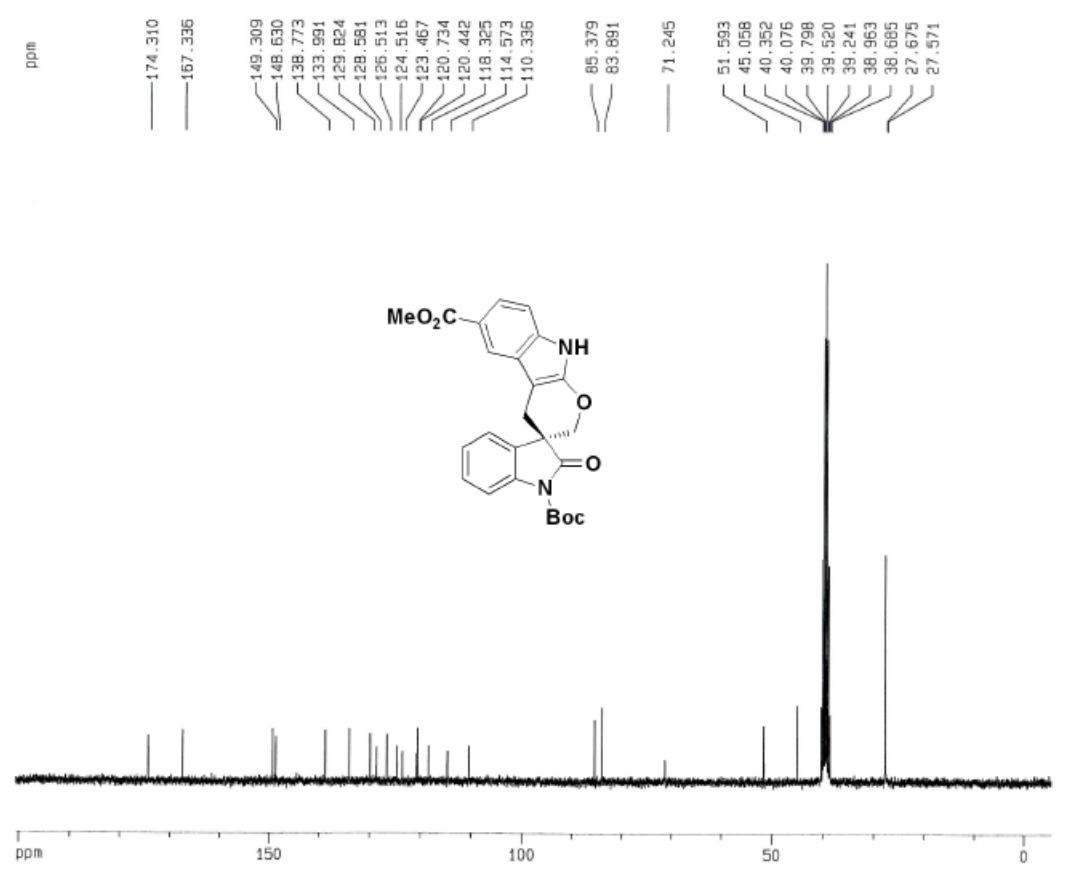

## 2g: Racemic

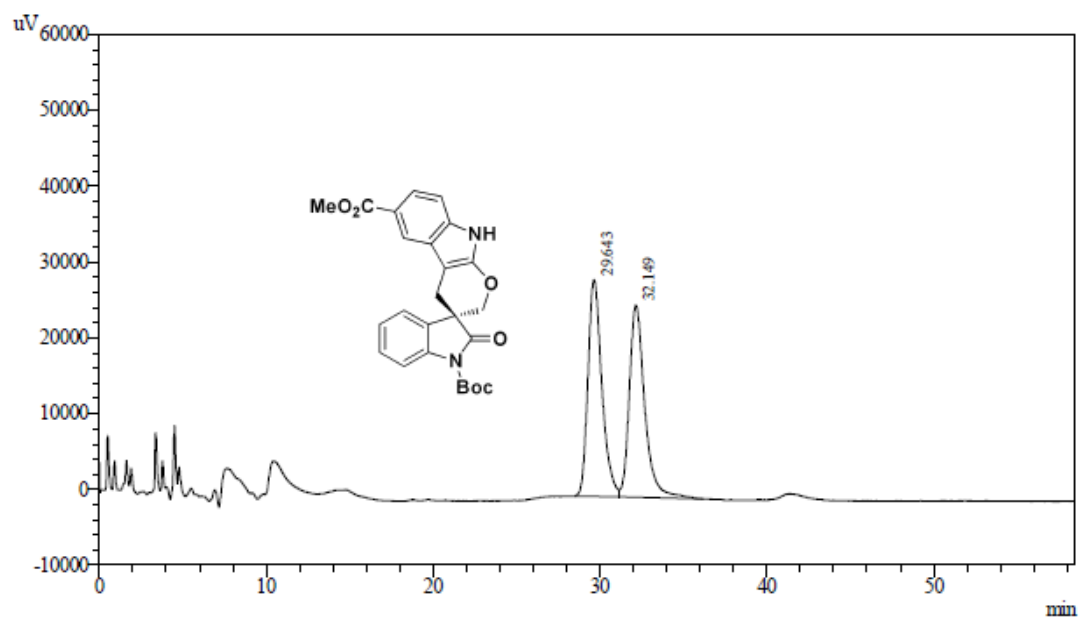

Detector A Ch1 254nm

| Peak# | Ret. Time | Area    | Height | Area %  | Height % |
|-------|-----------|---------|--------|---------|----------|
| 1     | 29.643    | 1658835 | 28572  | 50.457  | 52.987   |
| 2     | 32.149    | 1628783 | 25350  | 49.543  | 47.013   |
| Total |           | 3287618 | 53922  | 100.000 | 100.000  |

## 2g: Chiral

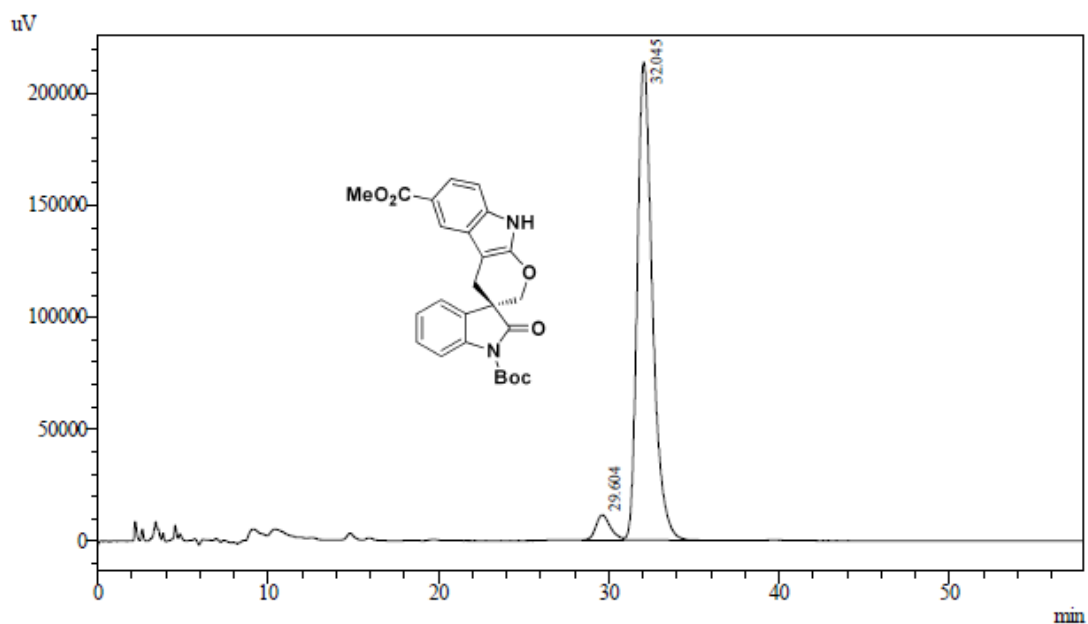

Detector A Ch1 254nm

| Peak# | Ret. Time | Area     | Height | Area %  | Height % |
|-------|-----------|----------|--------|---------|----------|
| 1     | 29.604    | 653155   | 11174  | 4.716   | 4.975    |
| 2     | 32.045    | 13195861 | 213434 | 95.284  | 95.025   |
| Total |           | 13849016 | 224608 | 100.000 | 100.000  |

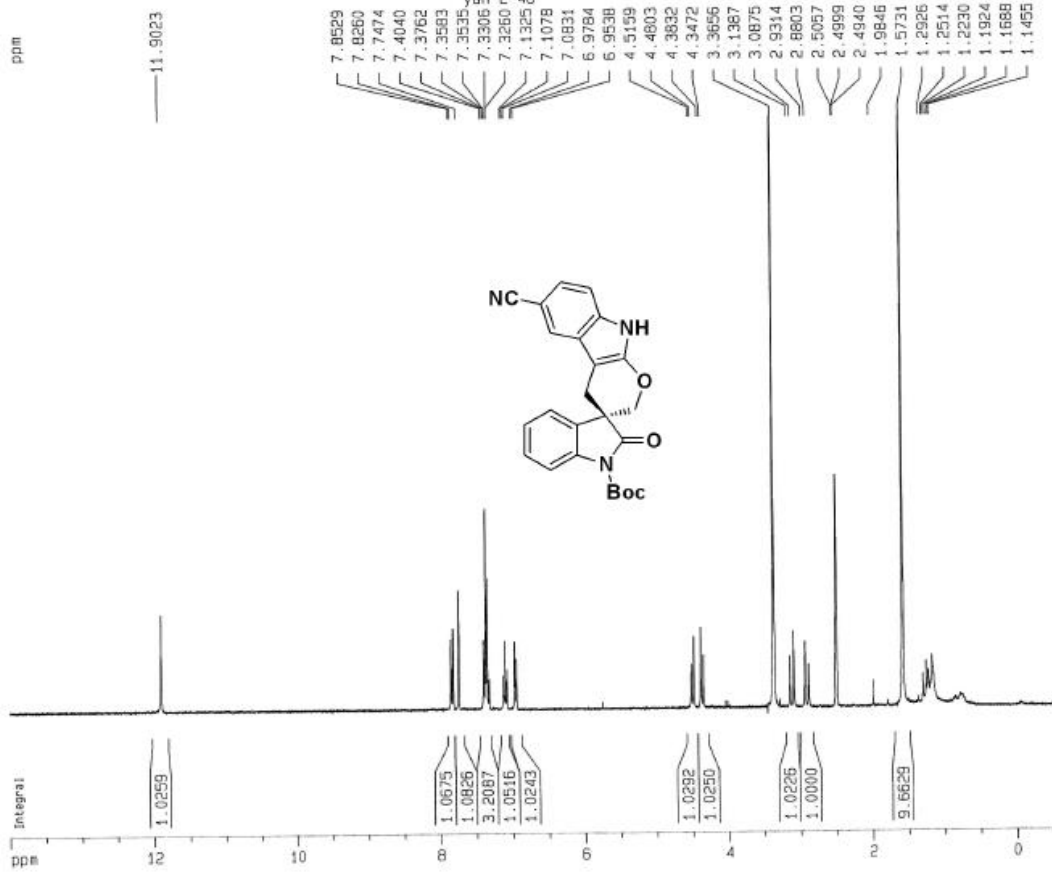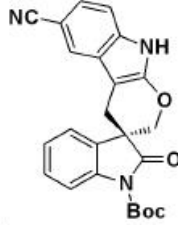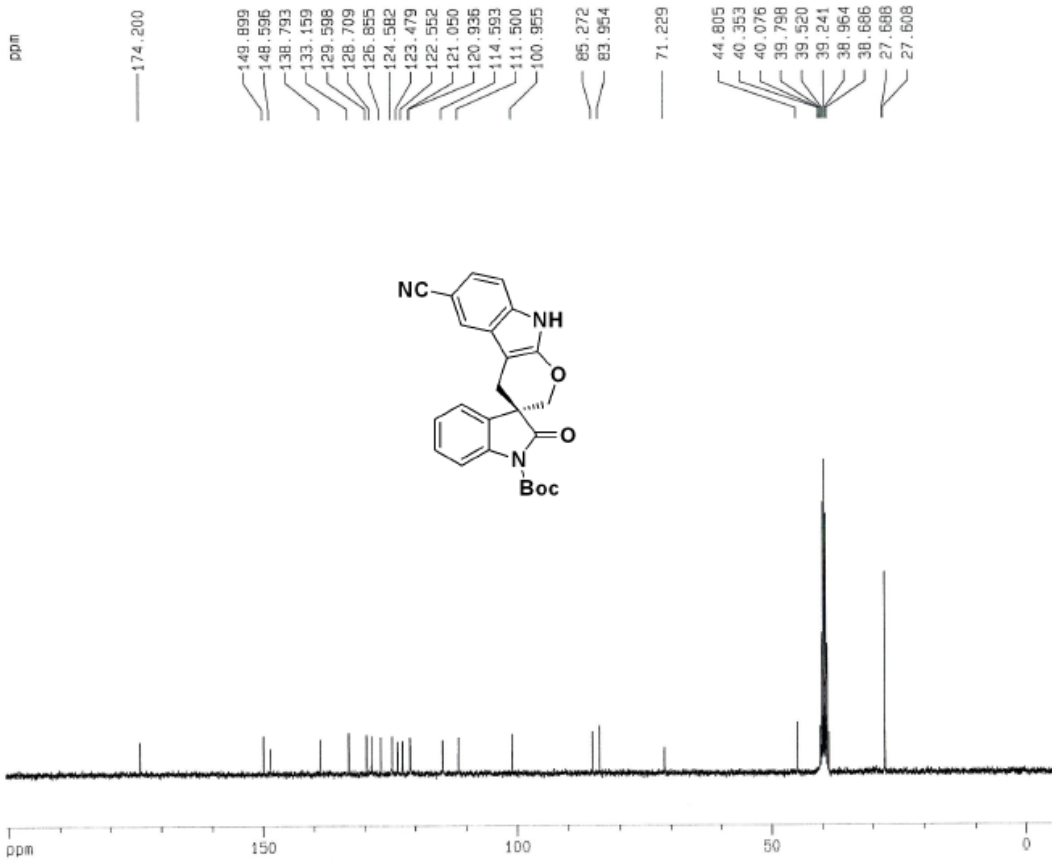

## 2h: Racemic

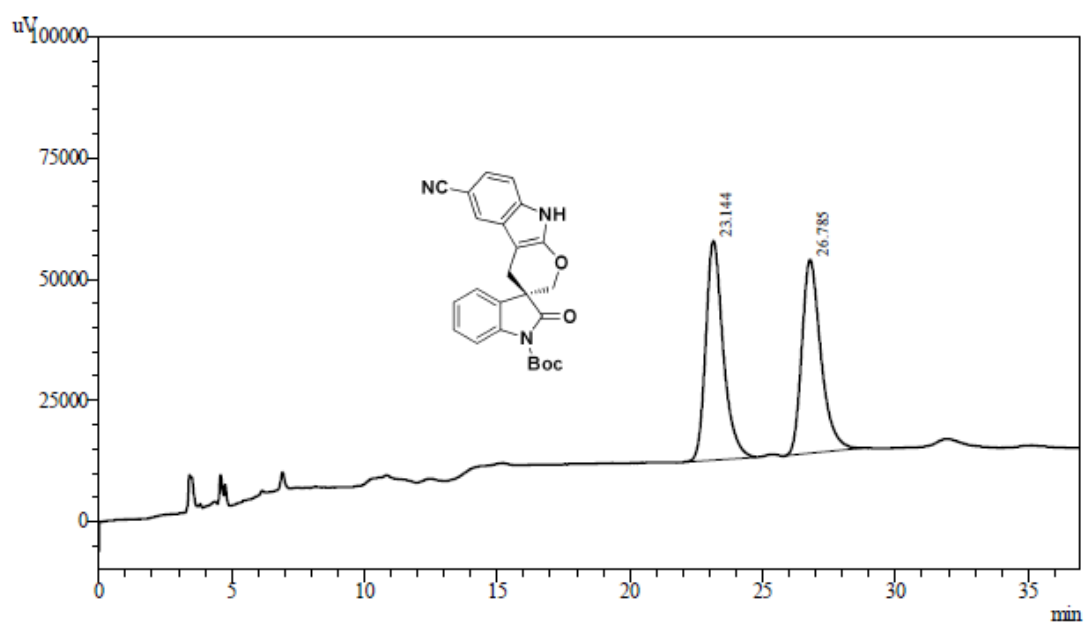

Detector A Ch1 254nm

| Peak# | Ret. Time | Area    | Height | Area %  | Height % |
|-------|-----------|---------|--------|---------|----------|
| 1     | 23.144    | 2071714 | 45208  | 50.814  | 53.080   |
| 2     | 26.785    | 2005366 | 39961  | 49.186  | 46.920   |
| Total |           | 4077080 | 85169  | 100.000 | 100.000  |

## 2h: Chiral

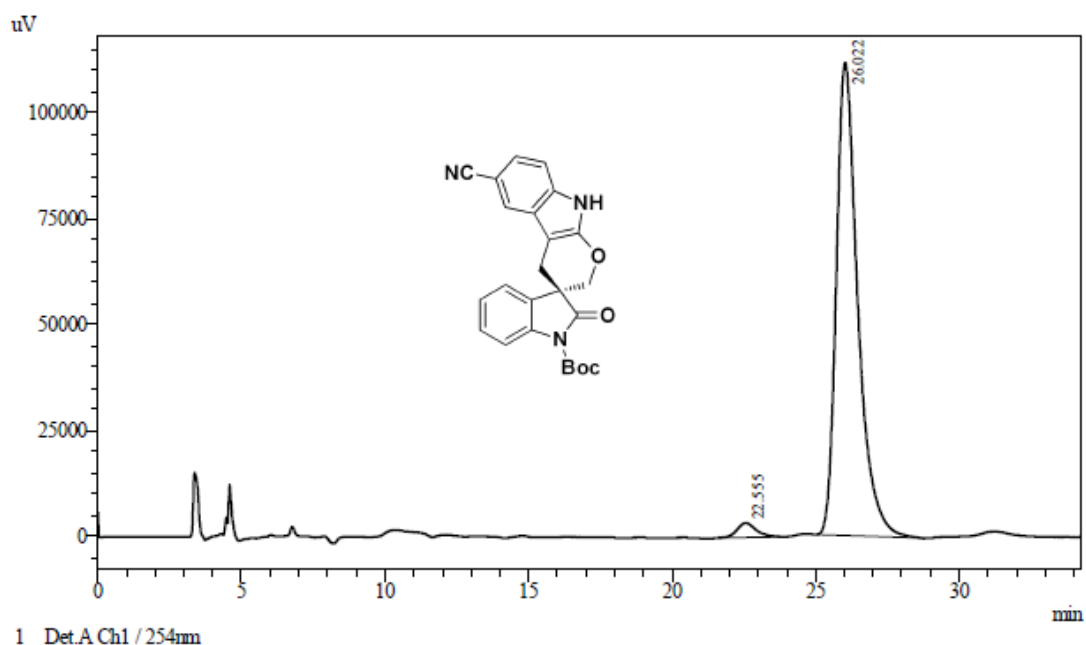

Detector A Ch1 254nm

| Peak# | Ret. Time | Area    | Height | Area %  | Height % |
|-------|-----------|---------|--------|---------|----------|
| 1     | 22.555    | 153002  | 3360   | 2.566   | 2.922    |
| 2     | 26.022    | 5810450 | 111624 | 97.434  | 97.078   |
| Total |           | 5963452 | 114984 | 100.000 | 100.000  |

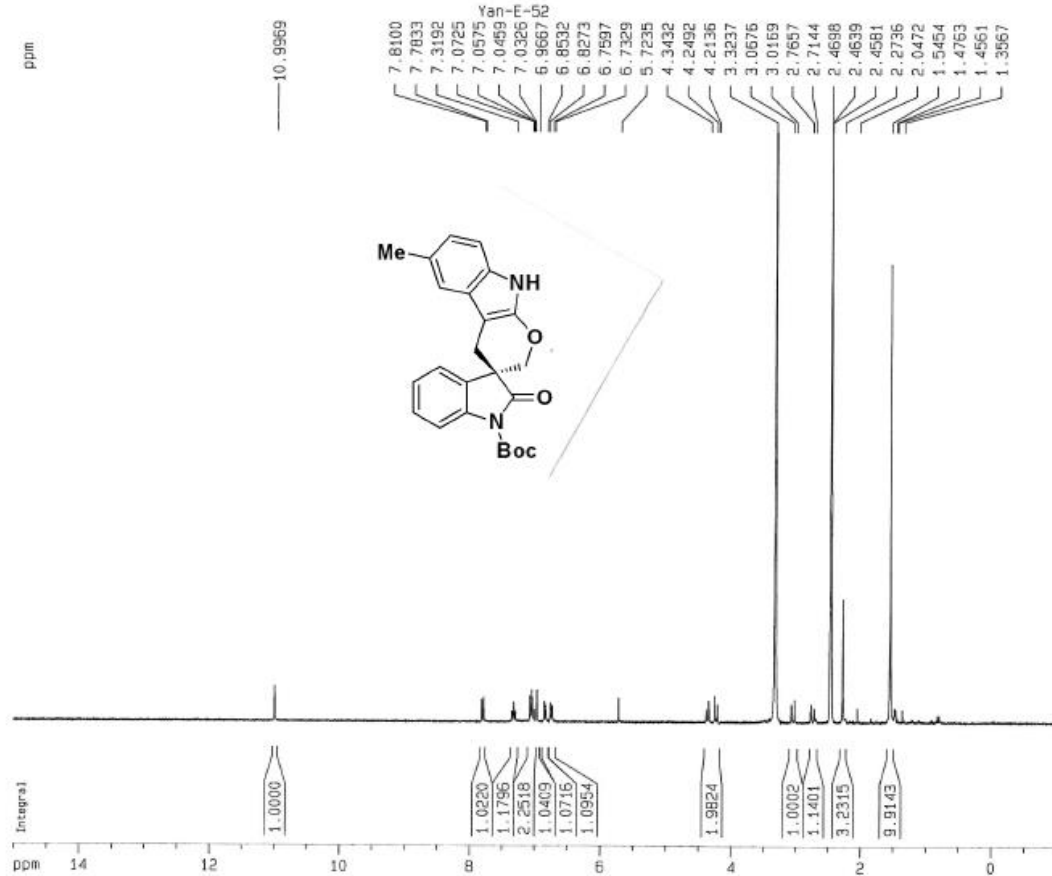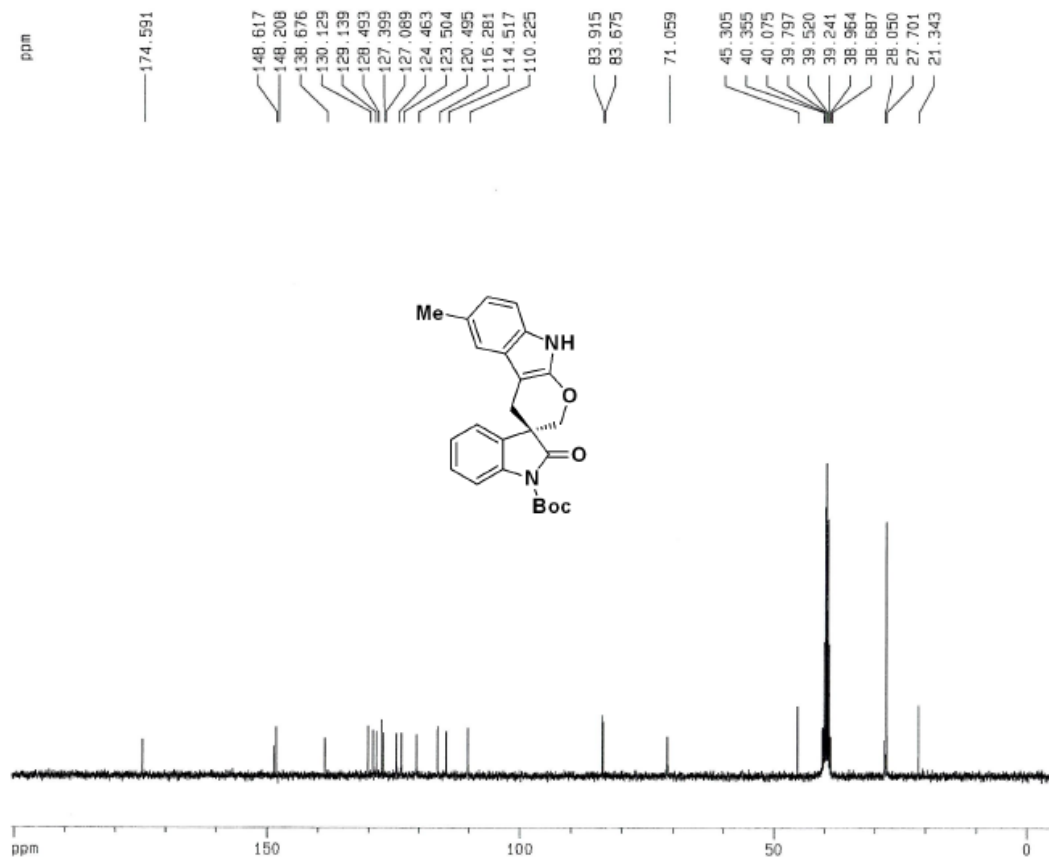

**2i: Racemic**

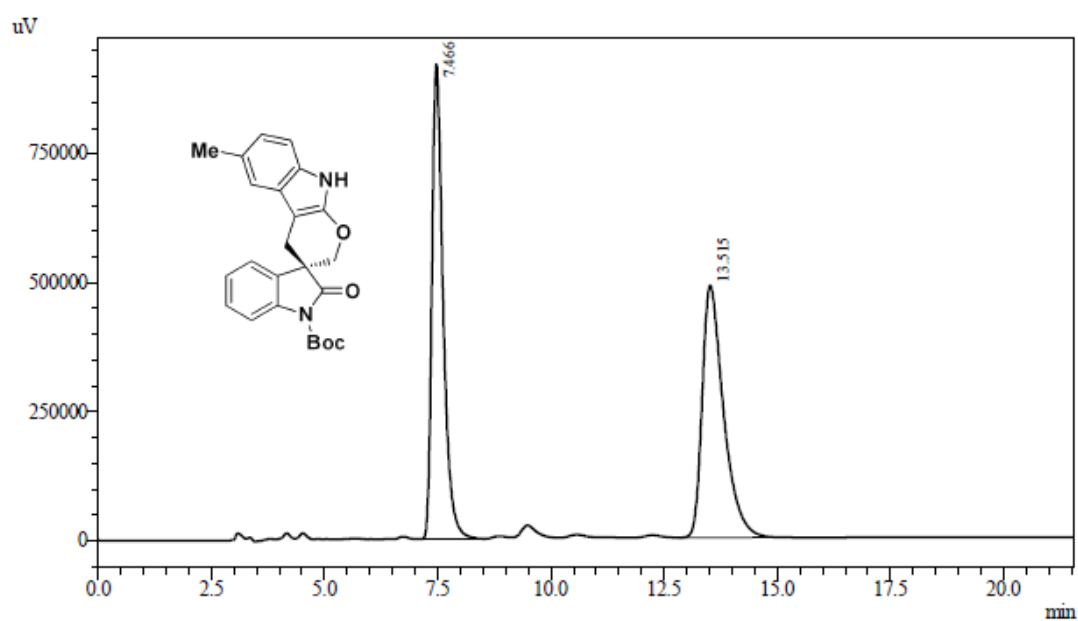

1 Det.A Ch1 /254nm

Detector A Ch1 254nm

| Peak# | Ret. Time | Area     | Height  | Area %  | Height % |
|-------|-----------|----------|---------|---------|----------|
| 1     | 7.466     | 15855168 | 920666  | 49.656  | 65.309   |
| 2     | 13.515    | 16075112 | 489041  | 50.344  | 34.691   |
| Total |           | 31930280 | 1409708 | 100.000 | 100.000  |

**2i: Chiral**

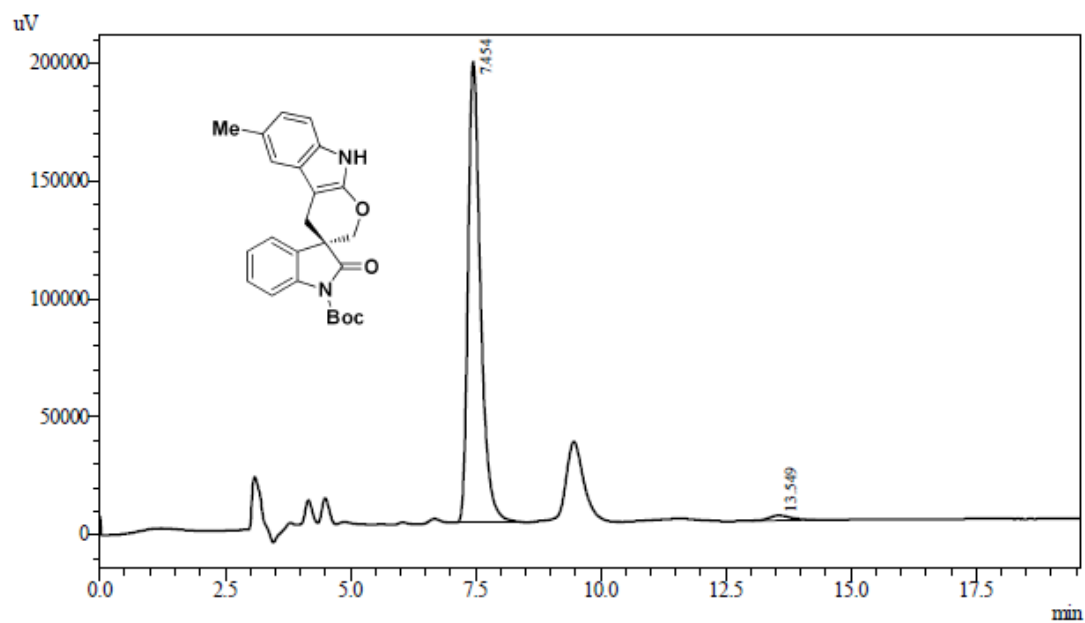

1 Det.A Ch1 /254nm

Detector A Ch1 254nm

| Peak# | Ret. Time | Area    | Height | Area %  | Height % |
|-------|-----------|---------|--------|---------|----------|
| 1     | 7.454     | 3402720 | 195444 | 98.189  | 98.962   |
| 2     | 13.549    | 62766   | 2049   | 1.811   | 1.038    |
| Total |           | 3465486 | 197493 | 100.000 | 100.000  |

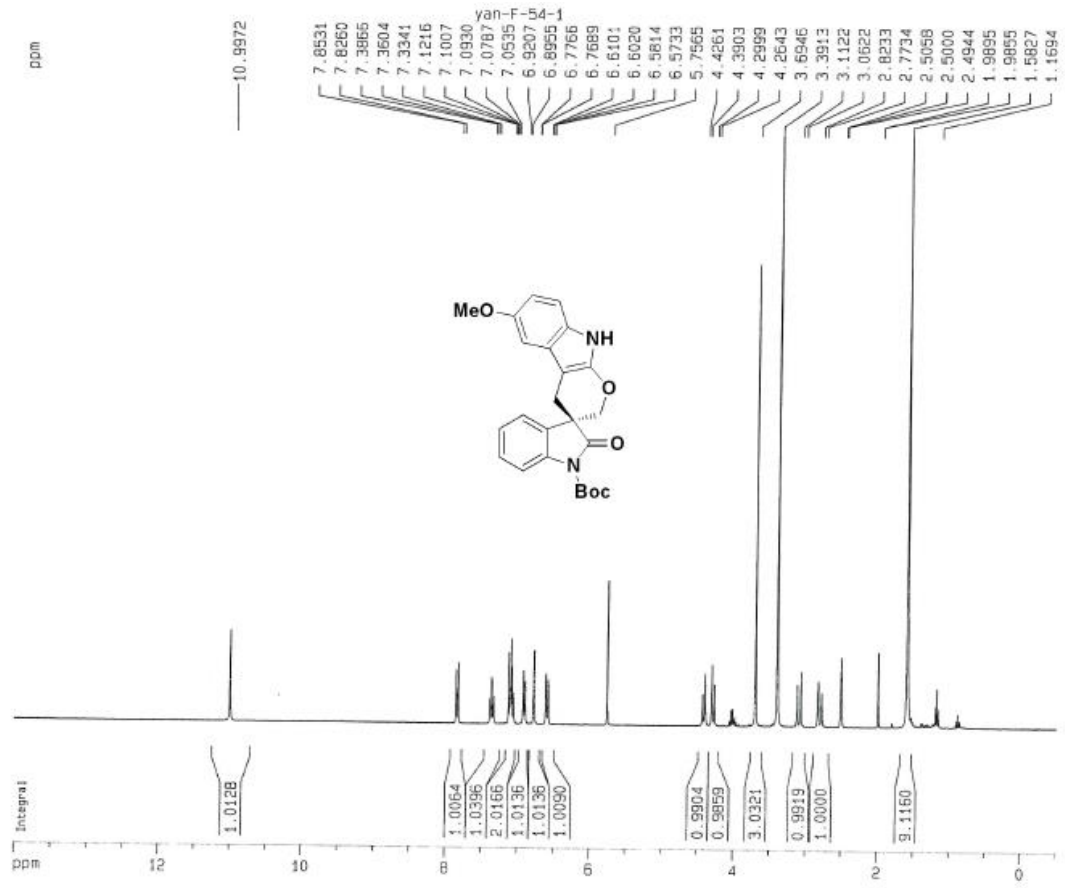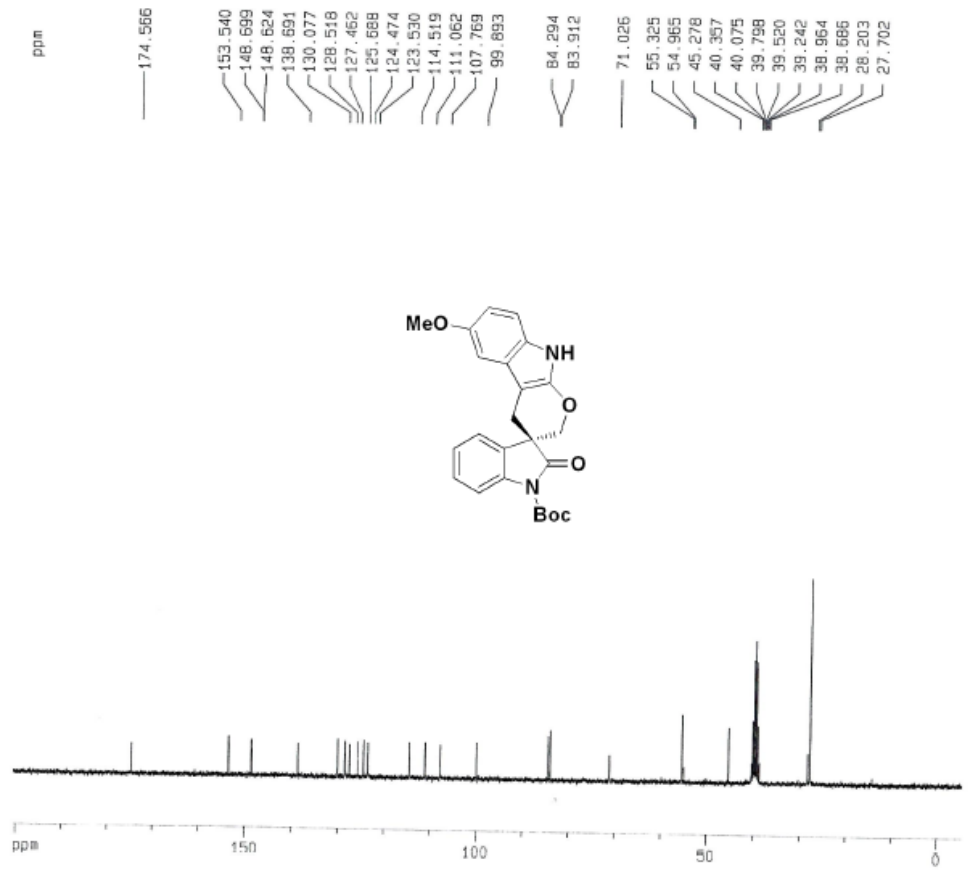

## 2j: Racemic

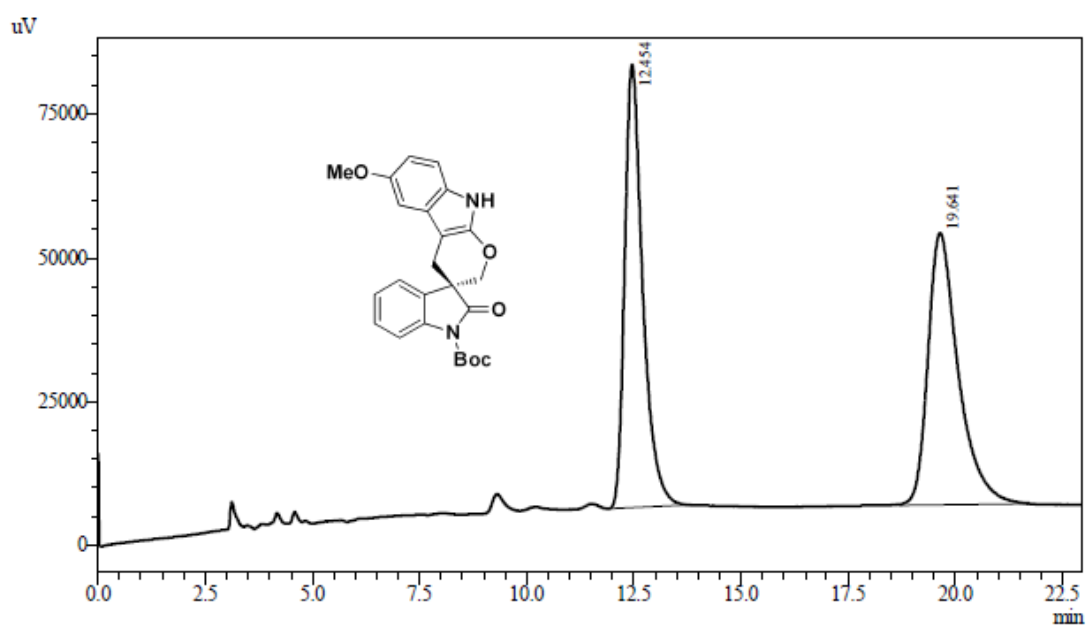

1 Det.A Ch1 / 254nm

Detector A Ch1 254nm

| Peak# | Ret. Time | Area    | Height | Area %  | Height % |
|-------|-----------|---------|--------|---------|----------|
| 1     | 12.454    | 2261388 | 77022  | 49.293  | 61.998   |
| 2     | 19.641    | 2326243 | 47210  | 50.707  | 38.002   |
| Total |           | 4587632 | 124232 | 100.000 | 100.000  |

## 2j: Chiral

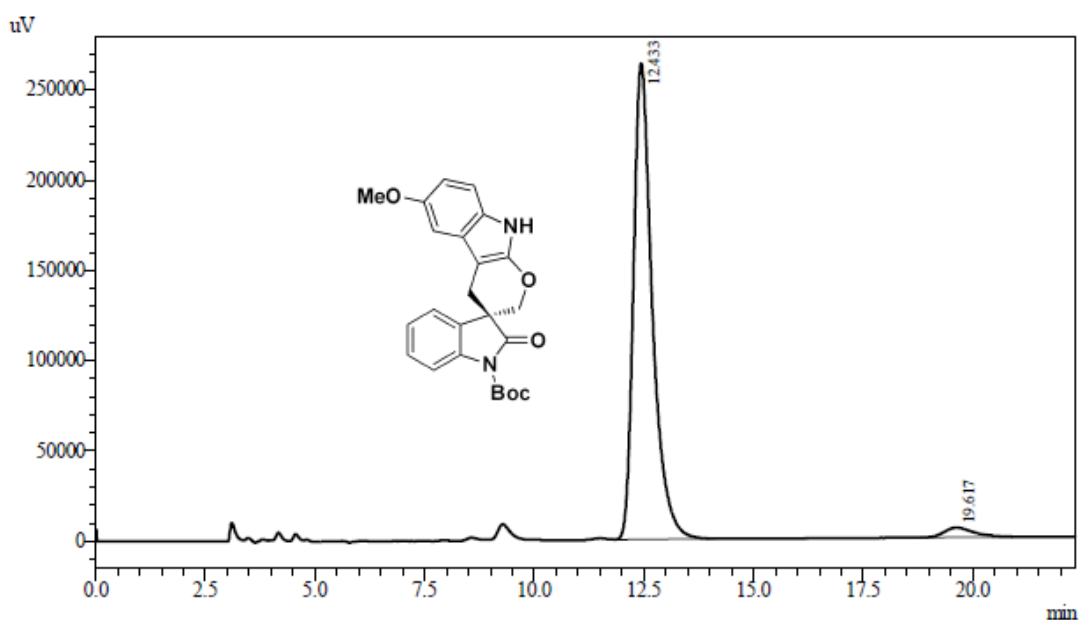

1 Det.A Ch1 / 254nm

Detector A Ch1 254nm

| Peak# | Ret. Time | Area    | Height | Area %  | Height % |
|-------|-----------|---------|--------|---------|----------|
| 1     | 12.433    | 7872148 | 263600 | 96.937  | 98.019   |
| 2     | 19.617    | 248704  | 5328   | 3.063   | 1.981    |
| Total |           | 8120852 | 268928 | 100.000 | 100.000  |



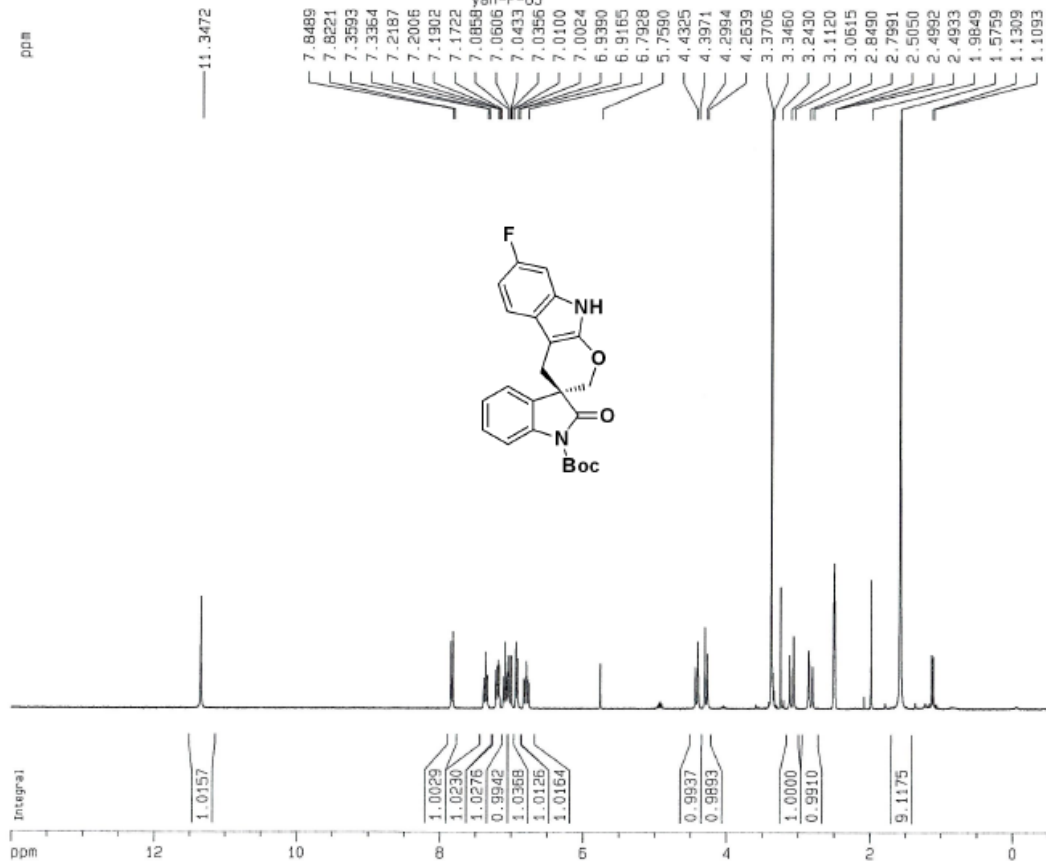

## 2k: Racemic

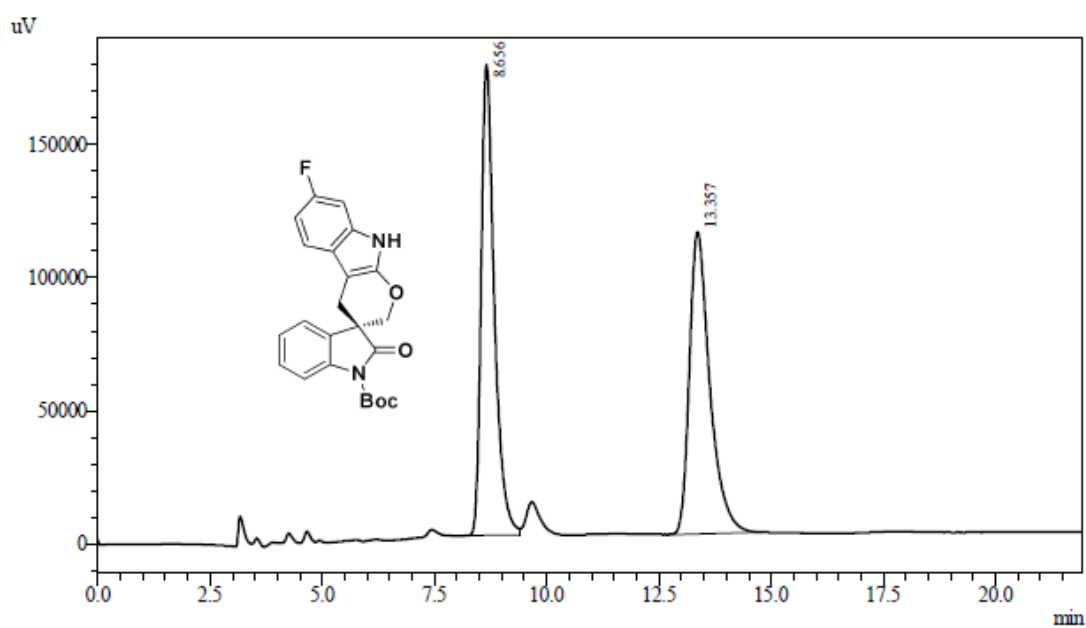

1 Det.A Ch1 /254nm

Detector A Ch1 254nm

| Peak# | Ret. Time | Area    | Height | Area %  | Height % |
|-------|-----------|---------|--------|---------|----------|
| 1     | 8.656     | 3613396 | 176537 | 50.180  | 60.923   |
| 2     | 13.357    | 3587439 | 113232 | 49.820  | 39.077   |
| Total |           | 7200835 | 289769 | 100.000 | 100.000  |

## 2k: Chiral

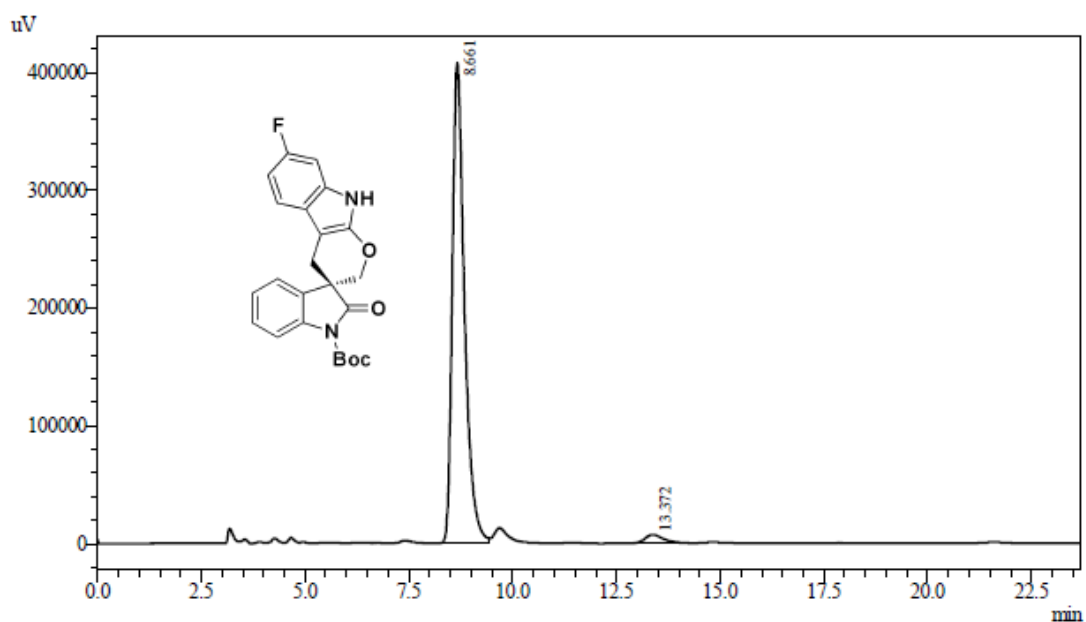

1 Det.A Ch1 /254nm

Detector A Ch1 254nm

| Peak# | Ret. Time | Area    | Height | Area %  | Height % |
|-------|-----------|---------|--------|---------|----------|
| 1     | 8.661     | 8299995 | 407951 | 97.322  | 98.254   |
| 2     | 13.372    | 228353  | 7251   | 2.678   | 1.746    |
| Total |           | 8528348 | 415202 | 100.000 | 100.000  |

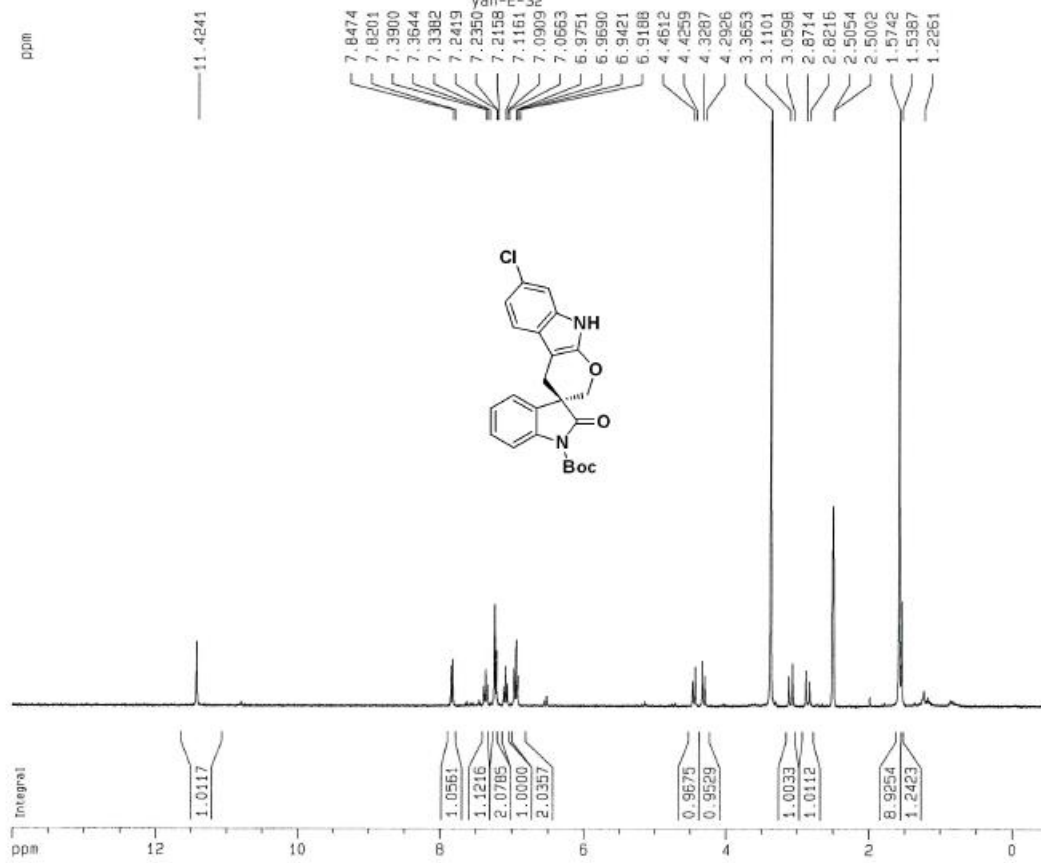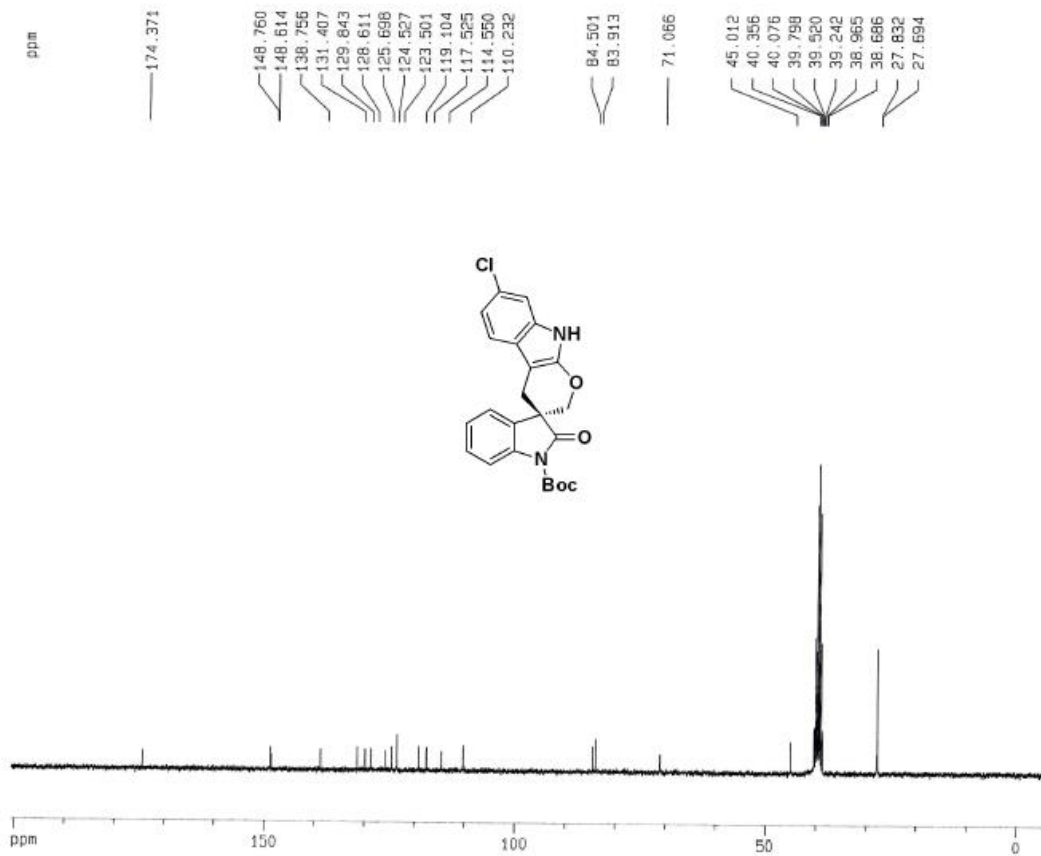

## 2l: Racemic

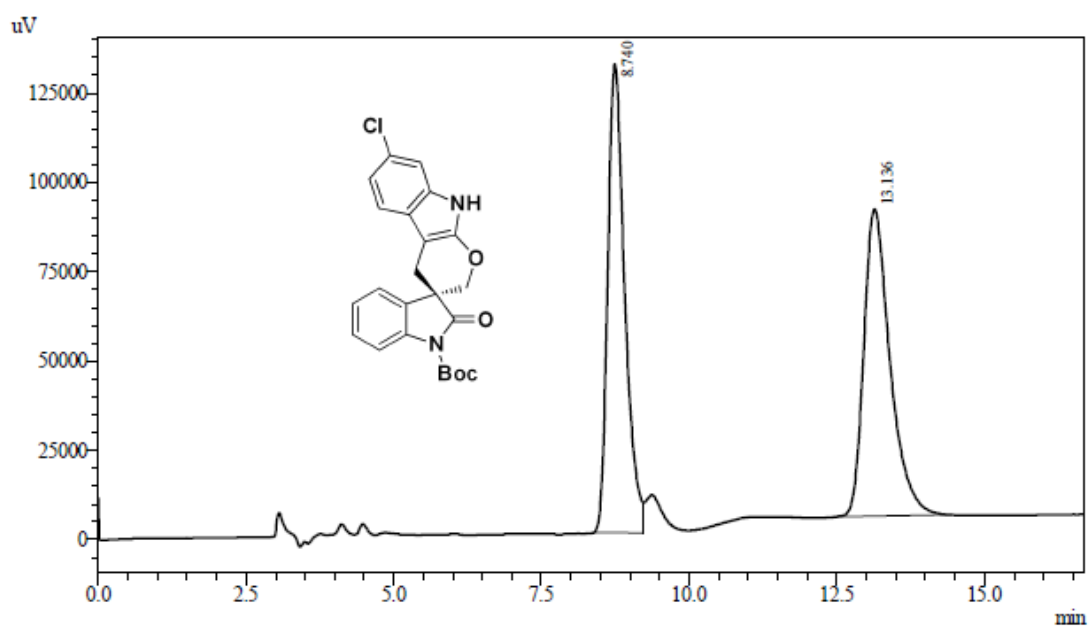

1 Det.A Ch1 / 254nm

Detector A Ch1 254nm

| Peak# | Ret. Time | Area    | Height | Area %  | Height % |
|-------|-----------|---------|--------|---------|----------|
| 1     | 8.740     | 2631616 | 131131 | 49.801  | 60.400   |
| 2     | 13.136    | 2652663 | 85972  | 50.199  | 39.600   |
| Total |           | 5284279 | 217103 | 100.000 | 100.000  |

## 2l: Chiral

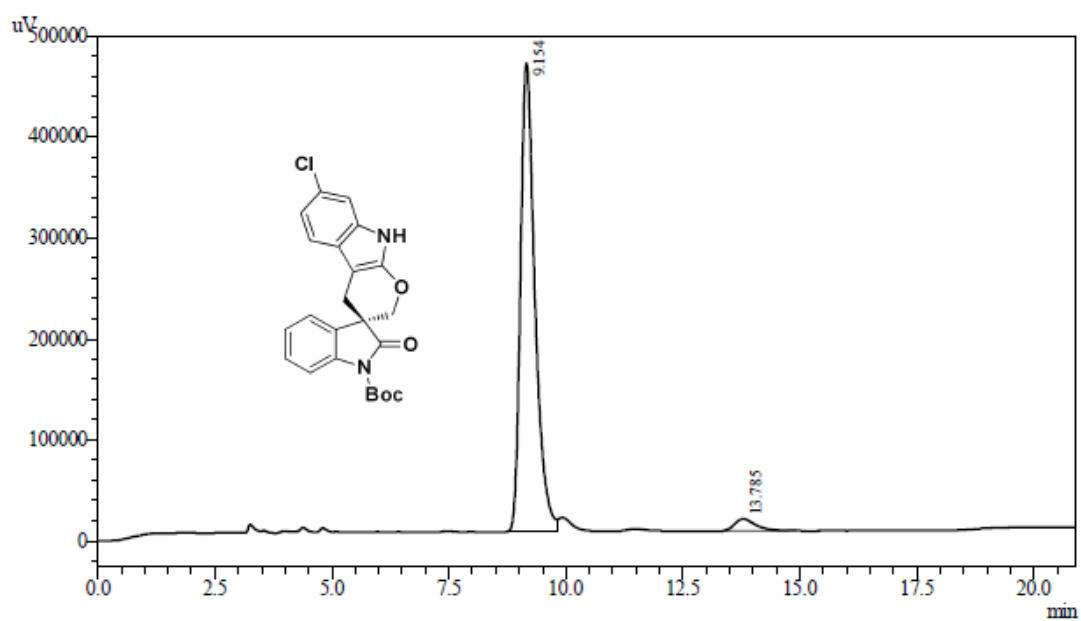

1 Det.A Ch1 / 254nm

Detector A Ch1 254nm

| Peak# | Ret. Time | Area     | Height | Area %  | Height % |
|-------|-----------|----------|--------|---------|----------|
| 1     | 9.154     | 9925194  | 464145 | 96.259  | 97.476   |
| 2     | 13.785    | 385746   | 12019  | 3.741   | 2.524    |
| Total |           | 10310940 | 476164 | 100.000 | 100.000  |

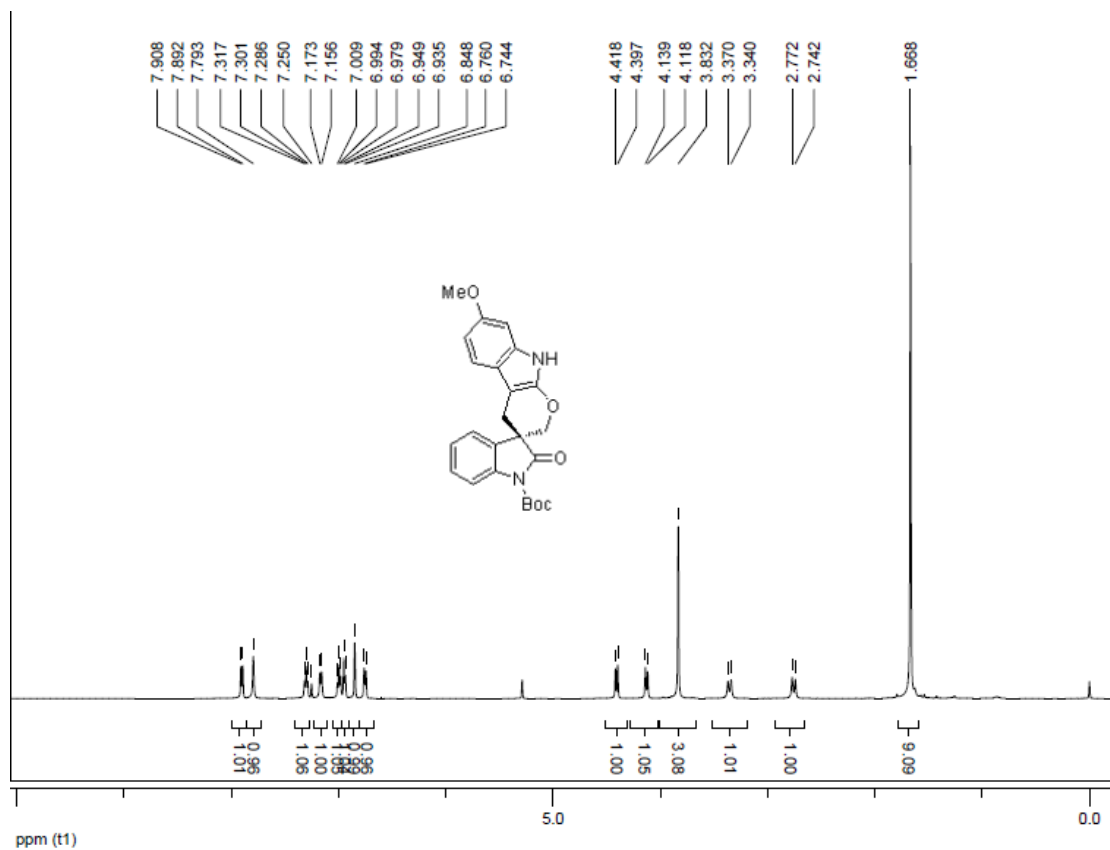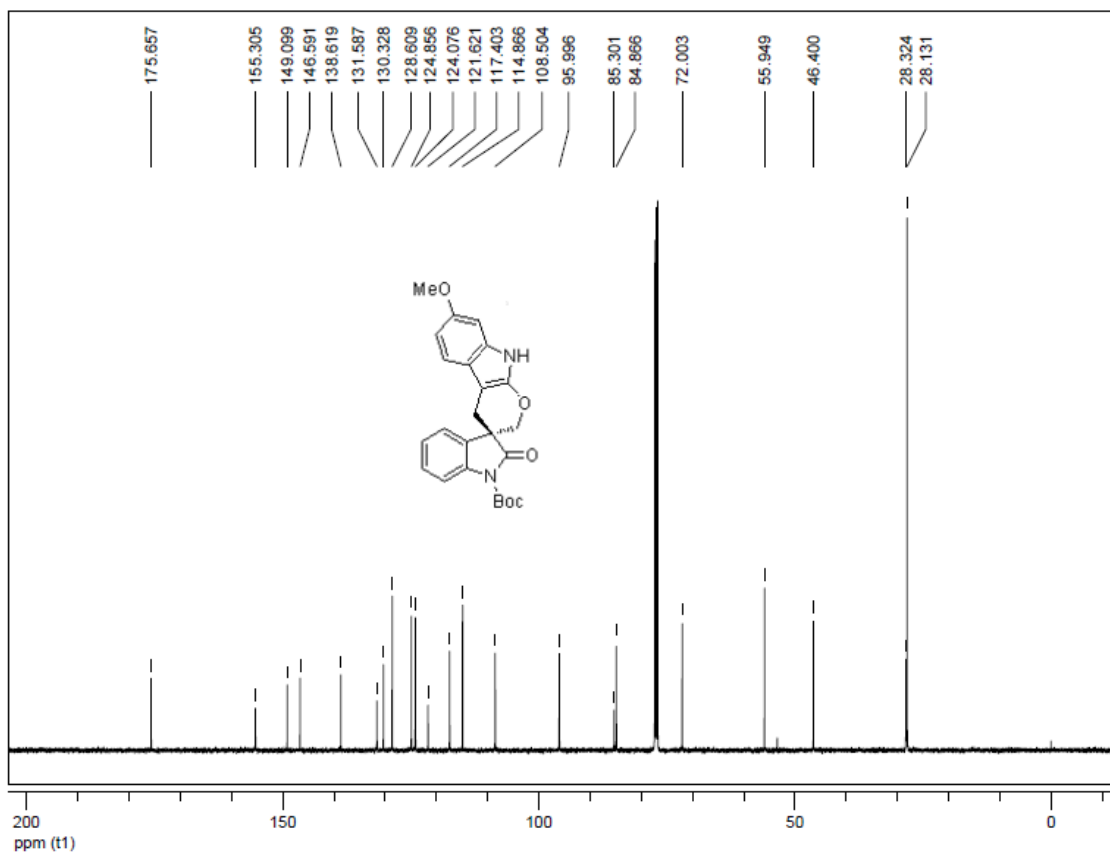

**2m: Racemic**

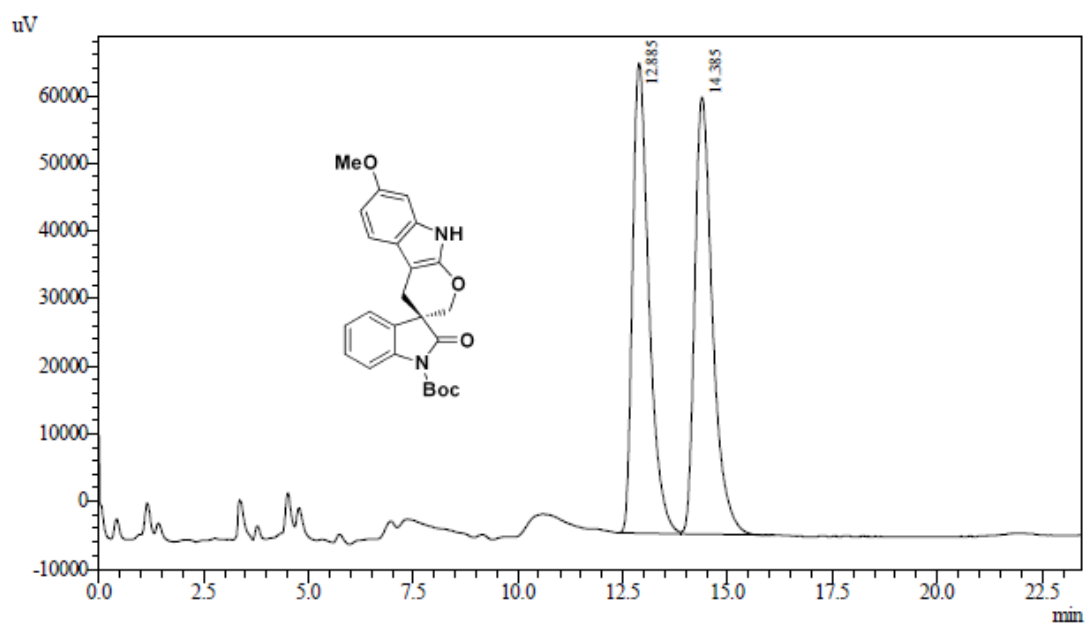

1 Det.A Ch1 /254nm

Detector A Ch1 254nm

| Peak# | Ret. Time | Area    | Height | Area %  | Height % |
|-------|-----------|---------|--------|---------|----------|
| 1     | 12.885    | 1887428 | 69486  | 49.760  | 51.826   |
| 2     | 14.385    | 1905668 | 64589  | 50.240  | 48.174   |
| Total |           | 3793096 | 134075 | 100.000 | 100.000  |

**2m: Chiral**

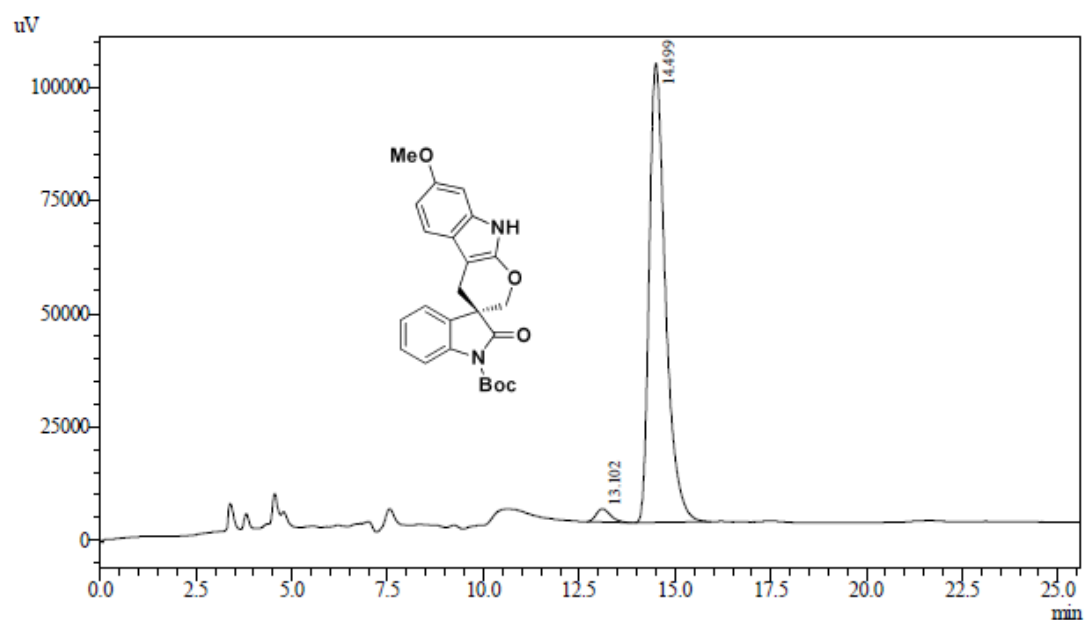

1 Det.A Ch1 /254nm

Detector A Ch1 254nm

| Peak# | Ret. Time | Area    | Height | Area %  | Height % |
|-------|-----------|---------|--------|---------|----------|
| 1     | 13.102    | 76980   | 2925   | 2.504   | 2.804    |
| 2     | 14.499    | 2997909 | 101379 | 97.496  | 97.196   |
| Total |           | 3074889 | 104304 | 100.000 | 100.000  |

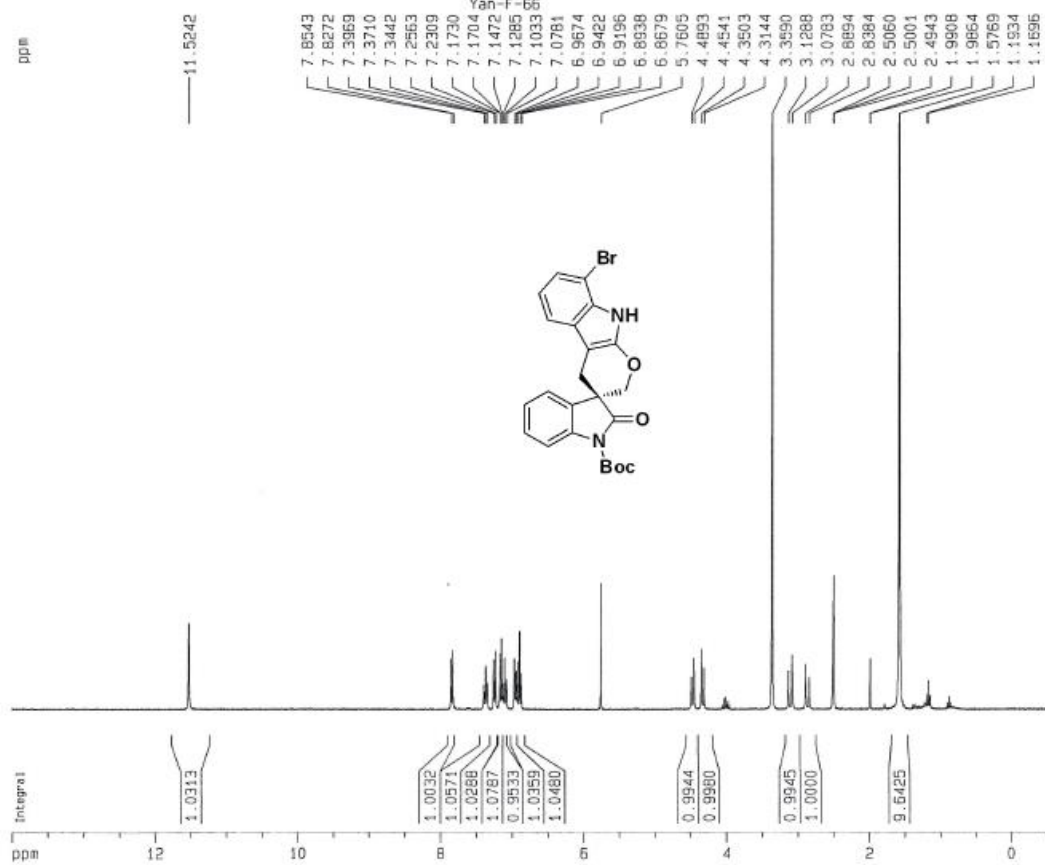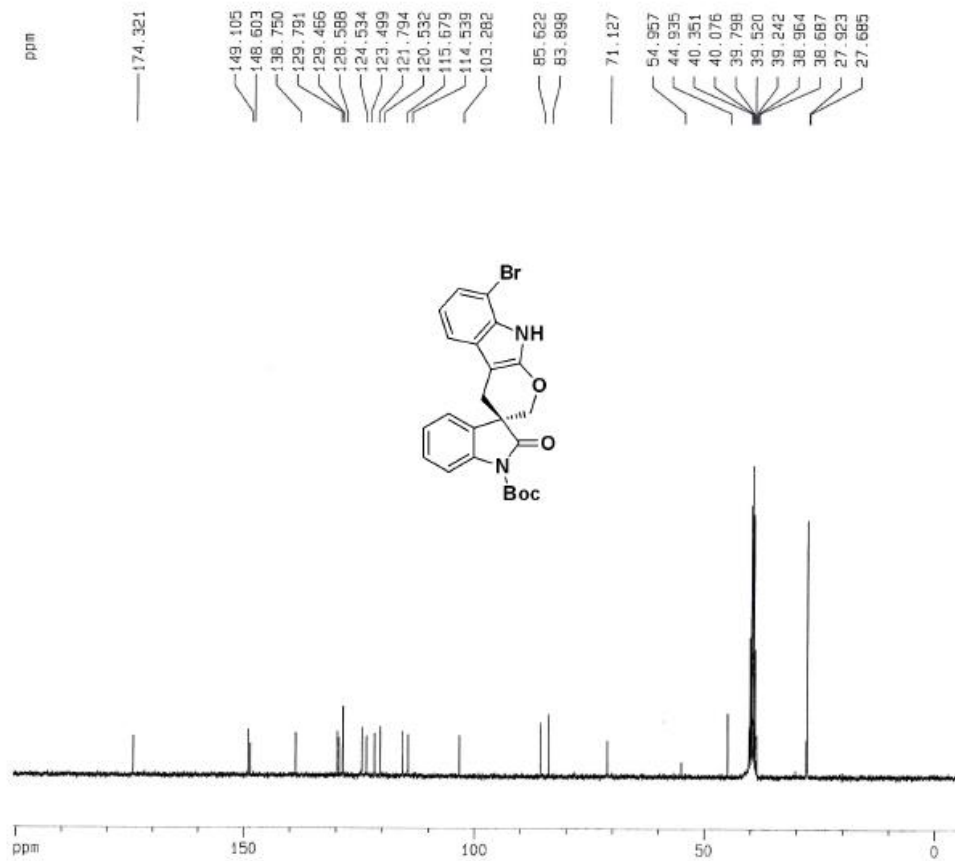

## 2n: Racemic

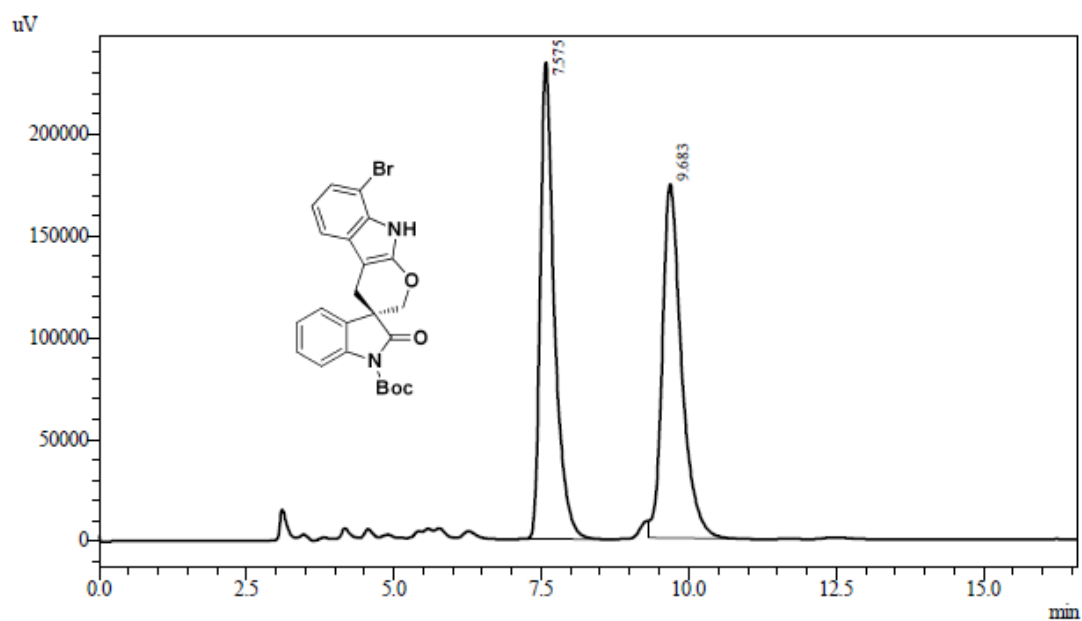

1 Det.A Ch1 / 254nm

Detector A Ch1 254nm

| Peak# | Ret. Time | Area    | Height | Area %  | Height % |
|-------|-----------|---------|--------|---------|----------|
| 1     | 7.575     | 3882755 | 233855 | 49.586  | 57.395   |
| 2     | 9.683     | 3947621 | 173595 | 50.414  | 42.605   |
| Total |           | 7830376 | 407450 | 100.000 | 100.000  |

## 2n: Chiral

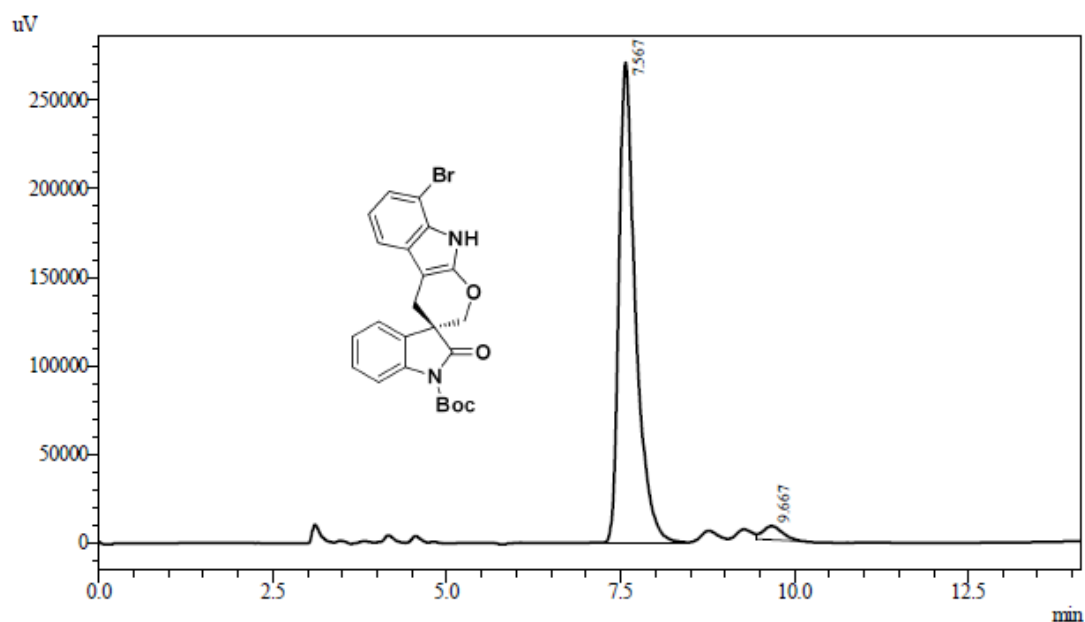

1 Det.A Ch1 / 254nm

Detector A Ch1 254nm

| Peak# | Ret. Time | Area    | Height | Area %  | Height % |
|-------|-----------|---------|--------|---------|----------|
| 1     | 7.567     | 4491032 | 270323 | 96.700  | 97.217   |
| 2     | 9.667     | 153269  | 7739   | 3.300   | 2.783    |
| Total |           | 4644301 | 278062 | 100.000 | 100.000  |



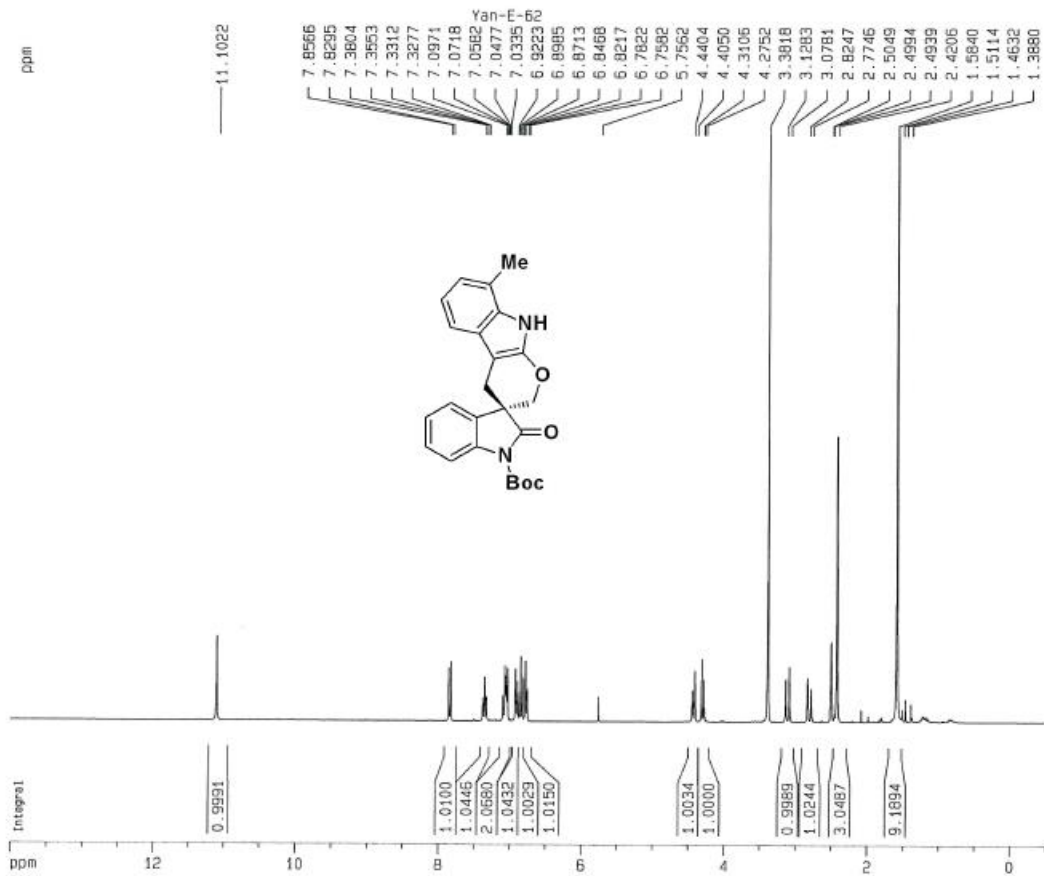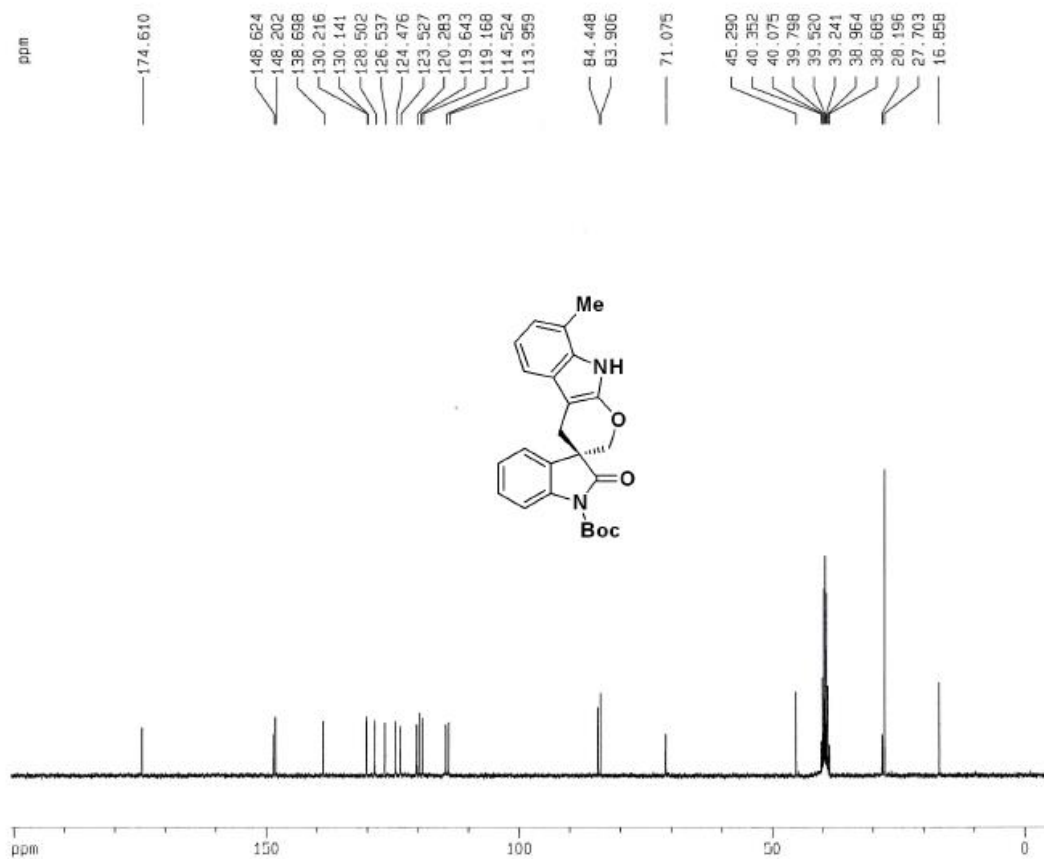

**2o: Racemic**

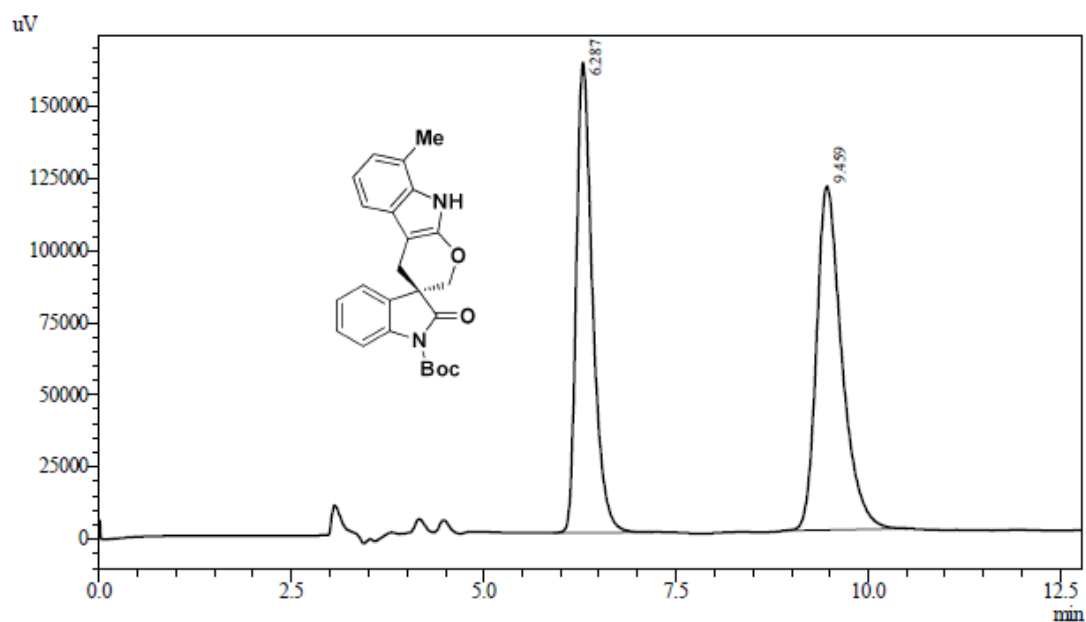

1 Det.A Ch1 / 254nm

Detector A Ch1 254nm

| Peak# | Ret. Time | Area    | Height | Area %  | Height % |
|-------|-----------|---------|--------|---------|----------|
| 1     | 6.287     | 2391233 | 163018 | 46.555  | 57.785   |
| 2     | 9.459     | 2745164 | 119092 | 53.445  | 42.215   |
| Total |           | 5136397 | 282110 | 100.000 | 100.000  |

**2o: Chiral**

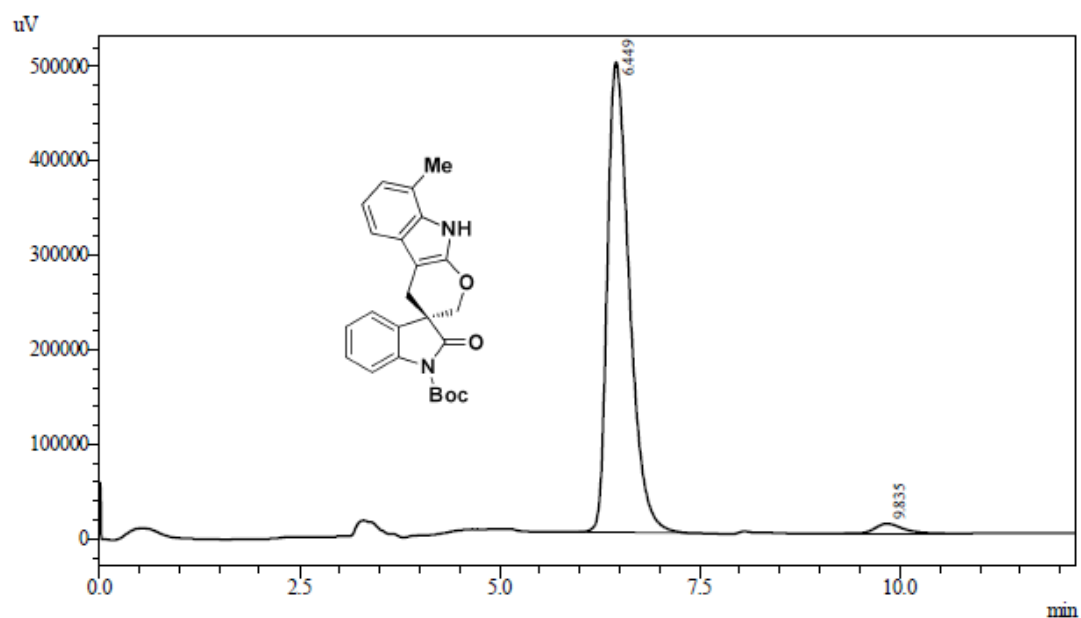

1 Det.A Ch1 / 254nm

Detector A Ch1 254nm

| Peak# | Ret. Time | Area    | Height | Area %  | Height % |
|-------|-----------|---------|--------|---------|----------|
| 1     | 6.449     | 9532034 | 497230 | 97.502  | 97.974   |
| 2     | 9.835     | 244244  | 10281  | 2.498   | 2.026    |
| Total |           | 9776278 | 507511 | 100.000 | 100.000  |

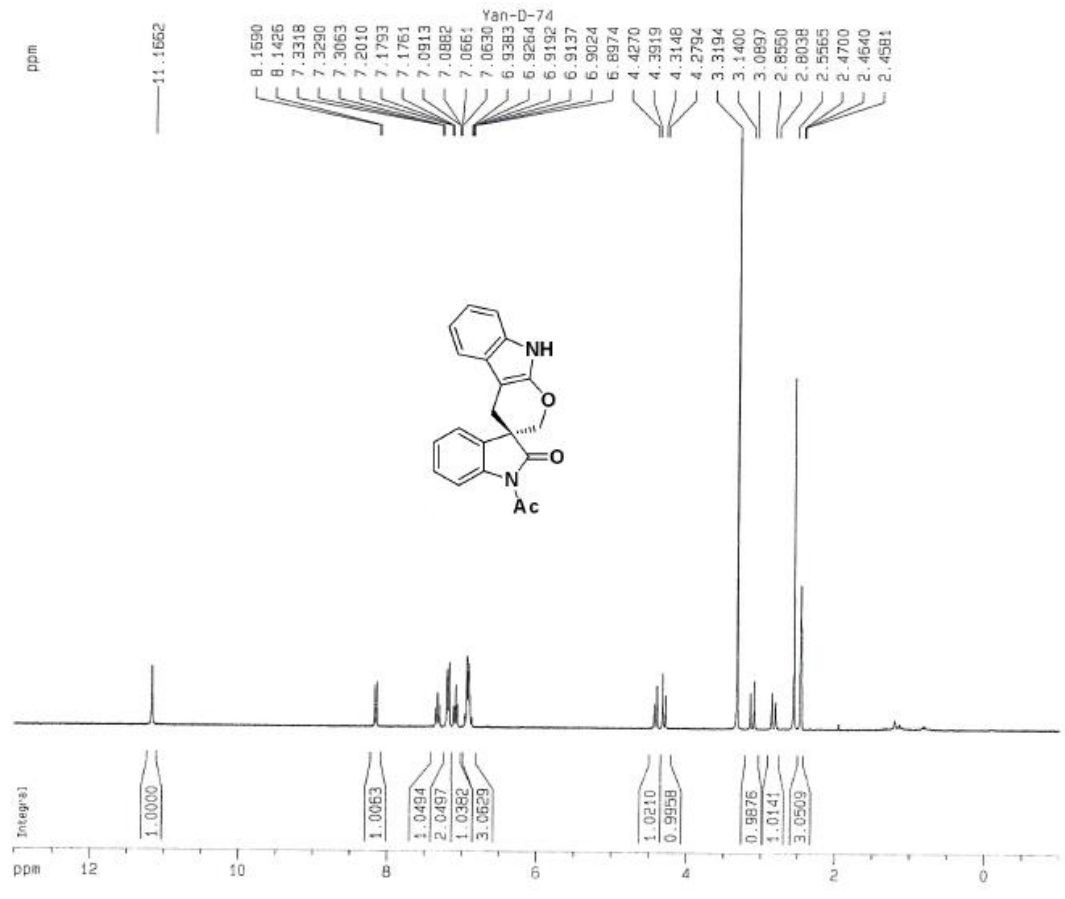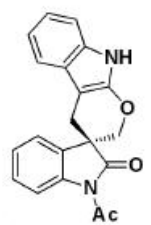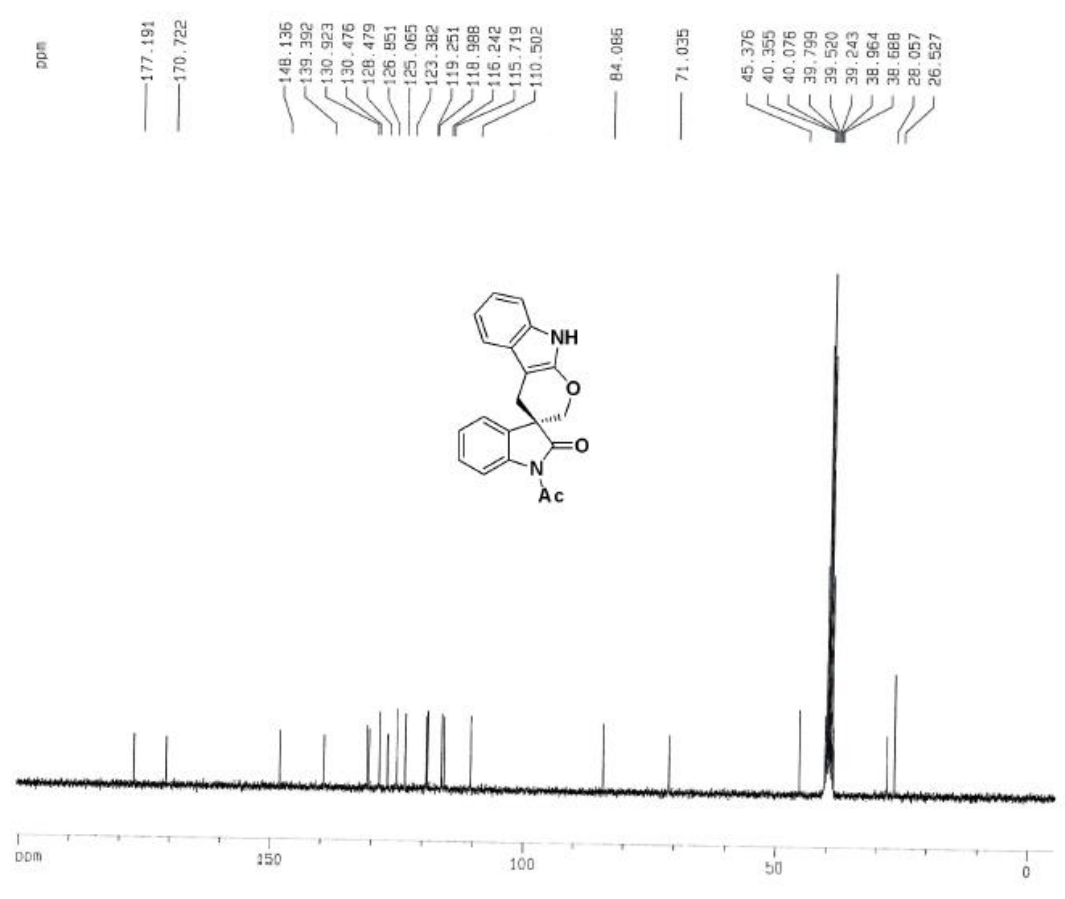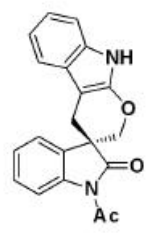

## 2p: Racemic

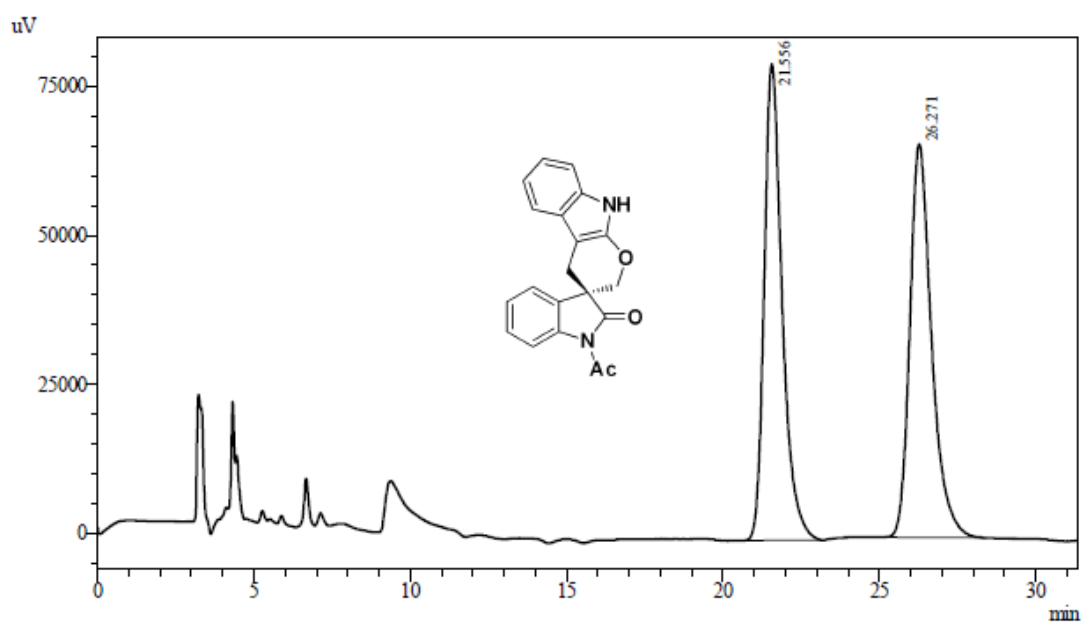

1 Det.A Ch1 / 254nm

Detector A Ch1 254nm

| Peak# | Ret. Time | Area    | Height | Area %  | Height % |
|-------|-----------|---------|--------|---------|----------|
| 1     | 21.556    | 3199847 | 79897  | 50.025  | 54.776   |
| 2     | 26.271    | 3196685 | 65963  | 49.975  | 45.224   |
| Total |           | 6396532 | 145859 | 100.000 | 100.000  |

## 2p: Chiral

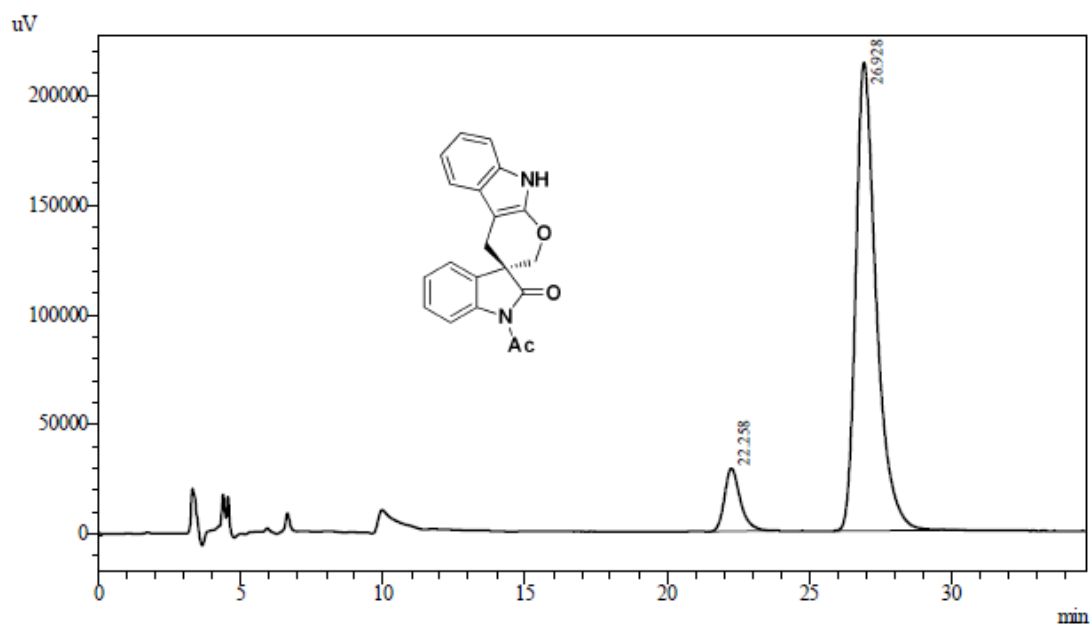

1 Det.A Ch1 / 254nm

Detector A Ch1 254nm

| Peak# | Ret. Time | Area     | Height | Area %  | Height % |
|-------|-----------|----------|--------|---------|----------|
| 1     | 22.258    | 1117662  | 28657  | 9.450   | 11.829   |
| 2     | 26.928    | 10709754 | 213613 | 90.550  | 88.171   |
| Total |           | 11827415 | 242270 | 100.000 | 100.000  |

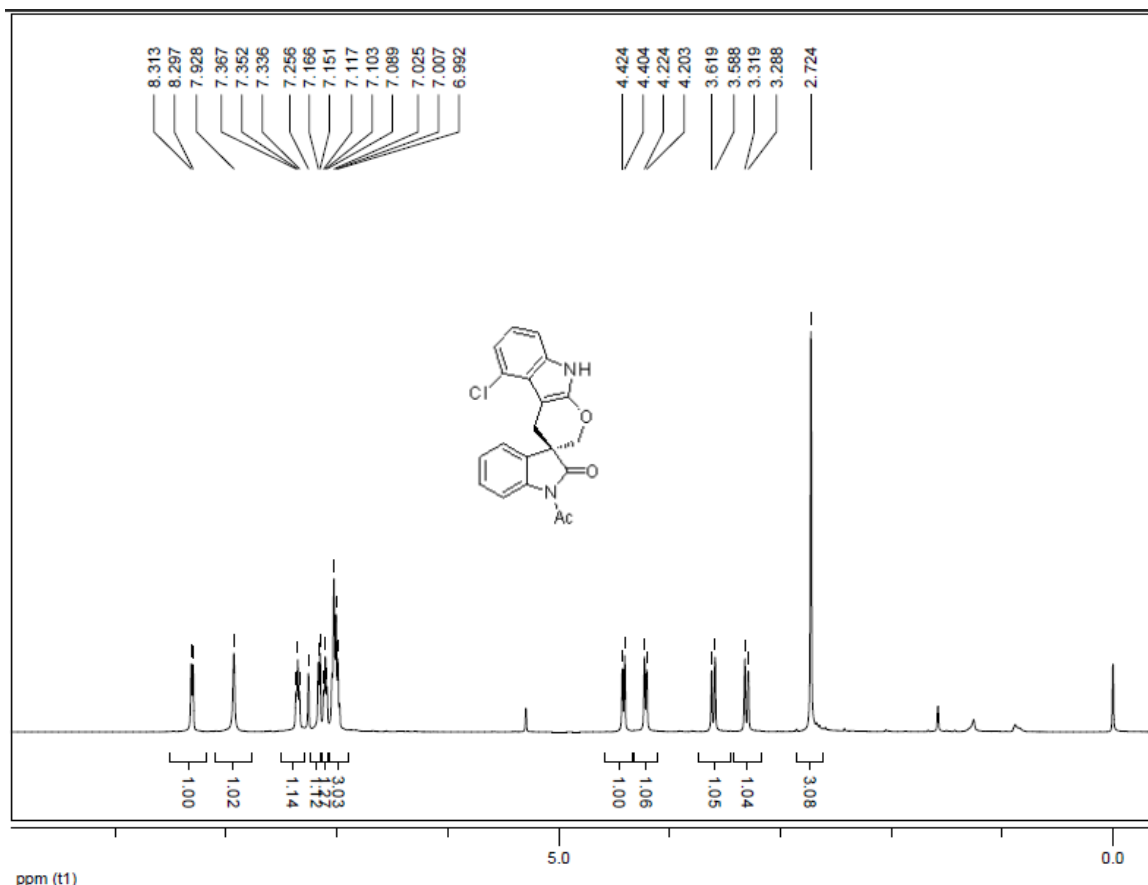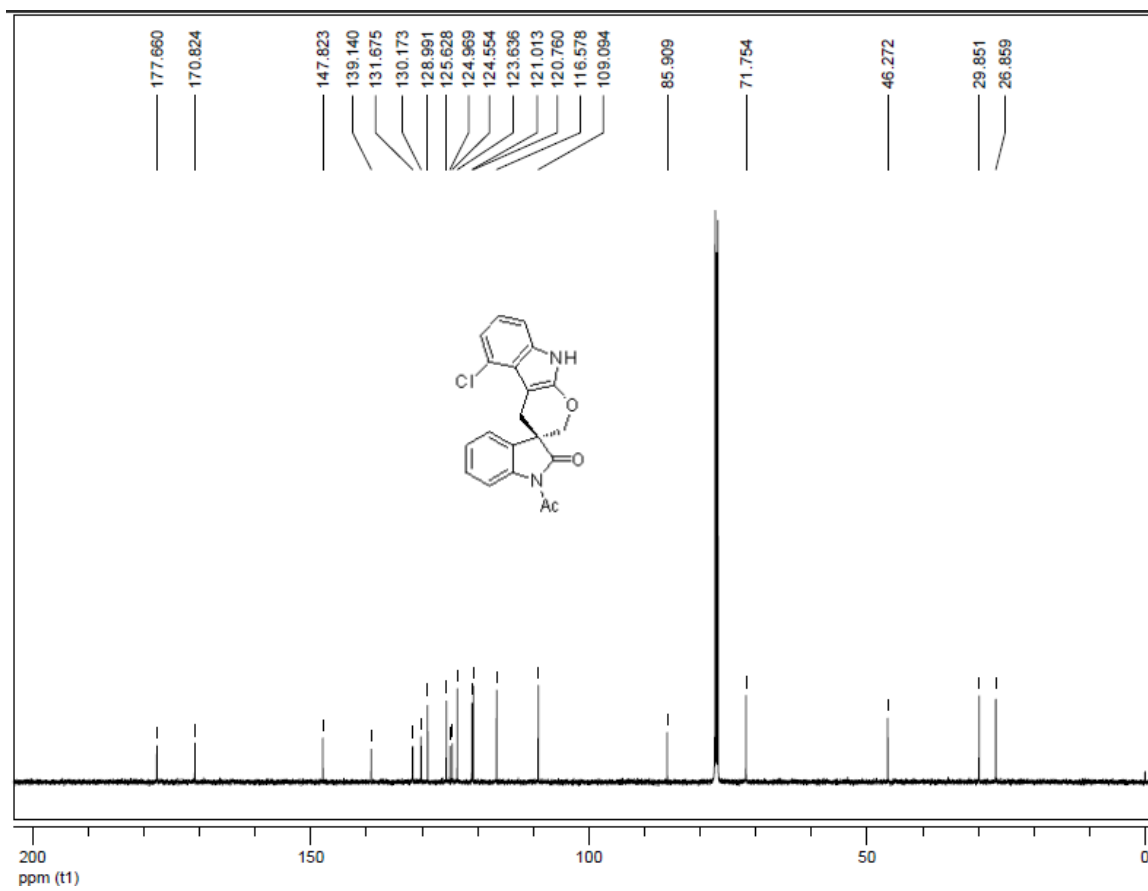

**2q: Racemic**

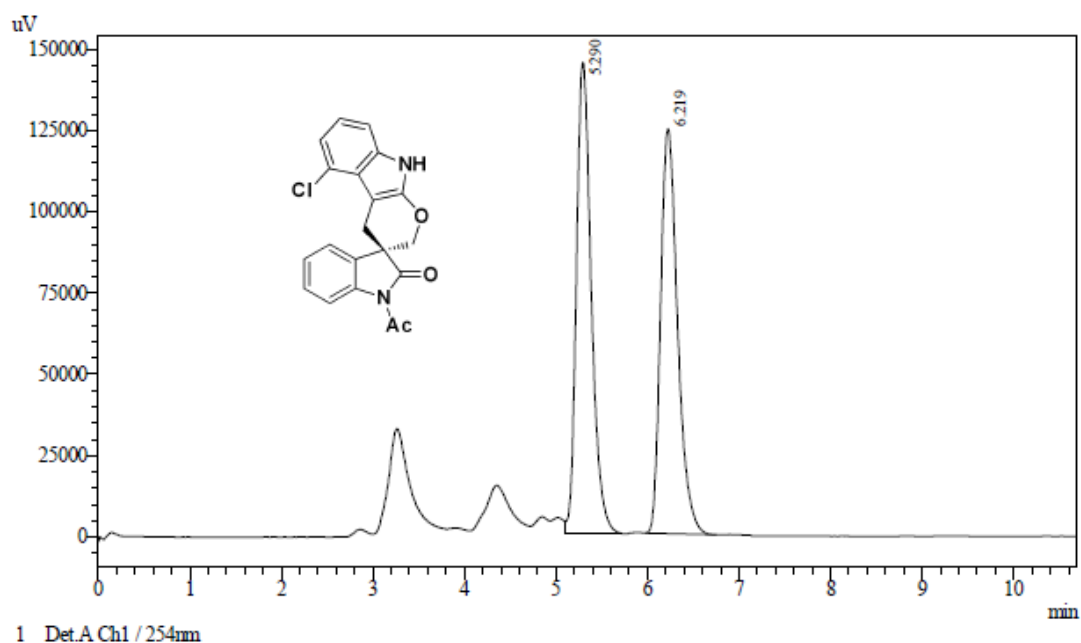

Detector A Ch1 254nm

| Peak# | Ret. Time | Area    | Height | Area %  | Height % |
|-------|-----------|---------|--------|---------|----------|
| 1     | 5.290     | 1629156 | 144821 | 50.379  | 53.761   |
| 2     | 6.219     | 1604623 | 124557 | 49.621  | 46.239   |
| Total |           | 3233779 | 269378 | 100.000 | 100.000  |

**2q: Chiral**

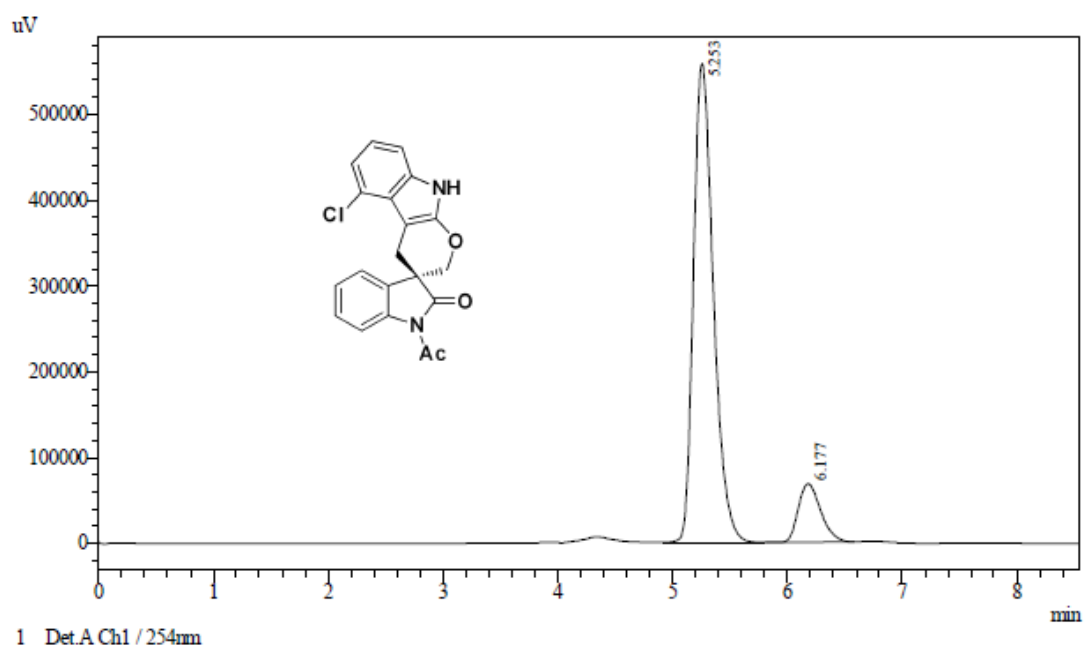

Detector A Ch1 254nm

| Peak# | Ret. Time | Area    | Height | Area %  | Height % |
|-------|-----------|---------|--------|---------|----------|
| 1     | 5.253     | 6754407 | 558641 | 87.871  | 89.106   |
| 2     | 6.177     | 932344  | 68301  | 12.129  | 10.894   |
| Total |           | 7686750 | 626942 | 100.000 | 100.000  |

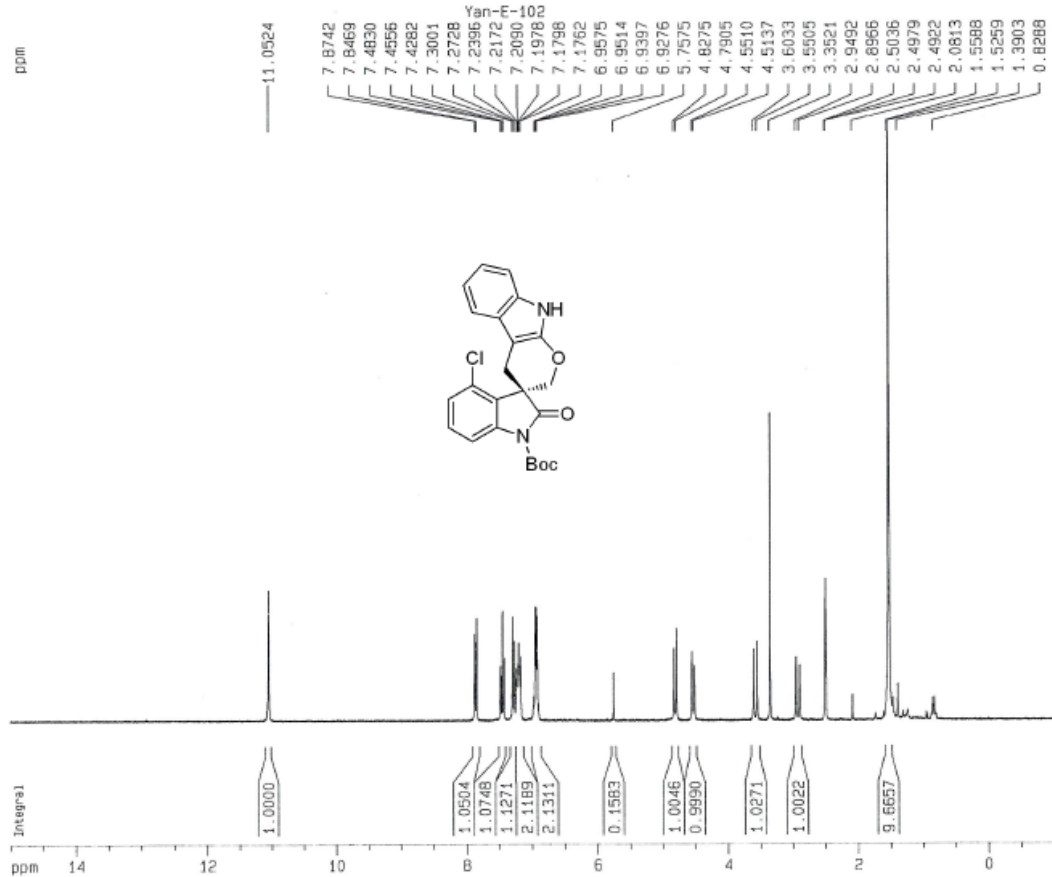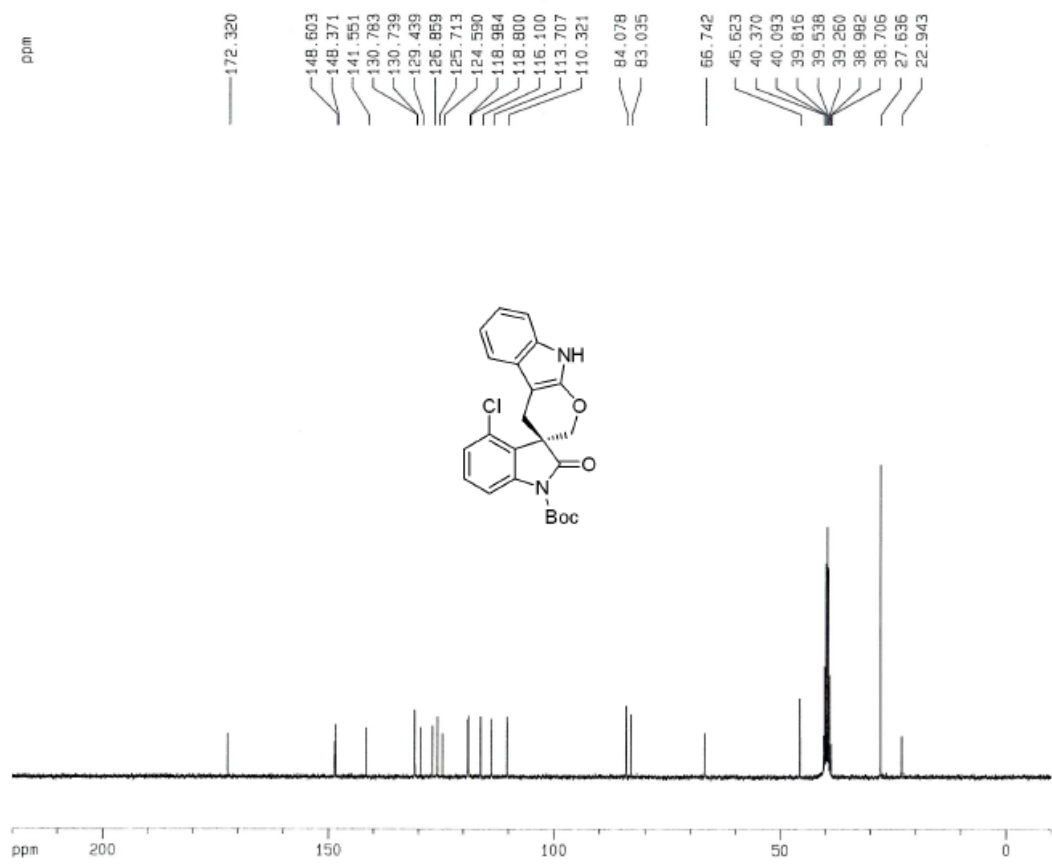

**2r: Racemic**

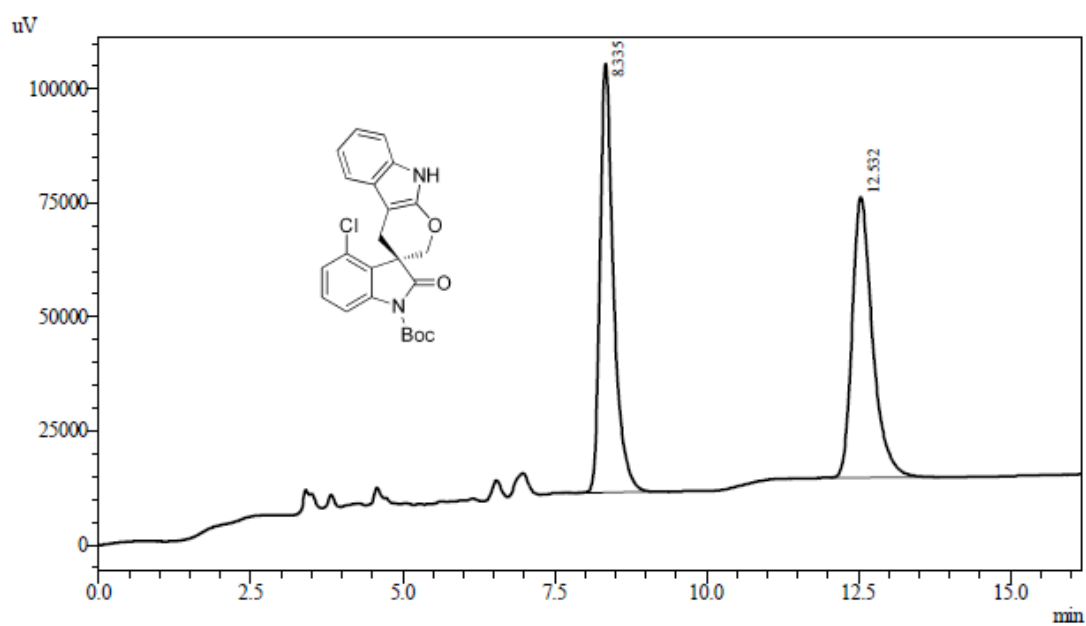

1 Det.A Ch1 / 254nm

Detector A Ch1 254nm

| Peak# | Ret. Time | Area    | Height | Area %  | Height % |
|-------|-----------|---------|--------|---------|----------|
| 1     | 8.335     | 1459981 | 94001  | 50.315  | 60.448   |
| 2     | 12.532    | 1441692 | 61505  | 49.685  | 39.552   |
| Total |           | 2901673 | 155506 | 100.000 | 100.000  |

**2r: Chiral**

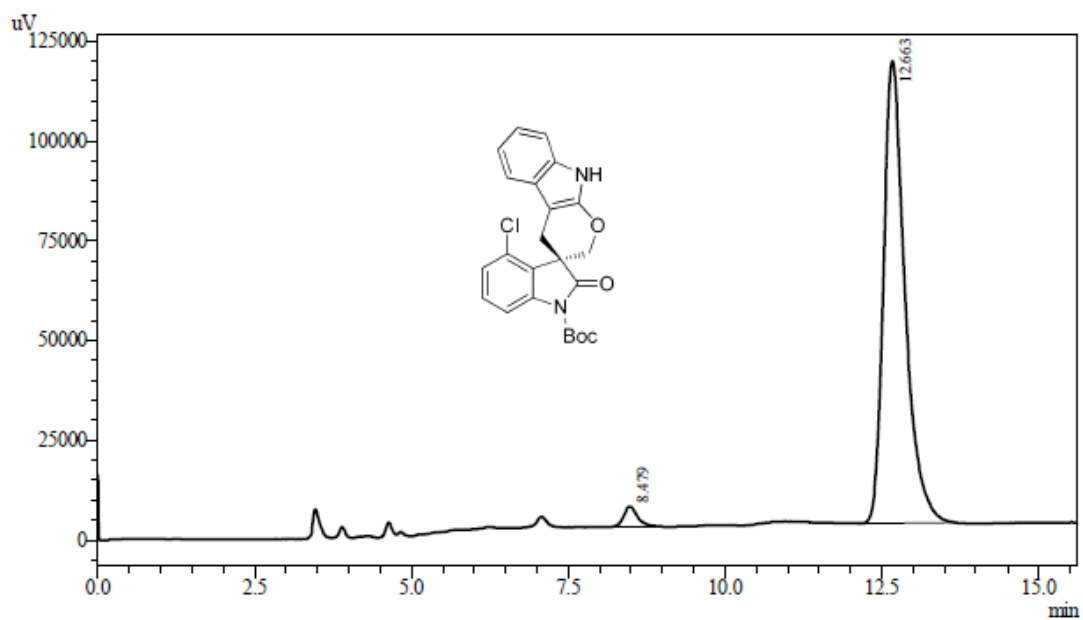

1 Det.A Ch1 / 254nm

Detector A Ch1 254nm

| Peak# | Ret. Time | Area    | Height | Area %  | Height % |
|-------|-----------|---------|--------|---------|----------|
| 1     | 8.479     | 79715   | 5101   | 2.815   | 4.218    |
| 2     | 12.663    | 2751807 | 115822 | 97.185  | 95.782   |
| Total |           | 2831522 | 120923 | 100.000 | 100.000  |



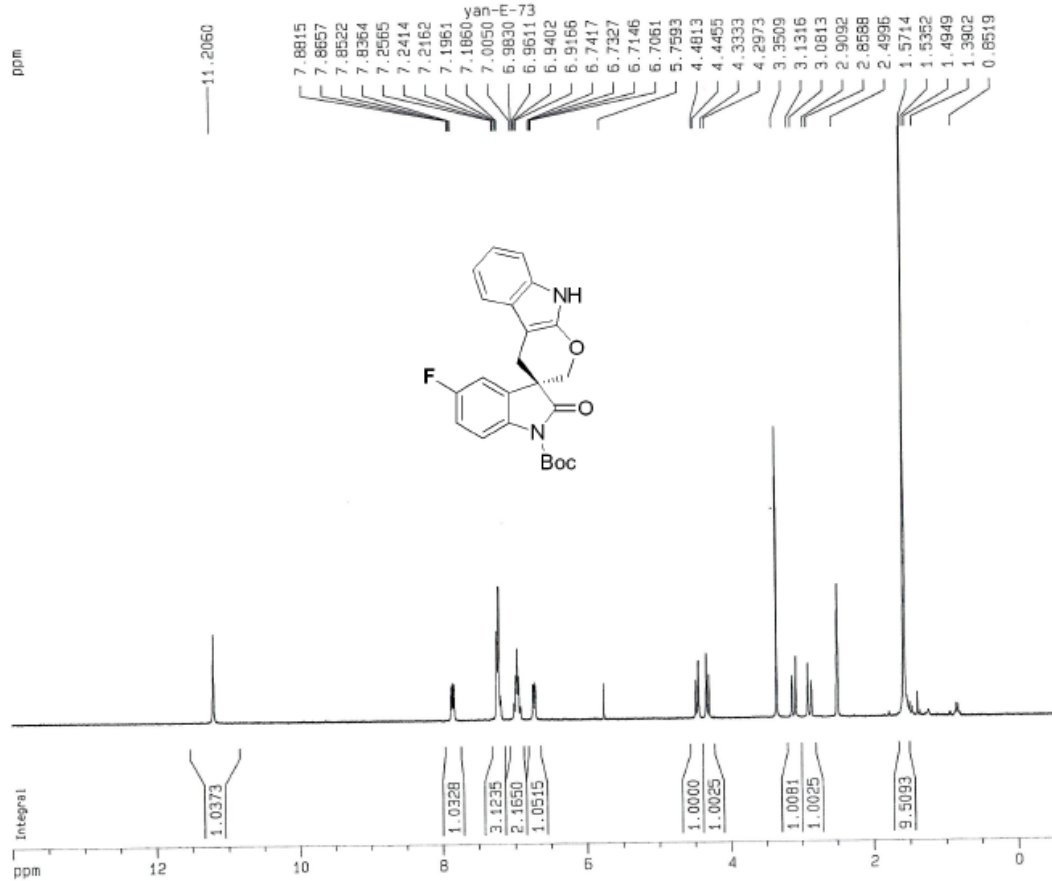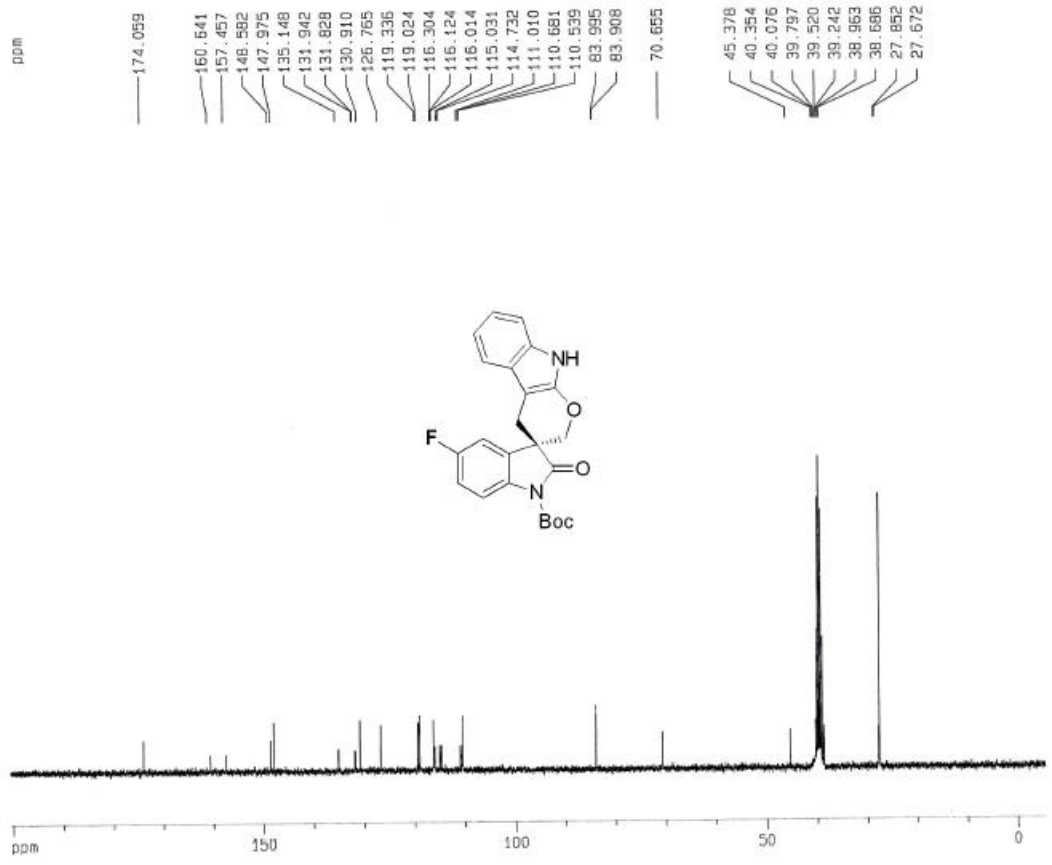

**2s: Racemic**

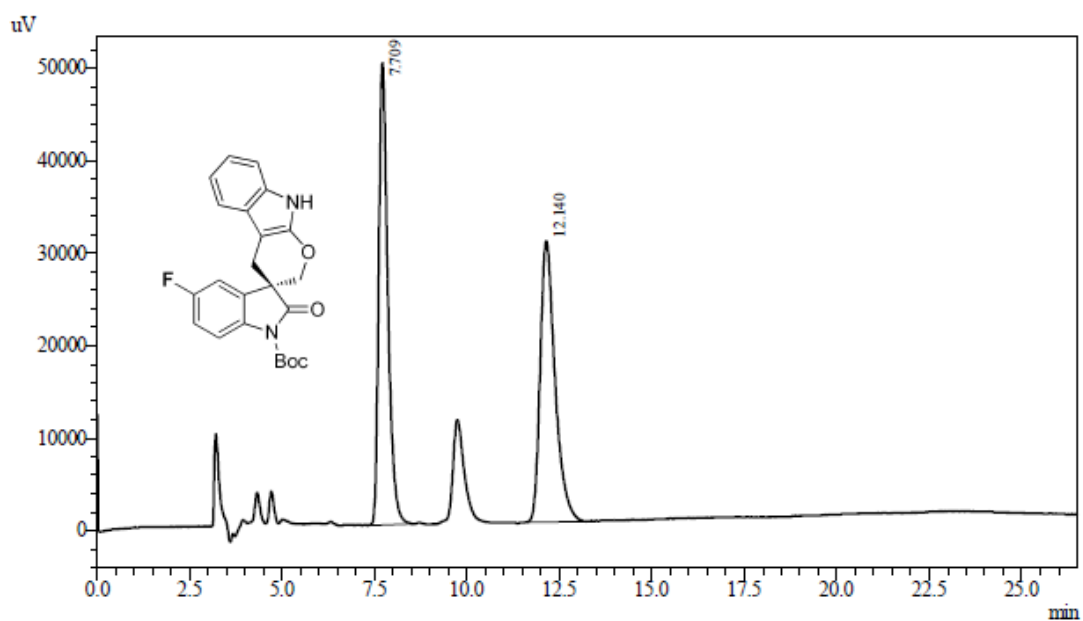

1 Det.A Ch1 / 254nm

Detector A Ch1 254nm

| Peak# | Ret. Time | Area    | Height | Area %  | Height % |
|-------|-----------|---------|--------|---------|----------|
| 1     | 7.709     | 853343  | 49944  | 50.088  | 62.165   |
| 2     | 12.140    | 850348  | 30397  | 49.912  | 37.835   |
| Total |           | 1703691 | 80341  | 100.000 | 100.000  |

**2s: Chiral**

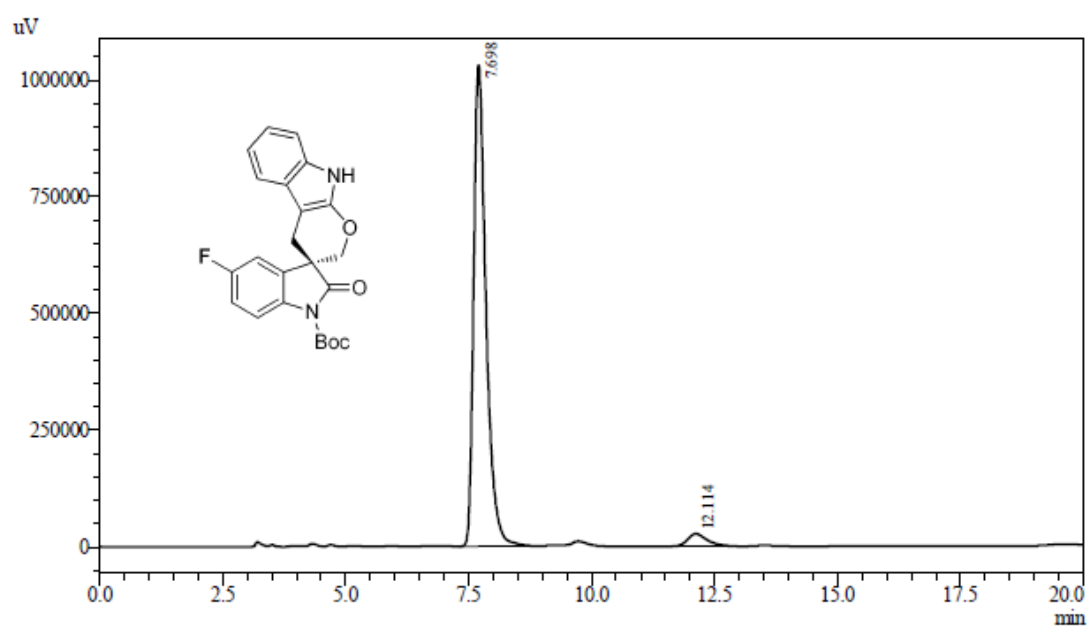

1 Det.A Ch1 / 254nm

Detector A Ch1 254nm

| Peak# | Ret. Time | Area     | Height  | Area %  | Height % |
|-------|-----------|----------|---------|---------|----------|
| 1     | 7.698     | 17886645 | 1029860 | 95.922  | 97.470   |
| 2     | 12.114    | 760448   | 26732   | 4.078   | 2.530    |
| Total |           | 18647093 | 1056591 | 100.000 | 100.000  |

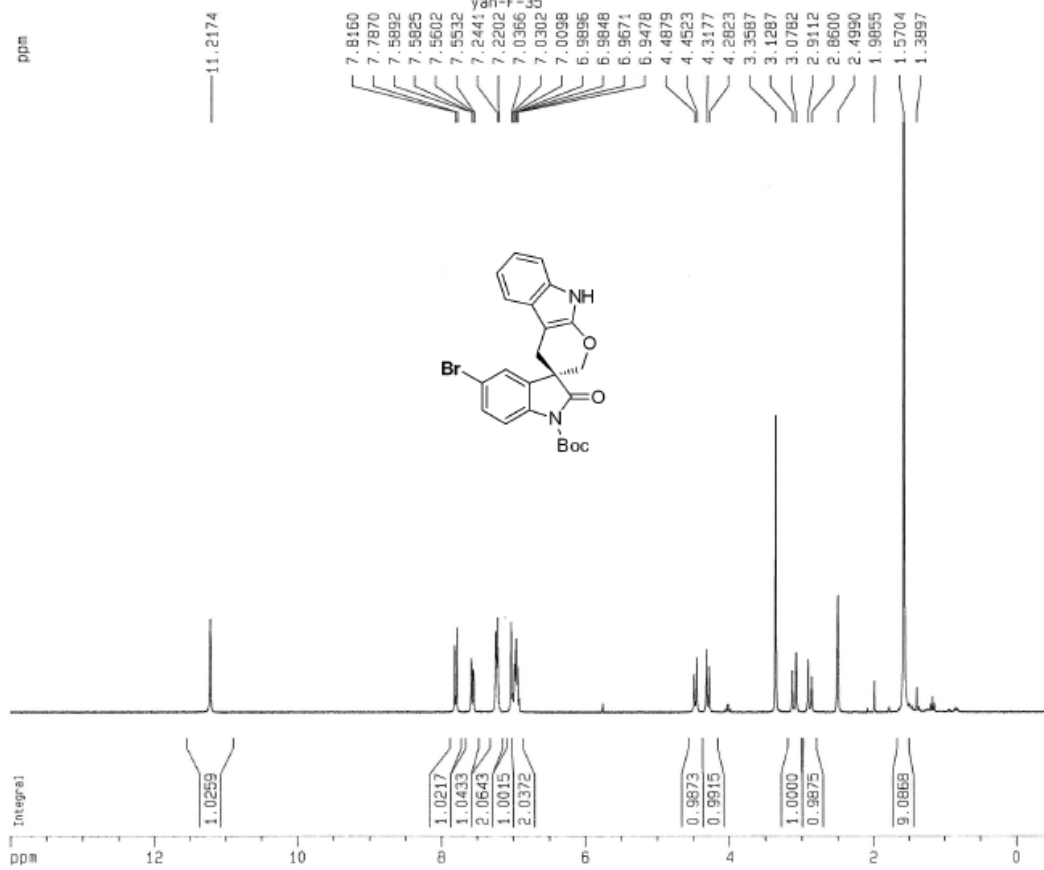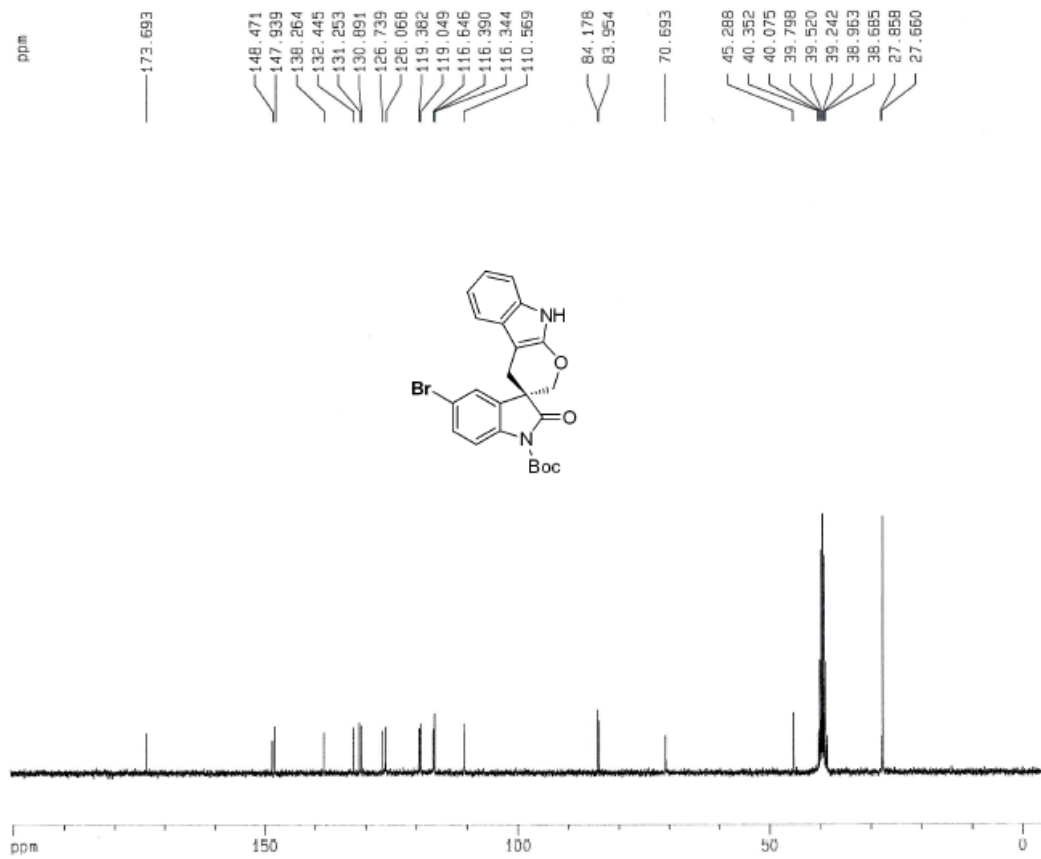

## 2t: Racemic

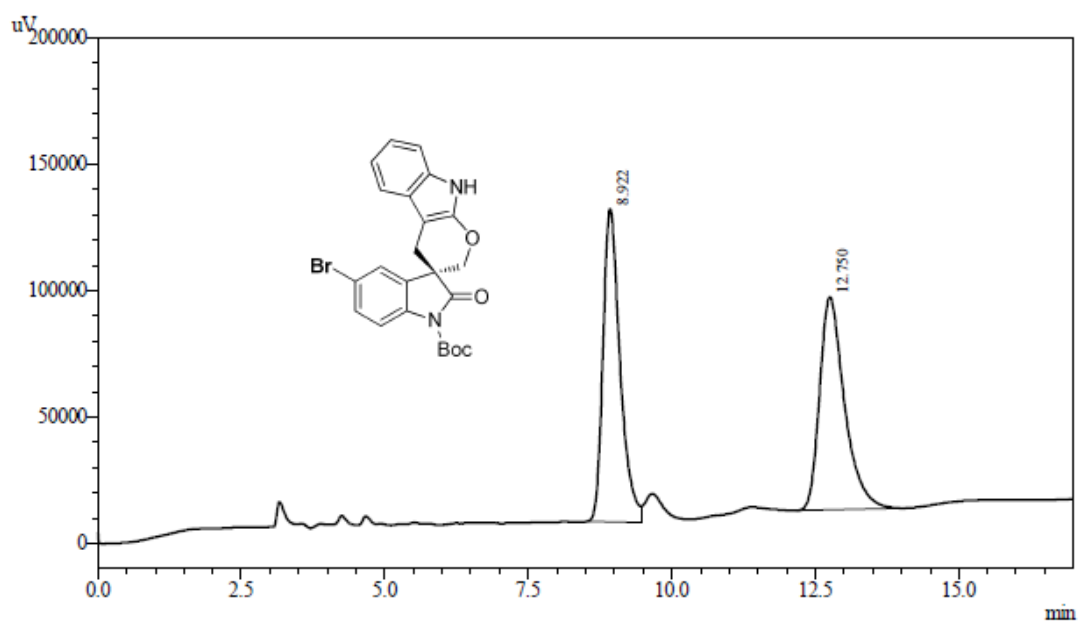

1 Det.A Ch1 / 254nm

Detector A Ch1 254nm

| Peak# | Ret. Time | Area    | Height | Area %  | Height % |
|-------|-----------|---------|--------|---------|----------|
| 1     | 8.922     | 2563643 | 123684 | 50.312  | 59.564   |
| 2     | 12.750    | 2531820 | 83966  | 49.688  | 40.436   |
| Total |           | 5095463 | 207650 | 100.000 | 100.000  |

## 2t: Chiral

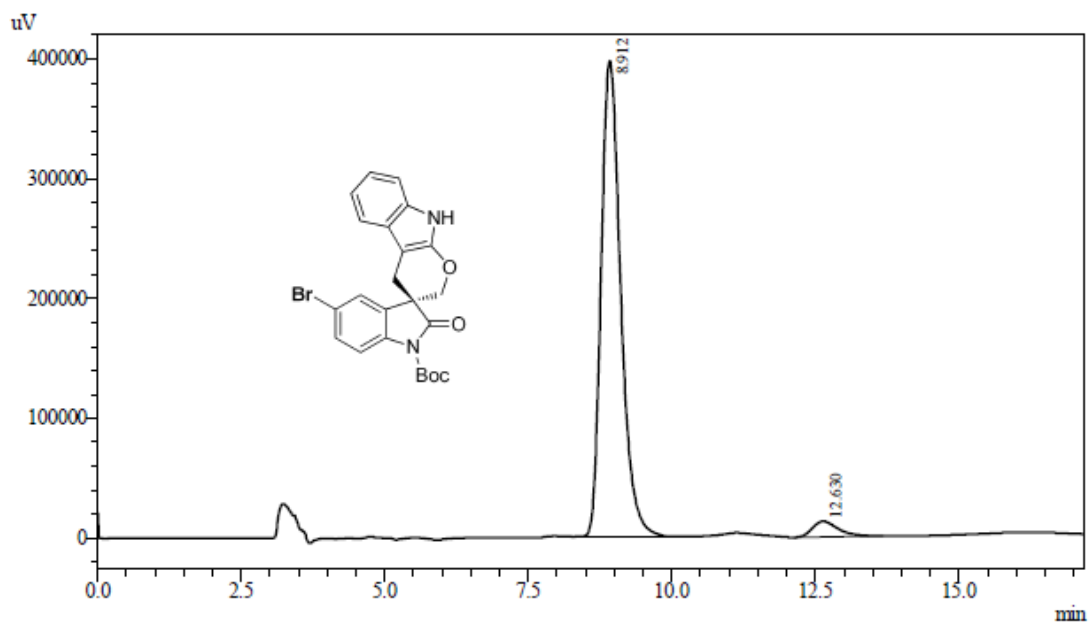

1 Det.A Ch1 / 254nm

Detector A Ch1 254nm

| Peak# | Ret. Time | Area    | Height | Area %  | Height % |
|-------|-----------|---------|--------|---------|----------|
| 1     | 8.912     | 9410314 | 397038 | 95.819  | 96.836   |
| 2     | 12.630    | 410588  | 12974  | 4.181   | 3.164    |
| Total |           | 9820902 | 410012 | 100.000 | 100.000  |

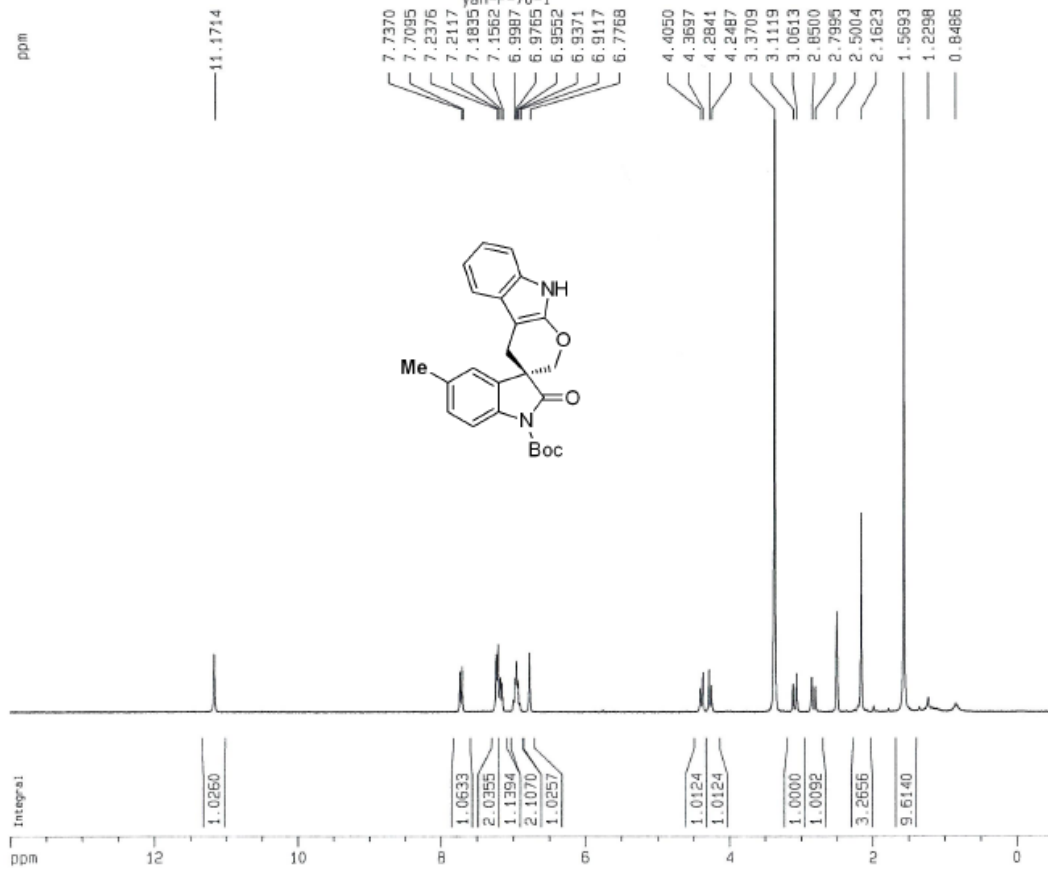

## 2u: Racemic

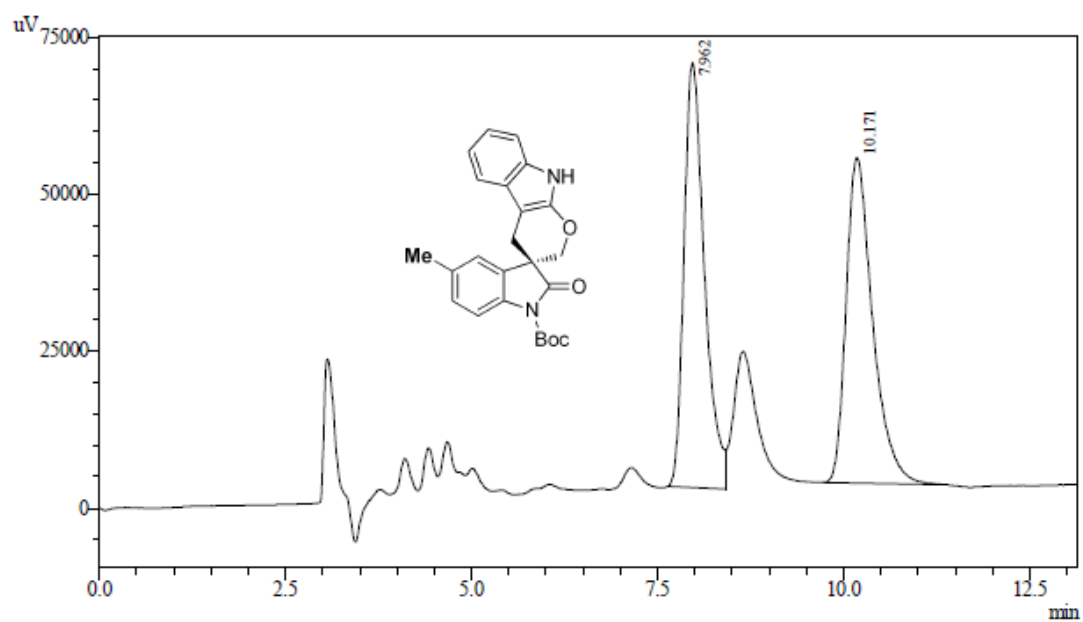

Detector A Ch1 254nm

| Peak# | Ret. Time | Area    | Height | Area %  | Height % |
|-------|-----------|---------|--------|---------|----------|
| 1     | 7.962     | 1296102 | 67681  | 50.161  | 56.606   |
| 2     | 10.171    | 1287764 | 51884  | 49.839  | 43.394   |
| Total |           | 2583866 | 119565 | 100.000 | 100.000  |

## 2u: Chiral

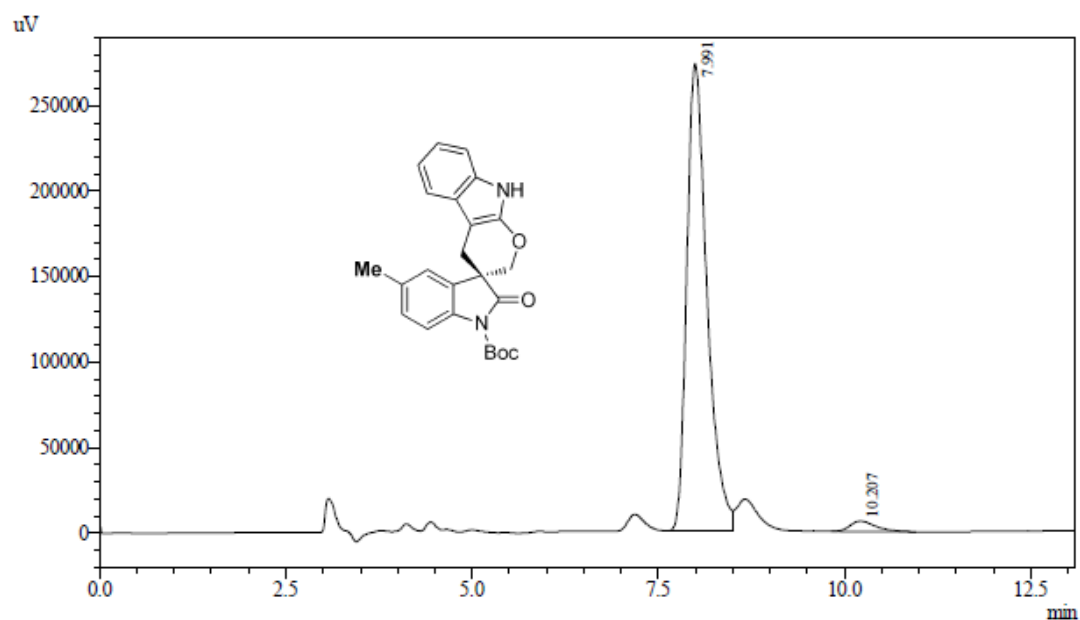

Detector A Ch1 254nm

| Peak# | Ret. Time | Area    | Height | Area %  | Height % |
|-------|-----------|---------|--------|---------|----------|
| 1     | 7.991     | 5173853 | 273210 | 97.226  | 97.813   |
| 2     | 10.207    | 147595  | 6109   | 2.774   | 2.187    |
| Total |           | 5321449 | 279319 | 100.000 | 100.000  |

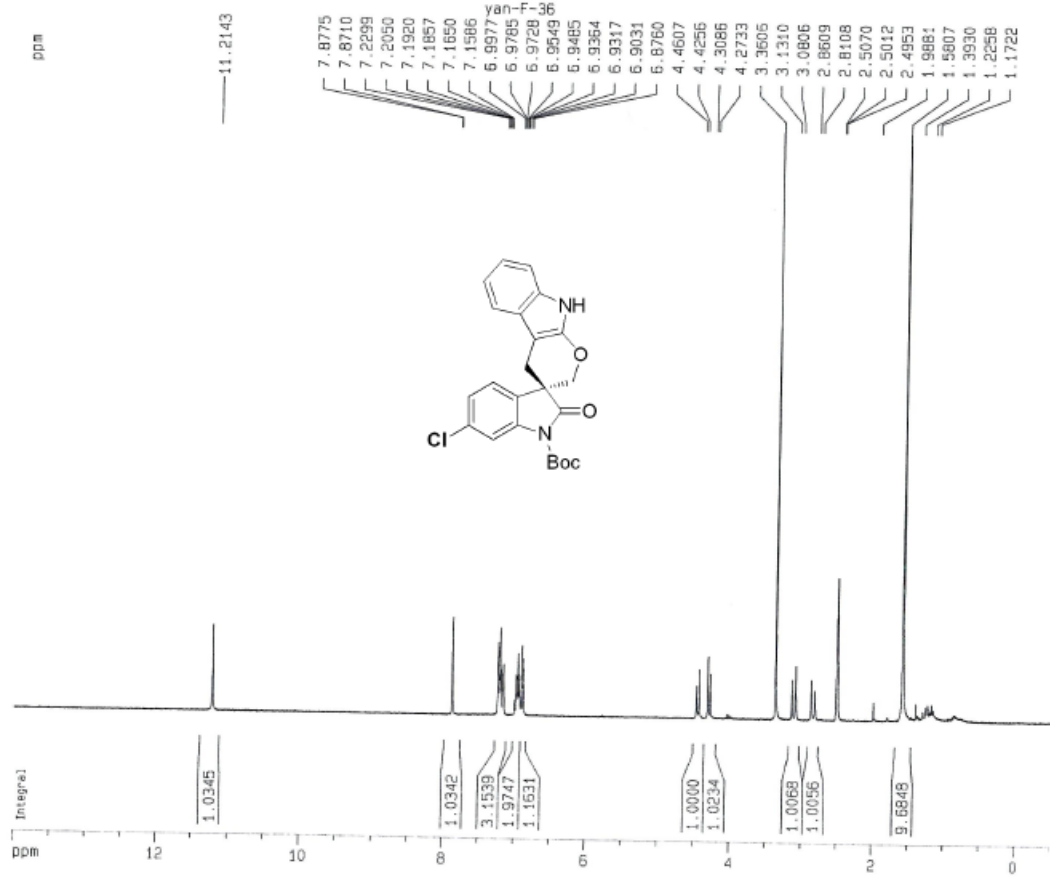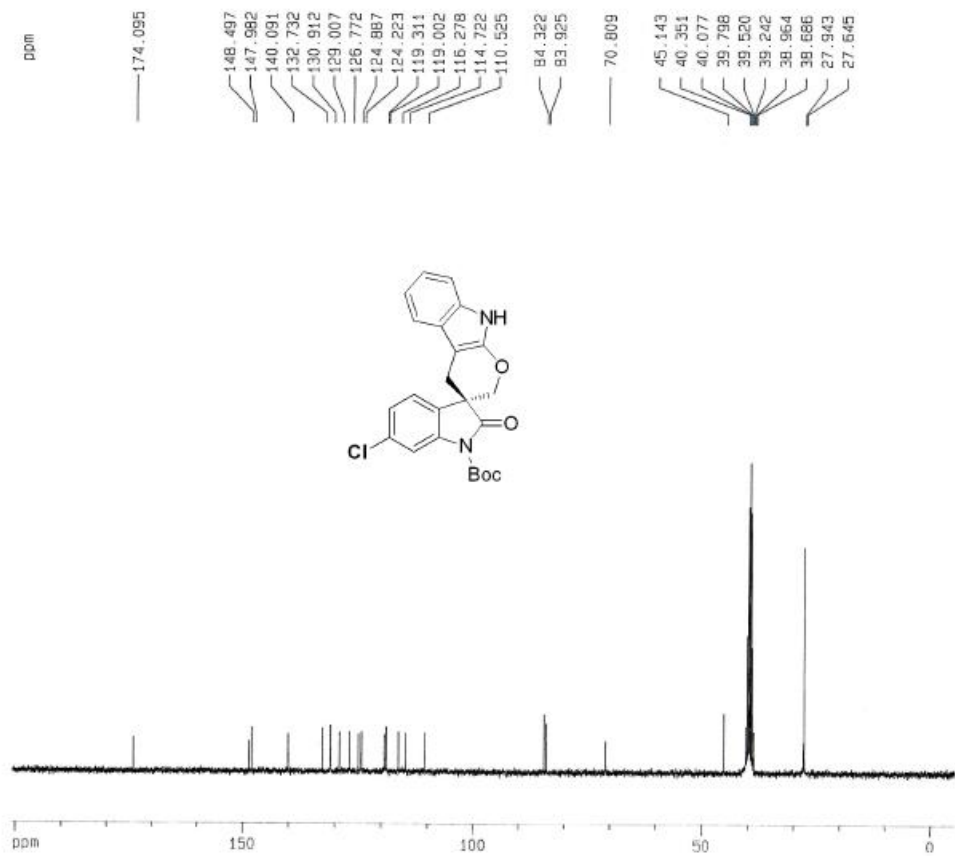

**2v: Racemic**

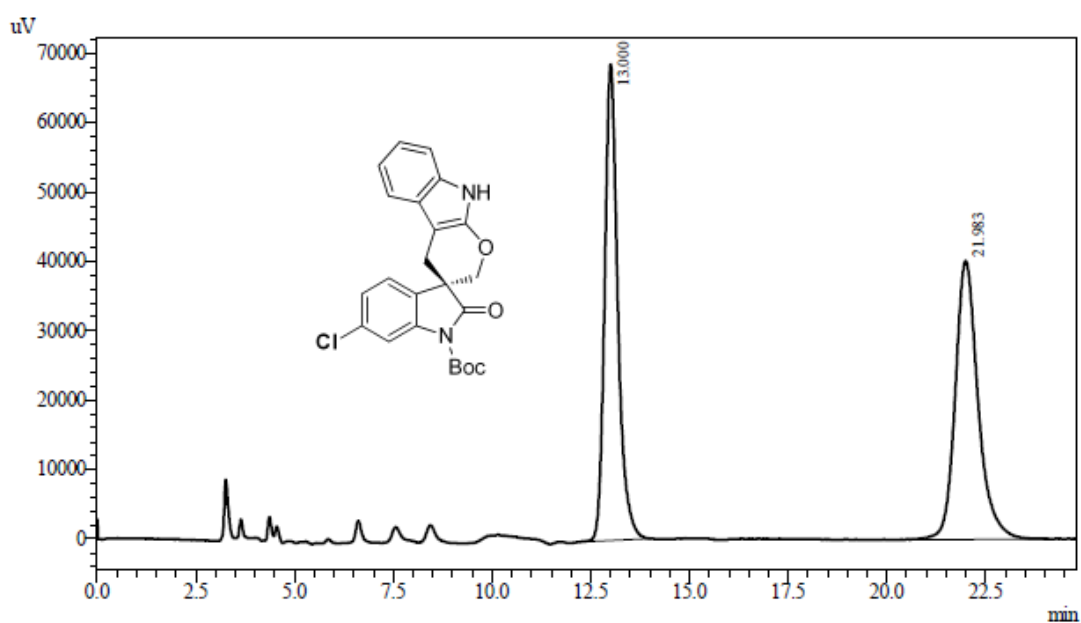

1 Det.A Ch1 /254nm

Detector A Ch1 254nm

| Peak# | Ret. Time | Area    | Height | Area %  | Height % |
|-------|-----------|---------|--------|---------|----------|
| 1     | 13.000    | 1588612 | 68633  | 49.593  | 63.123   |
| 2     | 21.983    | 1614674 | 40096  | 50.407  | 36.877   |
| Total |           | 3203287 | 108729 | 100.000 | 100.000  |

**2v: Chiral**

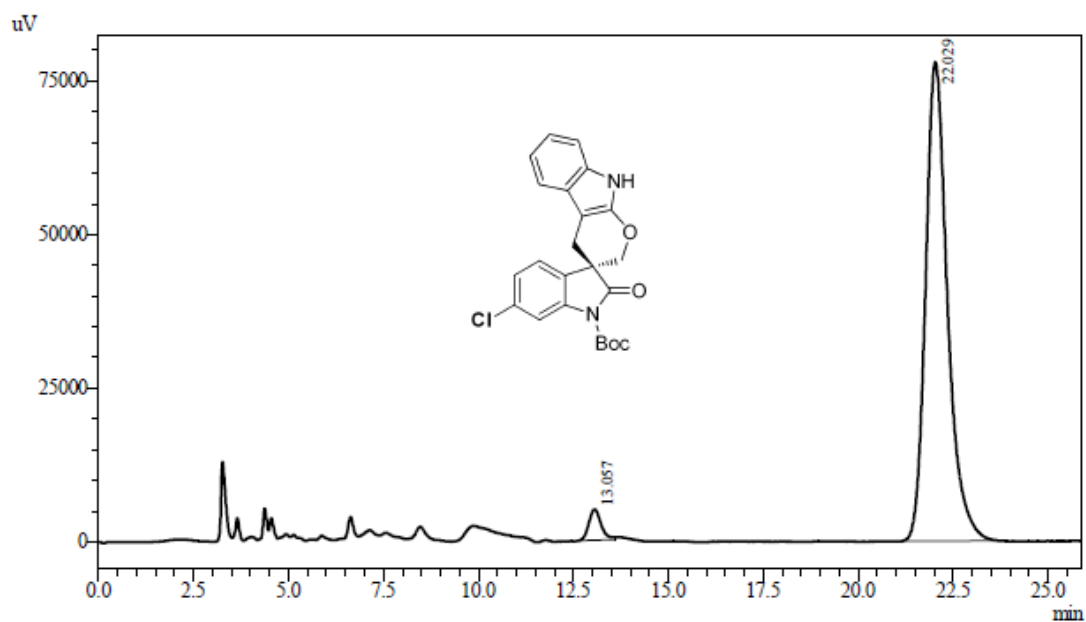

1 Det.A Ch1 /254nm

Detector A Ch1 254nm

| Peak# | Ret. Time | Area    | Height | Area %  | Height % |
|-------|-----------|---------|--------|---------|----------|
| 1     | 13.057    | 113758  | 5074   | 3.514   | 6.112    |
| 2     | 22.029    | 3123665 | 77937  | 96.486  | 93.888   |
| Total |           | 3237423 | 83011  | 100.000 | 100.000  |



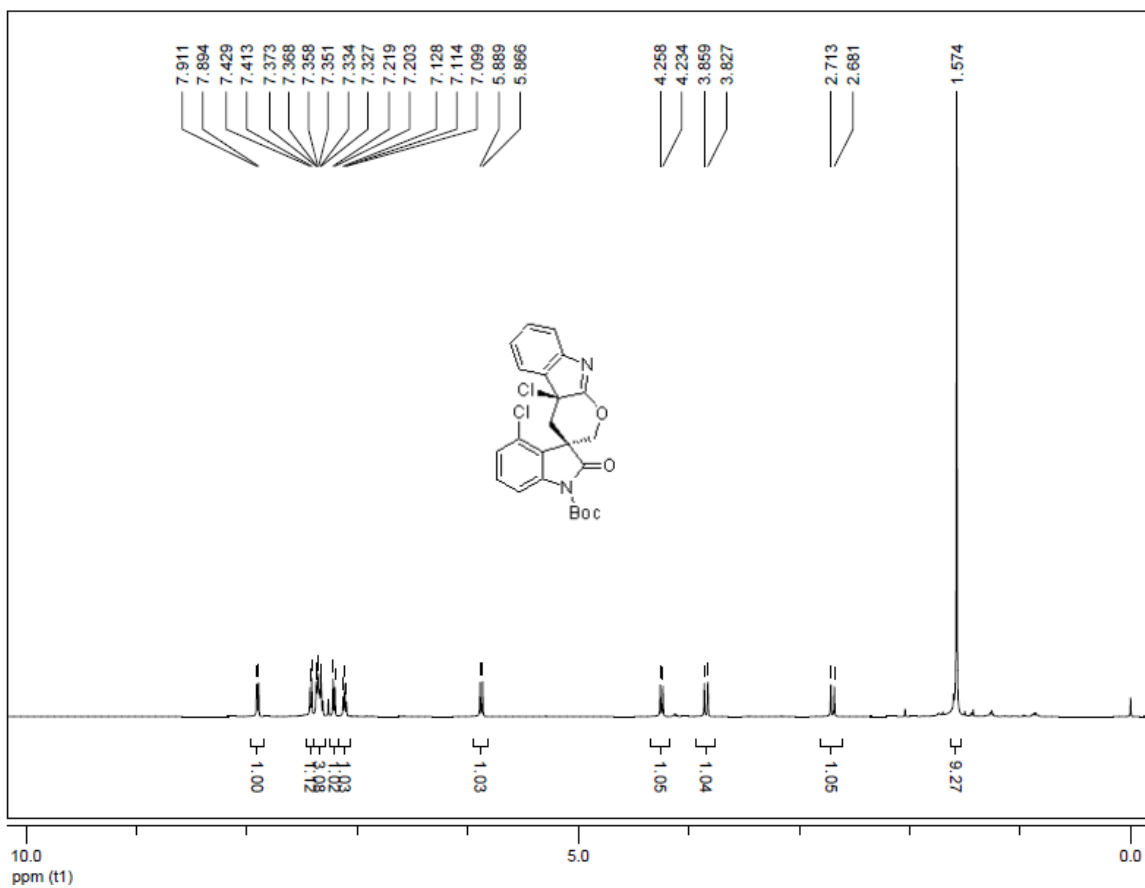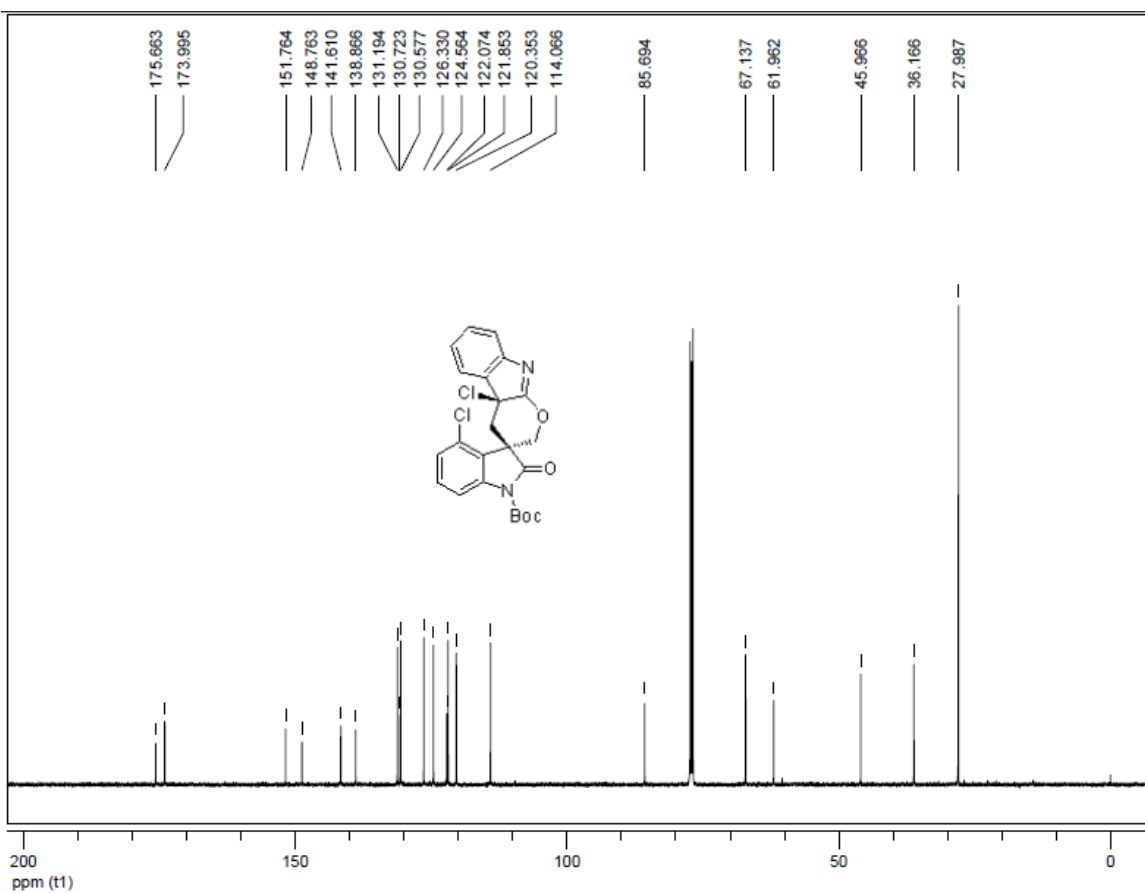

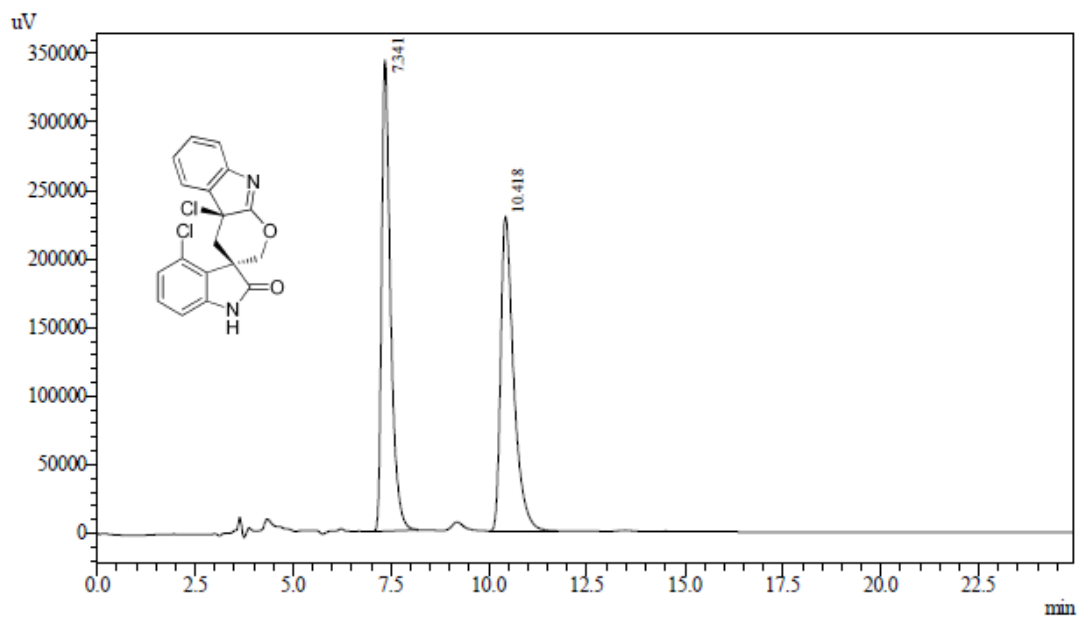

1 Det.A Ch1 / 254nm

Detector A Ch1 254nm

| Peak# | Ret. Time | Area     | Height | Area %  | Height % |
|-------|-----------|----------|--------|---------|----------|
| 1     | 7.341     | 5425213  | 343513 | 50.624  | 59.960   |
| 2     | 10.418    | 5291504  | 229395 | 49.376  | 40.040   |
| Total |           | 10716717 | 572908 | 100.000 | 100.000  |

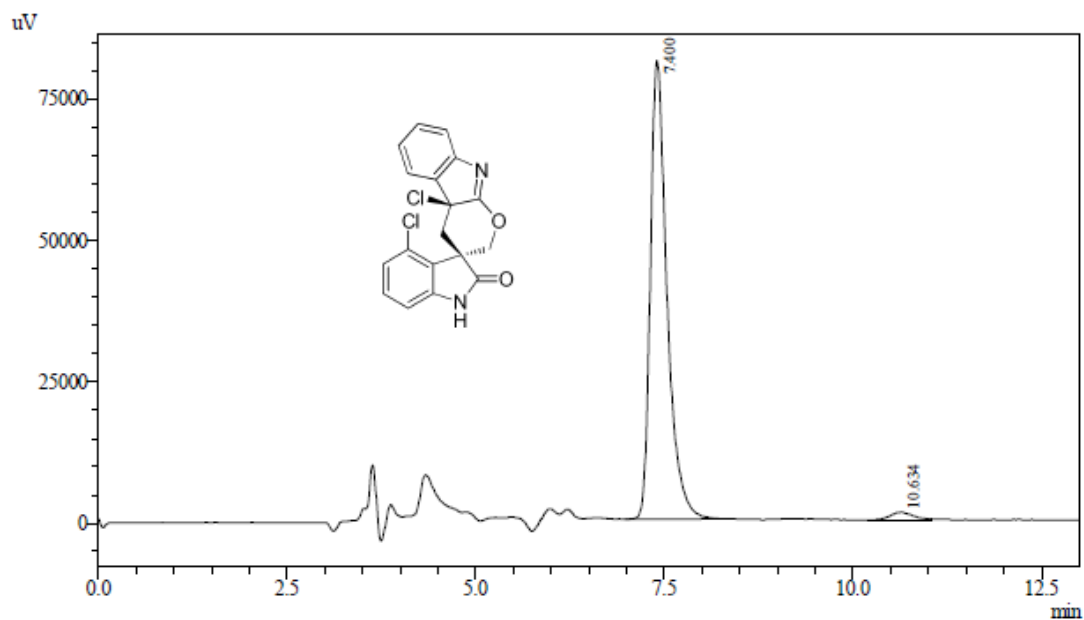

1 Det.A Ch1 / 254nm

Detector A Ch1 254nm

| Peak# | Ret. Time | Area    | Height | Area %  | Height % |
|-------|-----------|---------|--------|---------|----------|
| 1     | 7.400     | 1252039 | 81166  | 97.657  | 98.361   |
| 2     | 10.634    | 30041   | 1352   | 2.343   | 1.639    |
| Total |           | 1282079 | 82519  | 100.000 | 100.000  |

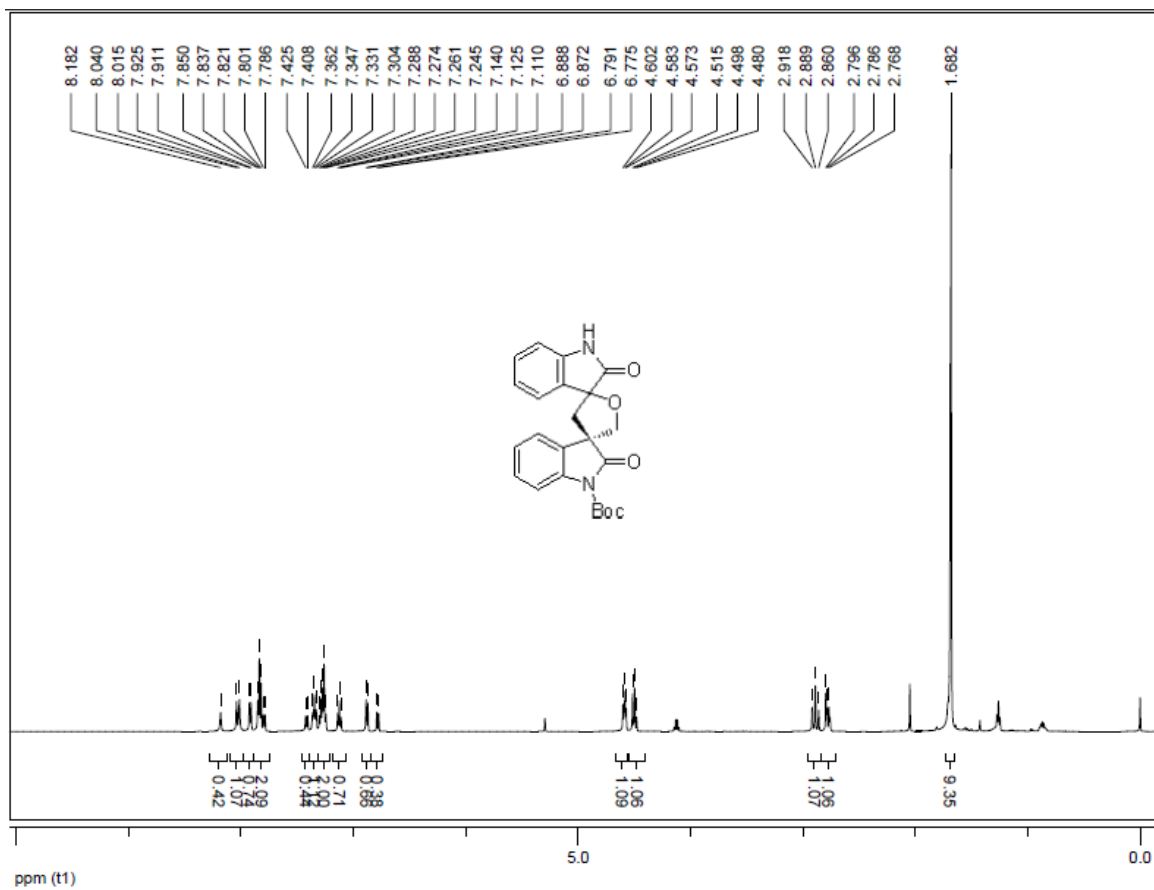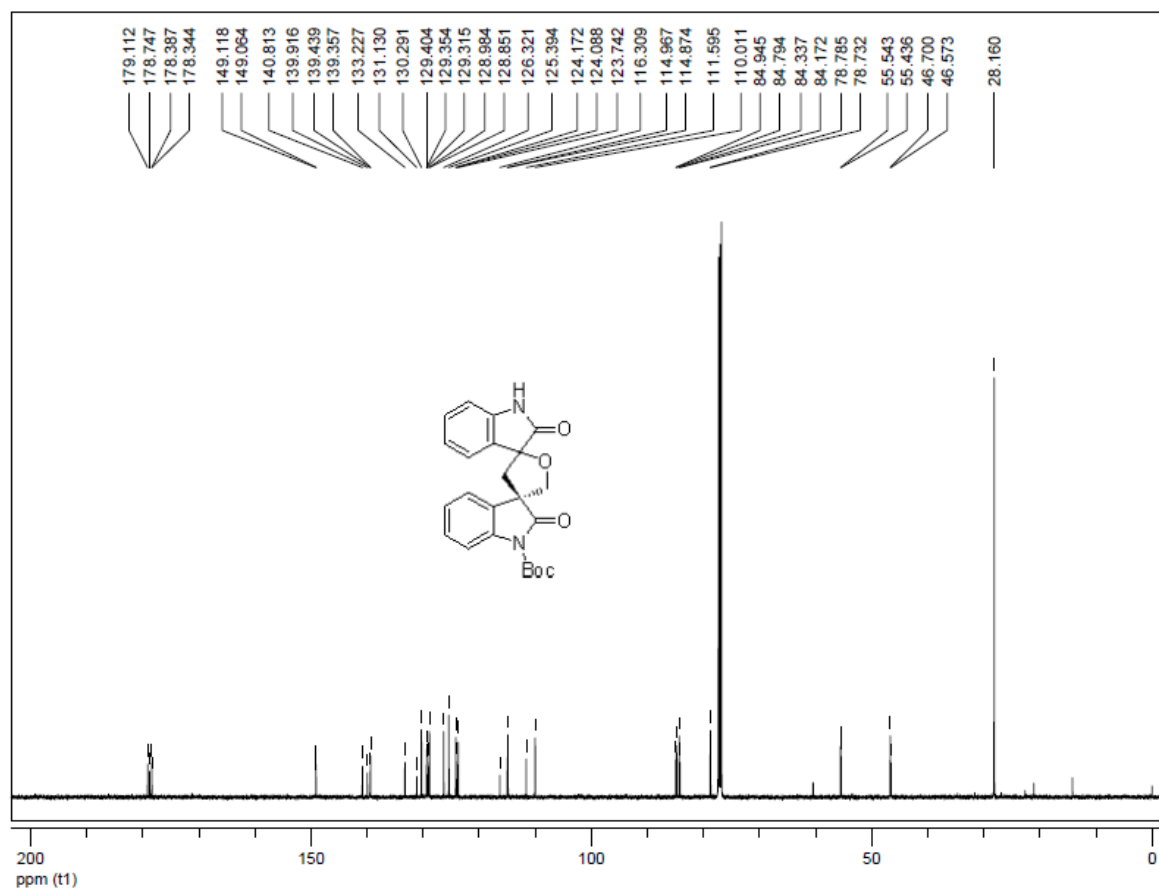

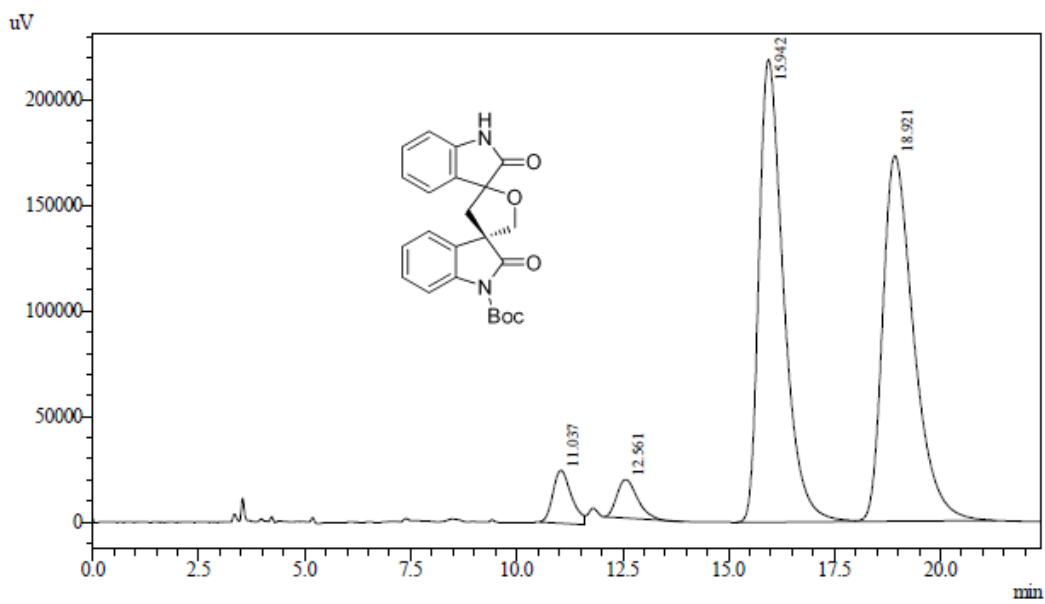

Detector A Ch1 254nm

| Peak# | Ret. Time | Area     | Height | Area %  | Height % |
|-------|-----------|----------|--------|---------|----------|
| 1     | 11.037    | 768259   | 24996  | 4.038   | 5.739    |
| 2     | 12.561    | 617506   | 18309  | 3.246   | 4.204    |
| 3     | 15.942    | 8848889  | 219183 | 46.515  | 50.323   |
| 4     | 18.921    | 8789014  | 173067 | 46.200  | 39.735   |
| Total |           | 19023668 | 435556 | 100.000 | 100.000  |

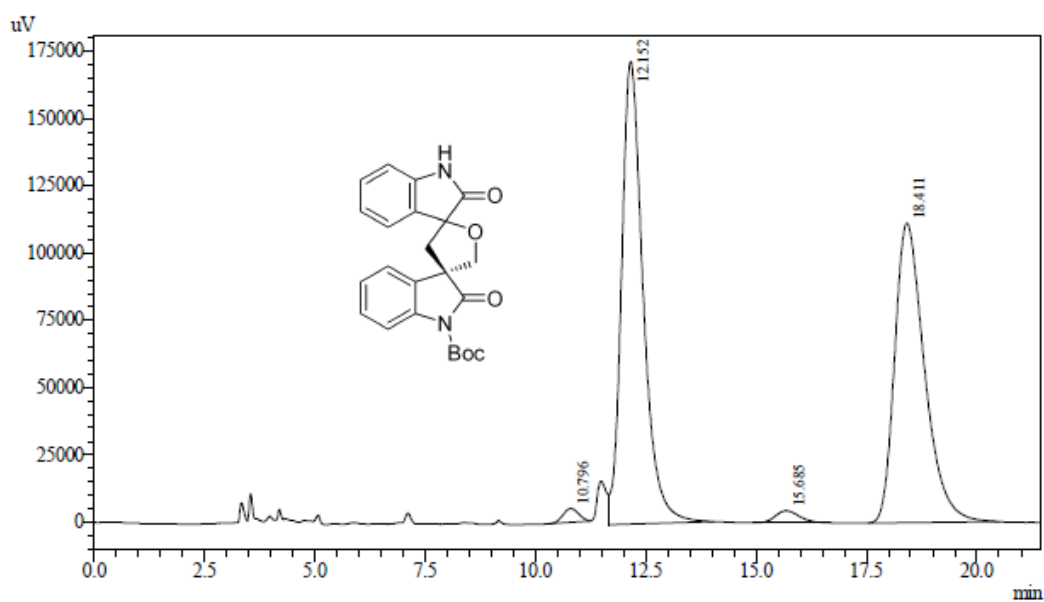

Detector A Ch1 254nm

| Peak# | Ret. Time | Area     | Height | Area %  | Height % |
|-------|-----------|----------|--------|---------|----------|
| 1     | 10.796    | 126404   | 5143   | 1.110   | 1.756    |
| 2     | 12.152    | 5855419  | 171959 | 51.416  | 58.719   |
| 3     | 15.685    | 167361   | 4483   | 1.470   | 1.531    |
| 4     | 18.411    | 5239105  | 111267 | 46.004  | 37.994   |
| Total |           | 11388288 | 292852 | 100.000 | 100.000  |

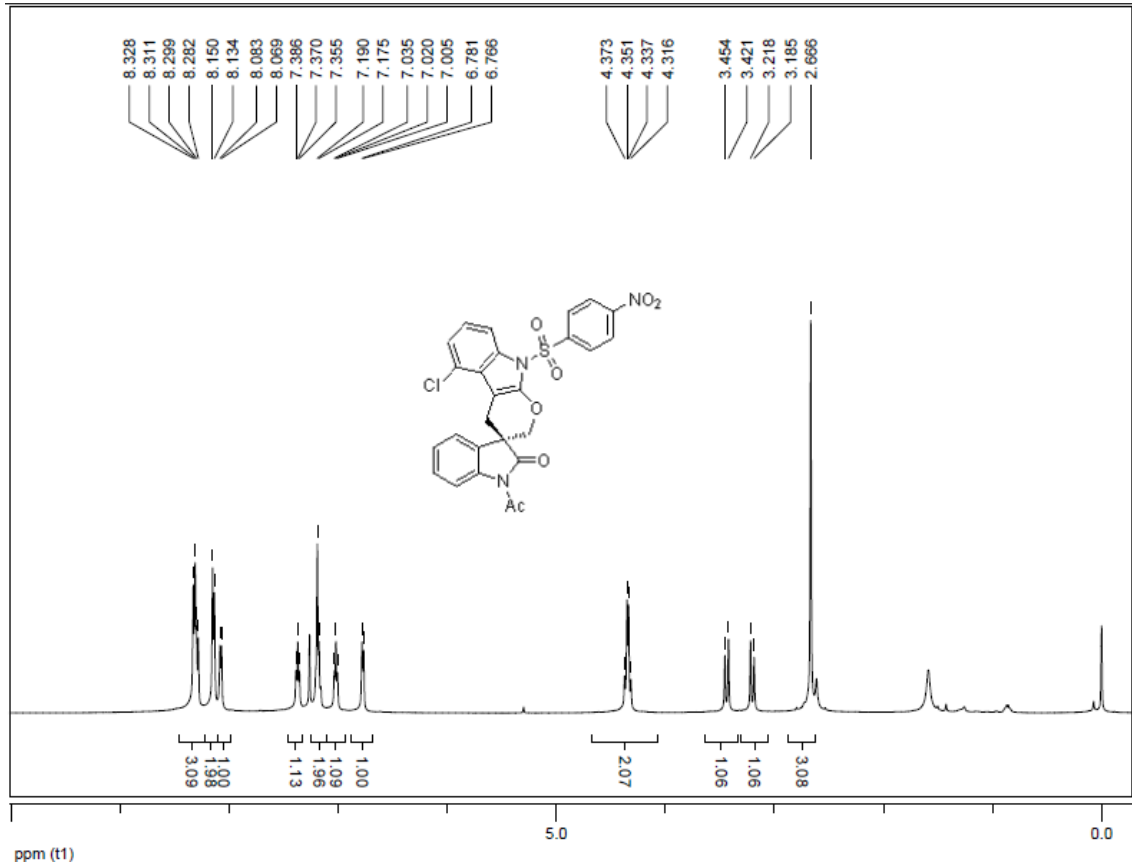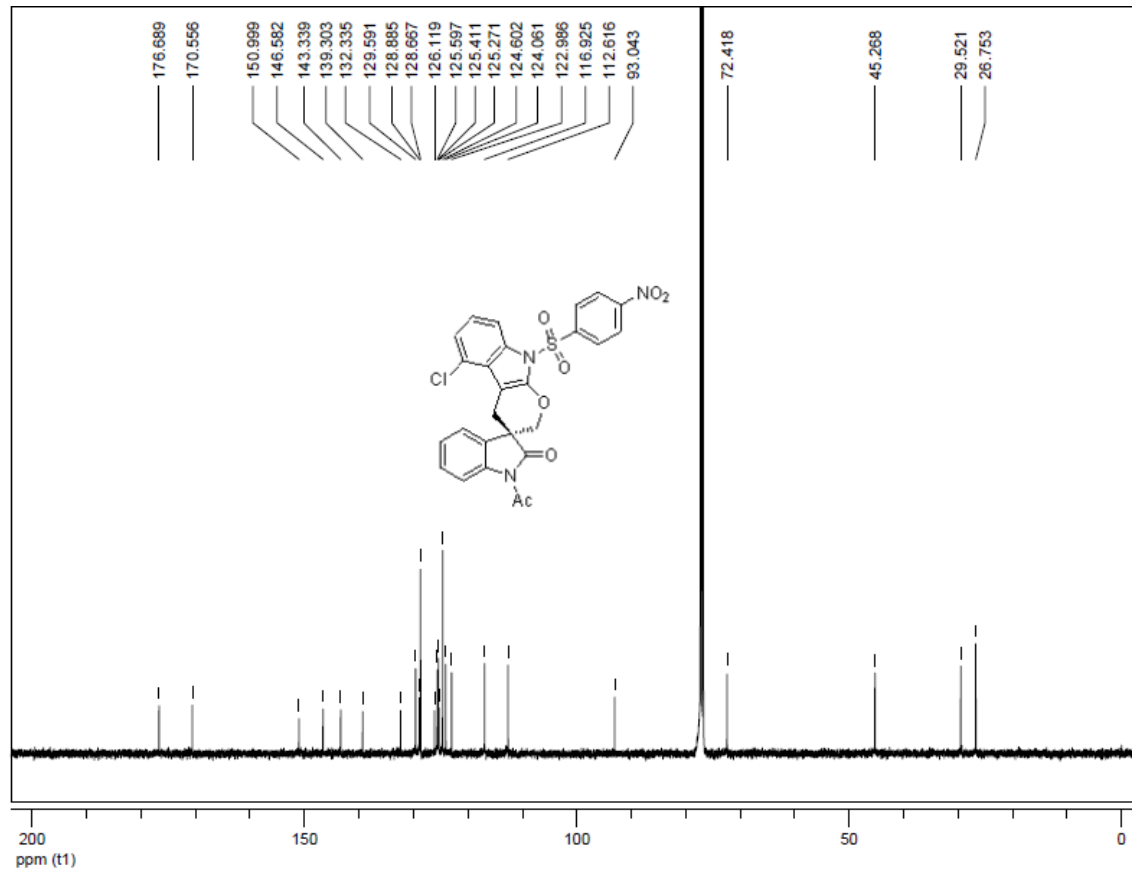

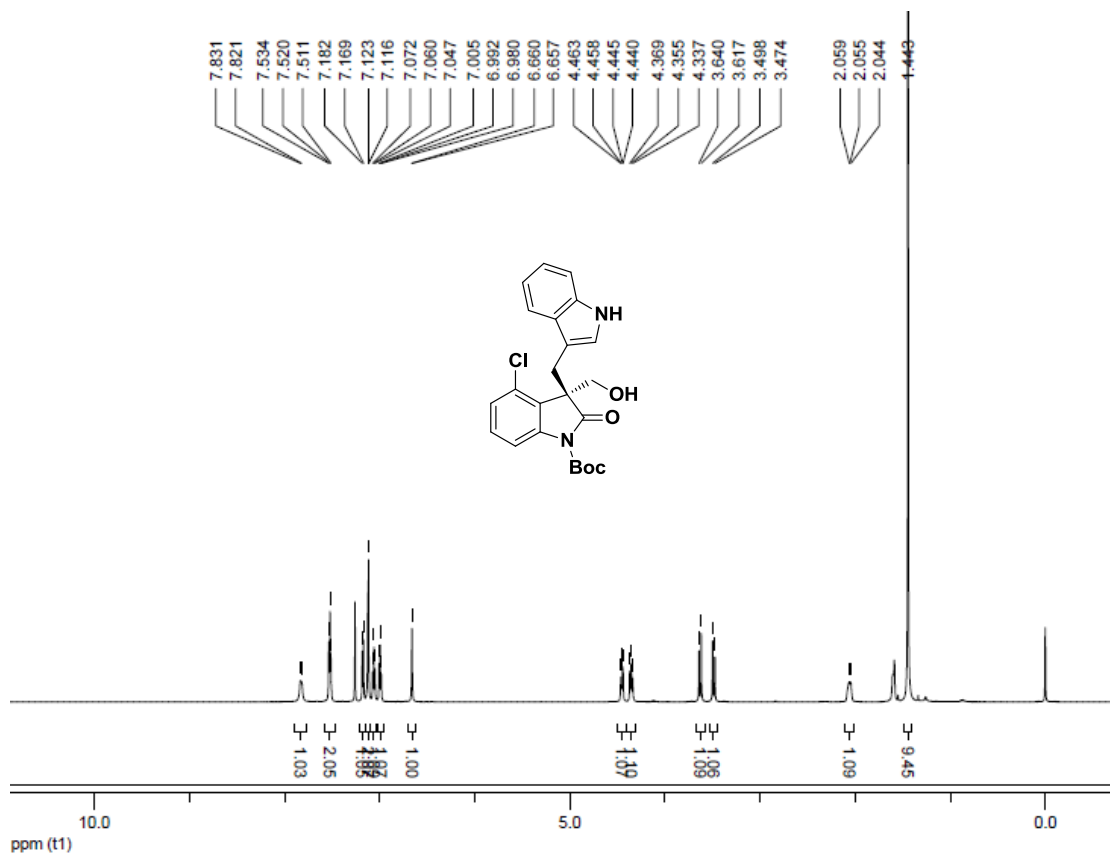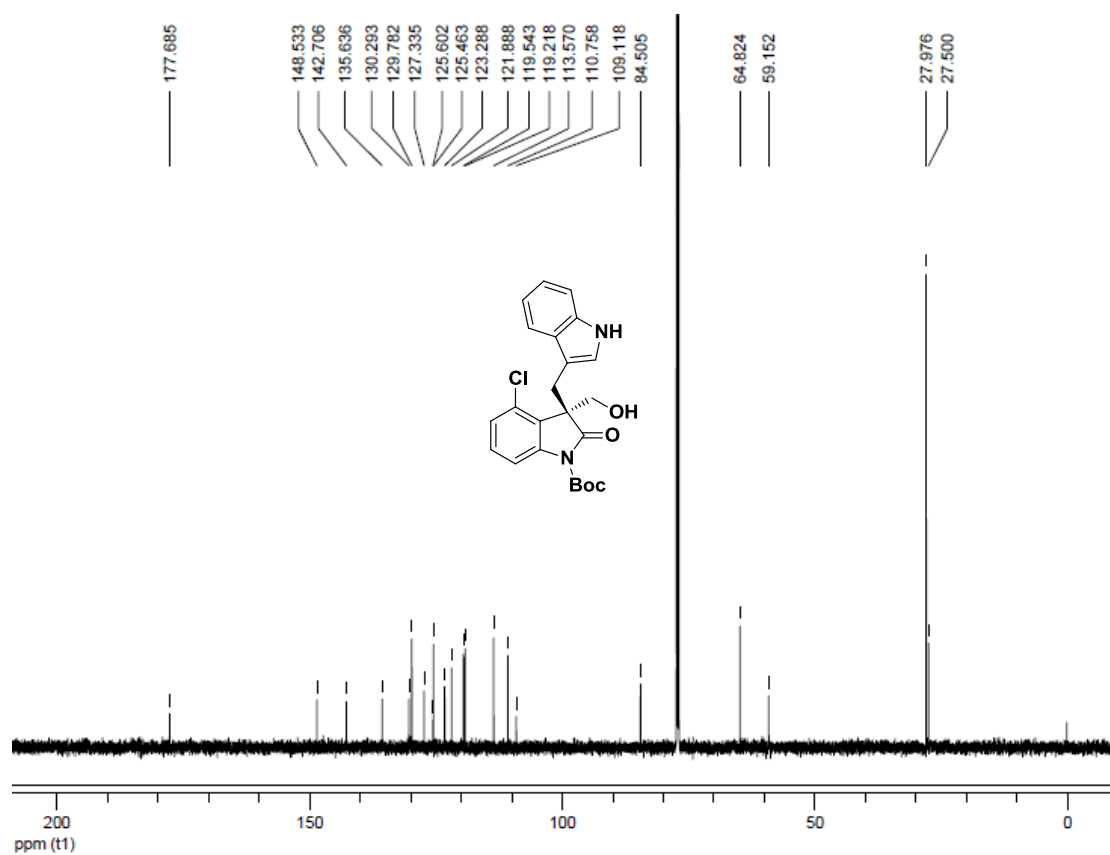

**Racemic: 1r a**

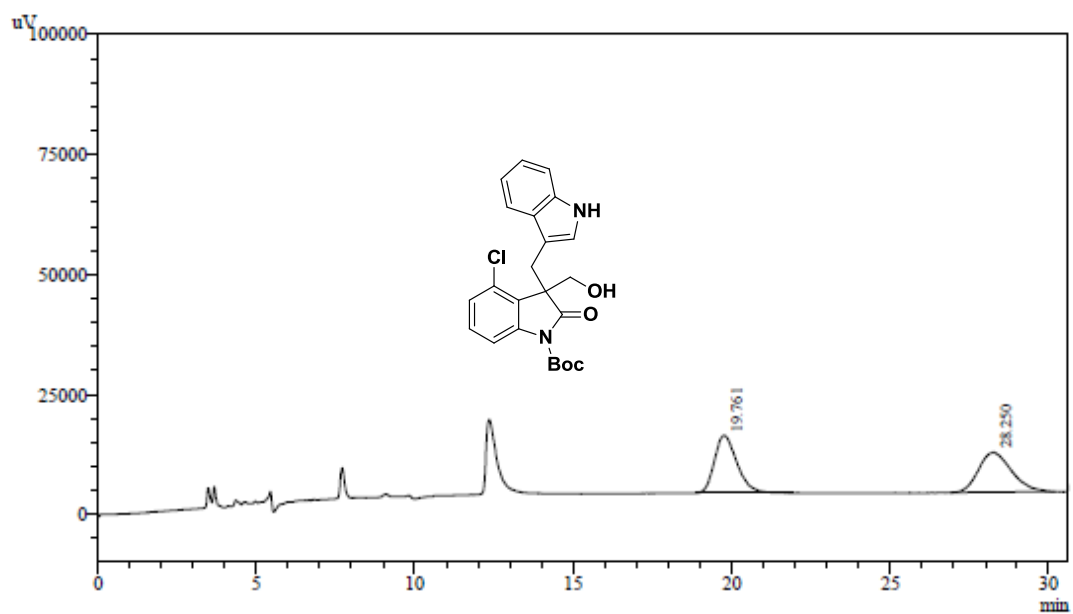

1 Det.A Ch1 / 254nm

Detector A Ch1 254nm

| Peak# | Ret. Time | Area    | Height | Area %  | Height % |
|-------|-----------|---------|--------|---------|----------|
| 1     | 19.761    | 593726  | 11976  | 49.544  | 59.055   |
| 2     | 28.250    | 604654  | 8303   | 50.456  | 40.945   |
| Total |           | 1198380 | 20279  | 100.000 | 100.000  |

**Chiral**

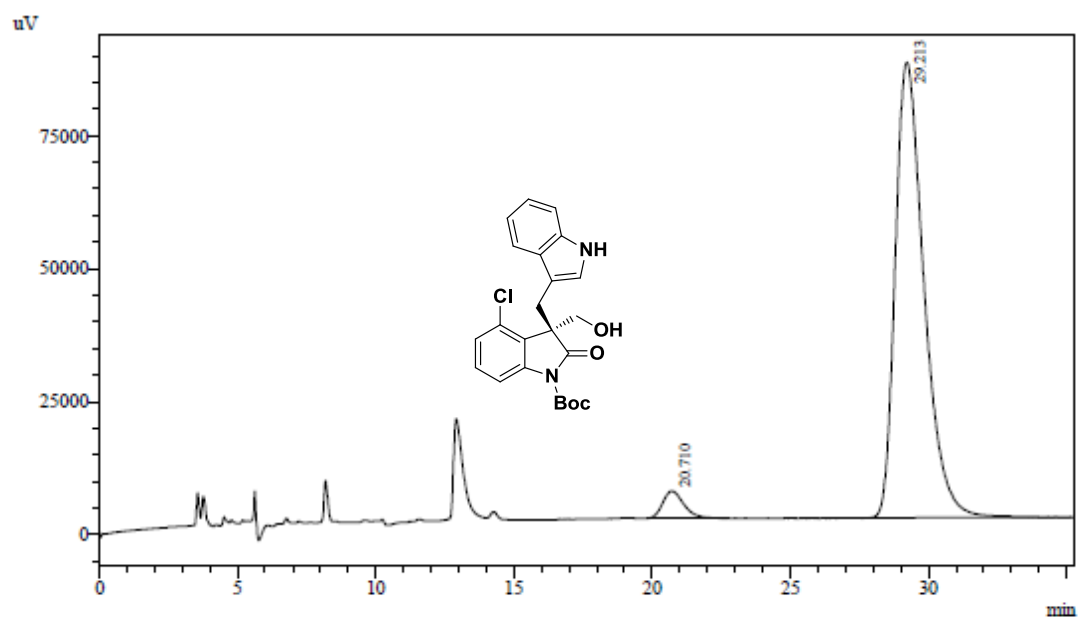

1 Det.A Ch1 / 254nm

Detector A Ch1 254nm

| Peak# | Ret. Time | Area    | Height | Area %  | Height % |
|-------|-----------|---------|--------|---------|----------|
| 1     | 20.710    | 272238  | 5155   | 4.209   | 5.682    |
| 2     | 29.213    | 6196414 | 85574  | 95.791  | 94.318   |
| Total |           | 6468651 | 90729  | 100.000 | 100.000  |
